# Supplementary material
Source: PubMed Central journal article supplement (PMC7211945)
Supplement: pnas.1916711117.sapp.pdf [file pnas.1916711117.sapp.pdf]

Supplementary Information for:

Direct kinetic measurements and theoretical predictions of an isoprene-derived Criegee intermediate

Rebecca L. Caravan, Michael F. Vansco, Kendrew Au, M. Anwar H. Khan, Yu-Lin Li, Frank A. F. Winiberg, Kristen Zuraski, Yen-Hsiu Lin, Wen Chao, Nisalak Trongsiwat, Patrick J. Walsh, David L. Osborn, Carl J. Percival, Jim Jr-Min Lin, Dudley E. Shallcross, Leonid Sheps, Stephen J. Klippenstein, Craig A. Taatjes & Marsha I. Lester.

Correspondence to: Marsha I. Lester  
Email: [milester@sas.upenn.edu](mailto:milester@sas.upenn.edu)

**This PDF file includes:**

Supplementary text:

1. Methods
  - 1.1 Sandia transient absorption experiment
  - 1.2 Sandia MPIMS
  - 1.3 IAMS transient absorption experiment
  - 1.4 Global atmospheric modelling
  - 1.5 Computational kinetics and mechanistic investigations
2. Computational MVK-oxide isomerization kinetics
3. MVK-oxide kinetics and reaction mechanisms
  - 3.1 MVK-oxide formation and unimolecular decay
  - 3.2 MVK-oxide + SO<sub>2</sub>
  - 3.3 MVK-oxide + formic acid
  - 3.4 MVK-oxide + water monomer
4. Global chemical modelling evaluation of particulate formation from MVK-oxide + SO<sub>2</sub>
5. *Ab initio* optimized geometries and frequencies
  - 5.1 MVK-oxide
  - 5.2 MVK-oxide + H<sub>2</sub>O
  - 5.3 MVK-oxide + SO<sub>2</sub>
  - 5.4 MVK-oxide + formic acid
6. SI References

Figures S1 to S13  
Tables S1 to S11

## **1. Methods**

**1.1 Sandia transient absorption experiment.** The UV-Vis spectra of methyl vinyl ketone oxide (MVK-oxide) and kinetics measurements with co-reactant SO<sub>2</sub> or formic acid were obtained using the Sandia broadband multi-pass transient absorption experiment as described previously (1, 2). Following the method of Barber *et al.* (3), MVK-oxide was produced by the 266 nm laser flash photolysis of 1,3-diiodobut-2-ene in the presence of excess O<sub>2</sub>. The vapor of 1,3-diiodobut-2-ene was entrained into a He flow using a pressure- and temperature-controlled glass bubbler. Reactants (1,3-diiodobut-2-ene, O<sub>2</sub> and SO<sub>2</sub> or formic acid) and bath gases (He) were delivered via a set of calibrated mass flow controllers to the reactor (operated at 300 K and 10 Torr). Continuous broadband radiation was provided by a Xe arc lamp, leading to an effective path length in the range 30-40 m across the 300-450 nm spectral range. Time-resolved broadband spectra were obtained for each laser shot and were analyzed by a custom-built spectrometer. Experiments were performed under pseudo-first-order conditions such that [O<sub>2</sub>] >> [1,3-diiodobut-2-ene]. For bimolecular kinetics investigations, [co-reactant] >> [MVK-oxide]. Spectral analysis was performed by subtracting overlapping absorptions due to MVK and IO from the spectrum at long kinetic times, as discussed in the main text. Kinetic data were extracted by integrating over 330-367 nm to avoid perturbations from IO appearance at longer kinetic times. Analysis was conducted for wavelength ranges across the whole spectral range, and the resultant kinetics were consistent. The time traces were fitted with a single-exponential growth, single-exponential decay expression convolved with the instrument response function.

**1.2 Sandia MPIMS.** Complementary experiments to examine the kinetics of the iodoalkenyl + O<sub>2</sub> reaction and the products of *syn*-MVK-oxide + SO<sub>2</sub> and formic acid were performed using the Sandia Multiplexed Photoionization Mass Spectrometer (MPIMS) instrument (4). The MPIMS was interfaced with the tunable-VUV ionizing radiation of the Chemical Dynamics Beamline (9.0.2) of the Advanced Light Source (Lawrence Berkeley National Laboratory). 1,3-diiodobut-2-ene, O<sub>2</sub>, He and SO<sub>2</sub> or formic acid were delivered to a halocarbon wax-coated quartz reactor (298 K, 10 Torr) as described above. MVK-oxide was produced using the method of Barber *et al.* (3), using a 248 nm excimer laser aligned along the length of the reactor. Reactants, intermediates and products were continuously sampled from a pinhole orifice in the reactor sidewall. The resultant molecular beam generated from expansion of the sampled gas into vacuum was intercepted orthogonally by the tunable-VUV radiation. The resultant ions were subsequently detected via orthogonal acceleration time-of-flight mass spectrometry. Experiments were performed at a photoionization energy of 8 eV in the absence of co-reactant, varying [O<sub>2</sub>] to establish the bimolecular rate coefficient for the iodoalkenyl radical + O<sub>2</sub> reaction (see section 3.1). The iodoalkenyl time profiles were fitted with a single exponential decay convolved with the instrument response function. Using the measured bimolecular rate coefficient for iodoalkenyl + O<sub>2</sub>, experimental conditions were designed such that pseudo-first-order conditions were maintained: [O<sub>2</sub>] >> [1,3-diiodobut-2-ene] and [SO<sub>2</sub> or formic acid] >> [MVK-oxide]. Investigations of SO<sub>3</sub> production from the reaction of MVK-oxide with SO<sub>2</sub> were performed using a photoionization energy of 13 eV, above the ionizing threshold of 12.80 eV (5). High-resolution mass spectrometry was utilized to identify SO<sub>3</sub> via its exact mass. SO<sub>3</sub> time traces were fitted with a single-exponential growth single-exponential decay (to account for wall and diffusional loss) expression convolved with an instrument response function. Products of the MVK-oxide + formic acid reaction were investigated through experiments at a fixed ionization energy of 10.5 eV in addition to photoionization efficiency scans at ionization energies between 8.50 and 10.50 eV at 0.05 eV increments. High-resolution mass spectrometry was utilized to identify product formation at *m/z* 87 and 99.

**1.3 IAMS transient absorption experiment.** UV-Vis absorption spectra and kinetics were also recorded using the IAMS transient absorption experiment, detailed previously (6, 7). MVK-oxide was generated using the method of Barber *et al.* (3) via the 248 nm laser photolysis of 1,3-diiodobut-2-ene. The vapor pressure of 1,3-diiodobut-2-ene (heated to ~307 K) was entrained in O<sub>2</sub> or N<sub>2</sub>, then mixed with O<sub>2</sub> prior to entering the photolysis reactor. A set of calibrated mass flow controllers were used to deliver N<sub>2</sub>, O<sub>2</sub>, 1,3-diiodobut-2-ene and SO<sub>2</sub> (or humidified N<sub>2</sub>) to the reactor, which was held at 298 K. Pseudo-first-order conditions were maintained such that [O<sub>2</sub>] >> [1,3-diiodobut-2-ene], and for bimolecular investigations, [SO<sub>2</sub>] or [water] >> [MVK-oxide]. Prior to mixing, the concentrations of 1,3-diiodobut-2-ene and SO<sub>2</sub> were monitored in separate absorption cells by their UV absorption spectra. Absolute SO<sub>2</sub> concentrations were derived by comparing the integrated absorbance to the integrated cross section (8) within 200-250 nm. The concentration of SO<sub>2</sub> was also measured in the photolysis reactor using UV absorption for some

experiments to confirm the concentration calculation. The error from this calibration process is ~8%, including uncertainties in the spectrum measurement, pressure measurement, and uncertainty of the mass flow controllers. The error in [SO<sub>2</sub>] from the reported absolute cross section is about 5–10% (8). Thus, the total error of [SO<sub>2</sub>] is estimated to be 11–14%. [water] was derived in a similar manner with a humidity-temperature sensor. To prevent contamination of the reactor windows, slow flows of N<sub>2</sub> were used to purge the inner surfaces of the windows. To enhance the sensitivity of the absorption measurement, the probe light was focused and passed through the reactor 6 times using a spherical mirror and a SiO<sub>2</sub> prism resulting in an effective absorption length of ~ 426 cm. The spectra were acquired by using a grating spectrometer (Andor SR303i) and an electron-multiplying charge-coupled device (EMCCD, Andor Newton970, DU970N-UVB). The absorption change (after the photolysis pulse) at 340 or 375 nm (selected by a 10 nm bandpass filter) was monitored in real time by using a balanced photodiode detector and recorded by an oscilloscope.

**1.4 Global atmospheric modelling.** Model simulations were conducted to quantify the impact of the MVK-oxide reactions with SO<sub>2</sub> and formic acid on the troposphere using the 3-dimensional global chemistry transport model, STOCHEM-CRI. STOCHEM is based upon a Lagrangian approach, with the chemical outputs being mapped onto a 5° latitude by 5° longitude Eulerian grid with 9 vertical layers. The Lagrangian approach has been used as it allows the advection of the 50,000 air parcels to be uncoupled from the chemical processes within these parcels. It is an 'offline' model with the radiation codes and transport driven by archived meteorological data, produced by the UKMO Unified Model (UM) at a grid resolution of 1.25° longitude, 0.8333° latitude, and 12 unevenly spaced (with respect to altitude) vertical levels with an upper boundary of 100 hPa (9). More details about the meteorological parameterizations in STOCHEM can be found in Collins *et al.* (10) and Derwent *et al.* (11). The chemical mechanism used in STOCHEM, is the common representative intermediates mechanism version 2 and reduction 5 (CRI v2-R5), referred to as 'STOCHEM-CRI' (12-15). The mechanism consists of 229 chemical species and 627 reactions. The emissions data employed in the STOCHEM model were adapted from the Precursor of Ozone and their Effects in the Troposphere (POET) inventory ([http://accent.aero.jussieu.fr/database\\_table\\_inventories.php](http://accent.aero.jussieu.fr/database_table_inventories.php)). The surface emissions from biomass burning, vegetation, oceanic and soil are distributed using monthly two-dimensional source maps at a resolution of 5° longitude × 5° latitude (16). The anthropogenic surface emissions have been distributed using the method developed by the International Institute for Applied Systems Analysis (IIASA) (17). The surface emissions of isoprene are emitted at a rate proportional to the cosine of the solar zenith angle during the day, with no emissions at night. More details about the emissions data of CO, NO<sub>x</sub>, SO<sub>2</sub>, CH<sub>4</sub> and non-methane volatile organic compounds are given by Khan *et al.* (18). The improved CRI v2-R5 mechanism of STOCHEM-CRI utilized in this study incorporates Criegee intermediates (CIs) formed from the ozonolysis reactions of six alkenes: ethene, propene, *trans*-but-2-ene, isoprene, α-pinene and β-pinene. Individual CIs are accounted for with their explicit formation and loss processes in the model. The chemical loss processes of unimolecular decomposition and/or reaction with water monomer and water dimer strongly dominate, which result in very short atmospheric lifetimes of CIs. The detailed information about the formation and loss processes of CIs used in the model can be found in McGillen *et al.* (19) and Chhantyal-Pun *et al.* (20). The loss of MVK-oxide by unimolecular decay, reactions with water monomer and dimer, and with SO<sub>2</sub> have been updated from the study McGillen *et al.* (19) and Chhantyal-Pun *et al.* (20) with the rate coefficients detailed in Table S1. Reactions of other functionalized CIs with SO<sub>2</sub> and formic acid have also been included. The reaction products from CH<sub>2</sub>OO + water dimer have been updated, following recent experimental characterization by Sheps *et al.* (21) that revealed little formic acid production from this reaction. As a result of this, global modelled formic acid concentrations are reduced by 3% compared with previous model evaluations. Following the inclusion of the CI field, each air parcel contains 248 species that compete in 786 chemical reactions and utilize a time-step of 5 minutes.

**Table S1.** Reactions of Criegee intermediates and associated rate coefficients accounted for in the atmospheric model utilized in this work. The rate coefficients in bold font are those updated from previous work (19, 20).

| Criegee intermediate                                                                | Rate coefficients <sup>a</sup>                                                                                                                                                                                                                                                                                                                                                                                     | References                                                                                                |
|-------------------------------------------------------------------------------------|--------------------------------------------------------------------------------------------------------------------------------------------------------------------------------------------------------------------------------------------------------------------------------------------------------------------------------------------------------------------------------------------------------------------|-----------------------------------------------------------------------------------------------------------|
|    | $k_{(\text{H}_2\text{O})_2}$ : $3.92 \times 10^{-16} \exp(2930/T)$                                                                                                                                                                                                                                                                                                                                                 | Smith <i>et al.</i> (22)                                                                                  |
|    | $k_{\text{uni}}$ : $2.76 \times 10^{-73} T^{27.88} \exp(3978/T)$<br>$k_{\text{SO}_2}$ : <b><math>2.4 \times 10^{-11}</math></b><br>$k_{\text{HCOOH}}$ : <b><math>2.5 \times 10^{-10}</math></b>                                                                                                                                                                                                                    | Fang <i>et al.</i> (23)<br>Taatjes <i>et al.</i> (24)<br>Welz <i>et al.</i> (25)                          |
|    | $k_{\text{H}_2\text{O}}$ : $1.3 \times 10^{-14} \text{ cm}^3 \text{ s}^{-1}$<br>$k_{(\text{H}_2\text{O})_2}$ : $5.23 \times 10^{-20} \exp(6124/T)$<br>$k_{\text{SO}_2}$ <b><math>6.7 \times 10^{-11}</math></b><br>$k_{\text{HCOOH}}$ <b><math>5.0 \times 10^{-10}</math></b>                                                                                                                                      | Lin <i>et al.</i> (26)<br>Lin <i>et al.</i> (26)<br>Taatjes <i>et al.</i> (24)<br>Welz <i>et al.</i> (25) |
|    | $k_{\text{uni}}^{\text{b}}$ : $2.46 \times 10^{-76} T^{29.09} \exp(3545/T)$<br>$k_{\text{H}_2\text{O}}$ : <b><math>3.4 \times 10^{-19}</math></b><br>$k_{(\text{H}_2\text{O})_2}$ : <b><math>9.2 \times 10^{-16}</math></b><br>$k_{\text{SO}_2}$ : <b><math>3.9 \times 10^{-11} \text{ cm}^3 \text{ s}^{-1}</math></b><br>$k_{\text{HCOOH}}$ : <b><math>3.0 \times 10^{-10} \text{ cm}^3 \text{ s}^{-1}</math></b> | Barber <i>et al.</i> (3)<br>Anglada and Solé (27)<br>Anglada and Solé (27)<br>This study<br>This study    |
|   | $k_{\text{uni}}$ : $1.94 \times 10^{12} \exp(-6150/T)$                                                                                                                                                                                                                                                                                                                                                             | Barber <i>et al.</i> (3)                                                                                  |
|  | $k_{\text{uni}}$ : $1.59 \times 10^{11} T^{0.44} \exp(-6102/T)$                                                                                                                                                                                                                                                                                                                                                    | Vereecken <i>et al.</i> (28)                                                                              |
|  | $k_{\text{H}_2\text{O}}$ : $2.13 \times 10^{-19} T^{1.74} \exp(-929/T)$<br>$k_{(\text{H}_2\text{O})_2}$ : $2.24 \times 10^{-19} T^{1.73} \exp(1313/T)$<br>$k_{\text{uni}}$ : $5.93 \times 10^8 T^{1.46} \exp(-7832/T)$                                                                                                                                                                                             | Vereecken <i>et al.</i> (28)<br>Vereecken <i>et al.</i> (28)<br>Vereecken <i>et al.</i> (28)              |
|  | $k_{\text{uni}}$ : $1.9 \times 10^9 T^{1.33} \exp(-8425/T)$<br>$k_{\text{H}_2\text{O}}$ : $8.46 \times 10^{-23} T^{2.64} \exp(121/T)$                                                                                                                                                                                                                                                                              | Vereecken <i>et al.</i> (28)<br>Vereecken <i>et al.</i> (28)                                              |
|  | $k_{\text{uni}}$ : $2.76 \times 10^{-73} T^{27.88} \exp(3978/T)$                                                                                                                                                                                                                                                                                                                                                   | Same $k_{\text{uni}}$ as used for <i>syn</i> -CH <sub>3</sub> CHOO                                        |

<sup>a</sup>The units of the unimolecular and bimolecular rate coefficient are s<sup>-1</sup> and cm<sup>3</sup> s<sup>-1</sup>, respectively.

<sup>b</sup>Note that OH produced from the unimolecular decomposition of stabilized *syn*-MVK-oxide is omitted from the model. This is a relatively minor source of OH and is anticipated to have minimal perturbation on the reactions assessed herein.

| Criegee intermediate                                                                                                   | Rate coefficients <sup>a</sup>                                                                                                                                                                                                                                            | References                                                                                                                                                                        |
|------------------------------------------------------------------------------------------------------------------------|---------------------------------------------------------------------------------------------------------------------------------------------------------------------------------------------------------------------------------------------------------------------------|-----------------------------------------------------------------------------------------------------------------------------------------------------------------------------------|
| 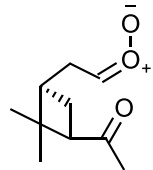<br>syn-pinonaldehyde oxide           | $k_{\text{uni}}: 2.76 \times 10^{-73} T^{27.88} \exp(3978/T)$                                                                                                                                                                                                             | Same $k_{\text{uni}}$ as used for syn-CH <sub>3</sub> CHOO                                                                                                                        |
| <br>anti-pinonaldehyde oxide          | $k_{\text{H}_2\text{O}}: 1.3 \times 10^{-14} \text{ cm}^3 \text{ s}^{-1}$<br>$k_{(\text{H}_2\text{O})_2}: 5.23 \times 10^{-20} \exp(6124/T)$<br><b><math>k_{\text{SO}_2}: 6.7 \times 10^{-11}</math></b><br><b><math>k_{\text{HCOOH}}: 5.0 \times 10^{-10}</math></b>     | Same $k_{\text{H}_2\text{O}}$ , $k_{(\text{H}_2\text{O})_2}$ <b><math>k_{\text{SO}_2}</math></b> and <b><math>k_{\text{HCOOH}}</math></b> as used for anti-CH <sub>3</sub> CHOO   |
| <br>anti-isopinonaldehyde oxide       | $k_{\text{uni}}: 2.76 \times 10^{-73} T^{27.88} \exp(3978/T)$                                                                                                                                                                                                             | Same $k_{\text{uni}}$ as used for syn-CH <sub>3</sub> CHOO                                                                                                                        |
| <br>syn-isopinonaldehyde oxide        | $k_{\text{uni}}: 6.95 \times 10^{-66} T^{25.7} \exp(2391/T)$                                                                                                                                                                                                              | Vereecken <i>et al.</i> (28)                                                                                                                                                      |
| <br>syn-CH <sub>3</sub> C(O)CHOO    | $k_{\text{H}_2\text{O}}: 2.18 \times 10^{-19} T^{1.43} \exp(1268/T)$<br>$k_{(\text{H}_2\text{O})_2}: 2.26 \times 10^{-19} T^{1.43} \exp(3279/T)$<br><b><math>k_{\text{SO}_2}: 2.4 \times 10^{-11}</math></b><br><b><math>k_{\text{HCOOH}}: 2.5 \times 10^{-10}</math></b> | Vereecken <i>et al.</i> (28)<br>Vereecken <i>et al.</i> (28)<br><b>Same <math>k_{\text{SO}_2}</math> and <math>k_{\text{HCOOH}}</math> as used for syn-CH<sub>3</sub>CHOO</b>     |
| <br>anti-CH <sub>3</sub> C(O)CHOO   | $k_{\text{H}_2\text{O}}: 1.3 \times 10^{-14} \text{ cm}^3 \text{ s}^{-1}$<br>$k_{(\text{H}_2\text{O})_2}: 5.23 \times 10^{-20} \exp(6124/T)$<br><b><math>k_{\text{SO}_2}: 6.7 \times 10^{-11}</math></b><br><b><math>k_{\text{HCOOH}}: 5.0 \times 10^{-10}</math></b>     | Same $k_{\text{H}_2\text{O}}$ , $k_{(\text{H}_2\text{O})_2}$ , <b><math>k_{\text{SO}_2}</math></b> and <b><math>k_{\text{HCOOH}}</math></b> as used for anti-CH <sub>3</sub> CHOO |
| <br>syn-(CH <sub>3</sub> )(CHO)COO  | $k_{\text{uni}}: 2.76 \times 10^{10} T^{0.78} \exp(-5162/T)$<br>$k_{\text{H}_2\text{O}}: 7.81 \times 10^{-20} T^{1.68} \exp(757/T)$<br>$k_{(\text{H}_2\text{O})_2}: 8.07 \times 10^{-20} T^{1.67} \exp(2828/T)$                                                           | Vereecken <i>et al.</i> (28)<br>Vereecken <i>et al.</i> (28)<br>Vereecken <i>et al.</i> (28)                                                                                      |
| <br>anti-(CH <sub>3</sub> )(CHO)COO | $k_{\text{uni}}: 2.76 \times 10^{-73} T^{27.88} \exp(3978/T)$                                                                                                                                                                                                             | Same $k_{\text{uni}}$ as used for syn-CH <sub>3</sub> CHOO                                                                                                                        |

<sup>a</sup>The units of the unimolecular and bimolecular rate coefficient are s<sup>-1</sup> and cm<sup>3</sup> s<sup>-1</sup>, respectively.

<sup>b</sup>Note that OH produced from the unimolecular decomposition of stabilized *syn*-MVK-oxide is omitted from the model. This is a relatively minor source of OH and is anticipated to have minimal perturbation on the reactions assessed herein.

**1.5 Computational kinetics and mechanistic investigations.** Coupled cluster calculations were performed using MOLPRO (29), with the CCSDT(Q) calculations employing Kállay's MRCC supplement (30). Density functional theory calculations were performed using G09 (31). The master equation calculations were undertaken with the MESS code (32, 33), and the variable reaction coordinate transition state theory (TST) calculations were performed with VaReCoF (34).

## **2. Computational MVK-oxide isomerization kinetics**

As discussed in the main text, there are four low lying conformers of MVK-oxide. A proper analysis of the experimental observations requires some understanding of the timescales for isomerization between these conformers. A high-level *ab initio* kinetics analysis for the unimolecular dissociation rates of *syn*- and *anti*-MVK-oxide was reported by Barber *et al.* (3). This previous analysis is readily adapted to predict the rates of isomerization between the four conformers under temperature and pressure conditions of relevance to Earth's atmosphere.

The focus of Barber *et al.* (3) involved dissociation of MVK-oxide at specific excitation energies (ca. 6000  $\text{cm}^{-1}$ ) obtained through direct IR-excitation. At these energies, isomerizations between the *cis* and *trans* forms of *syn*-MVK-oxide (and similarly *cis*- and *trans-anti*-MVK-oxide) are rapid relative to the dissociation timescale. Thus, the two *cis* and *trans* conformers were treated as merged species for both the *syn* and *anti* forms. For the present analysis, we instead treat all four conformers as distinct species within the master equation and directly explore both the *cis-trans* and *syn-anti* isomerizations.

This analysis indicates that: (i) all four conformers are kinetically stable (i.e., their isomerization rate coefficients are smaller than the collisional relaxation rates), (ii) the *cis-trans* isomerization rates are fast on the timescale of the present experiments, and (iii) the *syn-anti* isomerization rates are slow on the timescale of experiment. The first finding indicates that, at least in principle, one can properly derive bimolecular rate coefficients separately for each of the individual conformers. However, the second finding indicates that the experimental observations cannot resolve the *cis* and *trans* conformers as separate species and so the observed reactive decays will instead correspond to the Boltzmann weighted average of the rate coefficients for the *cis* and *trans* pair of species. Meanwhile, the third finding indicates that the *syn*- and *anti*-conformers should exhibit distinct decays.

The underlying energies for this master equation analysis of the isomerization are as reported by Barber *et al.* (3). They were largely obtained from CCSD(T)-F12b/CBS(cc-pVTZ-F12,cc-pVQZ-F12)//B2PLYPD3/cc-pVTZ evaluations coupled with CCSDT(Q)/cc-pVDZ corrections for higher order excitations, CCSD(T)/CBS(cc-pcVTZ,cc-pcVQZ) core-valence corrections, and B2PLYP-D3/cc-pVTZ anharmonicity corrections. For the two *syn*- to *anti*- torsional saddle points, the barrier heights were instead based on CASPT2 analyses due to the presence of significant multireference effects arising from the breaking of the O=O double bond in the zwitterionic resonant form of MVK-oxide. To facilitate interpretation of the present isomerization kinetics analysis, these conformer energies and isomerization barriers are reported again in Table S2.

In the present master equation analysis, the  $\text{CH}_3$  groups were again treated as 1-dimensional hindered rotors with the torsional potentials as described by Barber *et al.* (3). For the  $\text{C}_2\text{H}_3$  rotors, with our current codes, there is some difficulty in assigning the state density from the quantized hindered rotor states for the overall torsional motion to specific conformational states. Here we considered two simple approximations and found that the predicted rates agreed to within  $\sim 10\%$ . In particular, the simplest approximation involved the treatment of these modes as harmonic oscillators. An alternative treatment replaced the full torsional potential with a symmetrized potential that roughly corresponds to restricting the range of torsional space for that rotor to  $\pm 90$  degrees from the given conformer. The isomerization rates predicted with the harmonic separation approximation are reported in Table S3. The *syn-anti* and *anti-syn* rates are too small to be kinetically relevant ( $10^{-3} \text{ s}^{-1}$  or less) and so are not reported here. For comparison purposes, the corresponding conformer-specific unimolecular dissociation rate coefficients are also reported therein. The bath gas for these calculations was presumed to be  $\text{N}_2$ , although minimal bath gas dependence is anticipated. The conformer-specific partition functions and Boltzmann thermal probabilities reported in Table S4 allow for the conversion of these conformer-specific isomerization and dissociation rate coefficients to more averaged quantities such as the *syn*- and *anti*- rate coefficients. In summary, *syn-anti* isomerization of MVK-oxide will be negligibly slow due to the high barriers (Table S2) associated with rotation about C=O bond, and thus *syn*- and *anti*-conformers of MVK-oxide can be treated as distinct species. By contrast, the theoretical analysis demonstrates the rapid rate for *cis-trans* isomerization (ca.  $10^7 \text{ s}^{-1}$ , Table S3) for both *syn*- and *anti*-conformers of MVK-oxide due to the much lower barriers (Table S2) associated with rotation about the C-C single bond. The corresponding timescale for *cis-trans* isomerization is sub-microsecond, which is significantly faster than the experimental timescale of milliseconds. As a result, the *cis* and *trans* forms will rapidly interconvert with population of the lower energy *trans* form strongly favored over the higher energy *cis* form under thermal conditions.

**Table S2.** Stationary point energies (kcal mol<sup>-1</sup>) for MVK-oxide isomerization.

| Species                                               | CCSD(T)-F12b |            |            |       | T(Q)<br>Corr. | T(Q)<br>Corr. | Core<br>Val.     | E0       | Anh.     | Total <sup>a</sup> |
|-------------------------------------------------------|--------------|------------|------------|-------|---------------|---------------|------------------|----------|----------|--------------------|
|                                                       | DZ-<br>F12   | TZ-<br>F12 | QZ-<br>F12 | CBS   | DZ            | 6-<br>31G*    | CBS<br>TZ-<br>QZ | B2<br>TZ | B2<br>TZ |                    |
| <i>syn-trans</i>                                      | 0.0          | 0          | 0          | 0     | 0             | 0             | 0                | 0        | 0        | 0                  |
| <i>syn-cis</i>                                        | 1.93         | 1.94       | 1.94       | 1.94  | 0.01          | 0.04          | 0.05             | -0.19    | 0.00     | 1.76               |
| <i>anti-trans</i>                                     | 2.70         | 2.72       | 2.74       | 2.75  | -0.07         | -0.03         | 0.01             | -0.10    | -0.03    | 2.57               |
| <i>anti-cis</i>                                       | 2.84         | 2.79       | 2.79       | 2.78  | 0.20          | 0.21          | 0.01             | 0.03     | -0.01    | 3.05               |
| <i>syn-cis</i> to<br><i>syn-trans</i>                 | 8.09         | 8.17       | 8.17       | 8.17  | 0.45          | 0.41          | 0.01             | -0.63    | -0.03    | 7.97               |
| <i>anti-cis</i> to<br><i>anti-trans</i>               | 11.46        | 11.56      | 11.56      | 11.56 | 0.41          | 0.37          | 0.01             | -0.71    | -0.03    | 11.25              |
| <i>syn-trans</i> to<br><i>anti-trans</i> <sup>a</sup> | -            | -          | -          | -     | -             | -             | -                | -        | -        | 30.93 <sup>a</sup> |
| <i>syn-cis</i> to<br><i>anti-cis</i> <sup>a</sup>     | -            | -          | -          | -     | -             | -             | -                | -        | -        | 30.63 <sup>a</sup> |

<sup>a</sup>The total energies for the *syn-anti* zero-point corrected barriers are derived from CASPT2(4e,4o)/cc-pVTZ calculations of the singlet-triplet splitting at the saddle point coupled with CCSD(T)-F12 based evaluations of the triplet energy as described in detail by Barber *et al.* (3). Also, as reported by Barber *et al.* (3) the total energy includes a minor ( $\leq 0.01$  kcal mol<sup>-1</sup>) contribution from relativistic effects.

**Table S3.** Predicted MVK-oxide *cis-trans* isomerization rate coefficients (s<sup>-1</sup>) and conformer-specific dissociation rate coefficients (s<sup>-1</sup>) for a range of temperatures and pressures.

| T/K              | P/atm | <i>syn-trans</i> | <i>syn-cis</i>   | <i>anti-trans</i> | <i>anti-cis</i>   | <i>syn-trans</i> | <i>syn-cis</i> | <i>anti-</i> | <i>anti-</i> |
|------------------|-------|------------------|------------------|-------------------|-------------------|------------------|----------------|--------------|--------------|
|                  |       | <i>syn-cis</i>   | <i>syn-trans</i> | <i>anti-cis</i>   | <i>anti-trans</i> |                  |                | <i>cis</i>   | <i>trans</i> |
| 225              | 0.01  | 4.1e3            | 1.3e5            | 1.9e3             | 5.1e3             | -                | -              | 2.1          | 3.7          |
| 250              |       | 1.6e4            | 3.4e5            | 9.0e3             | 2.2e4             | 1.6              | 8.6            | 28           | 45           |
| 275              |       | 4.6e4            | 6.8e5            | 3.0e4             | 6.5e4             | 6.3              | 31             | 230          | 330          |
| 298              |       | 1.0e5            | 1.1e6            | 7.0e4             | 1.4e5             | 22               | 110            | 1.1e3        | 1.5e3        |
| 350              |       | 3.7e5            | 2.6e6            | 2.8e5             | 5.1e5             | 240              | 1.9e3          | 1.4e4        | 1.8e4        |
| 400              |       | -                | -                | 6.7e5             | 1.2e6             | 4.0e3            | -              | 7.7e5        | 9.8e4        |
| 225              | 0.1   | 2.1e4            | 6.6e5            | 7.1e3             | 1.9e4             | -                | -              | 2.6          | 4.7          |
| 250              |       | 9.0e4            | 1.9e6            | 3.8e4             | 9.1e4             | 1.7              | 6.4            | 39           | 63           |
| 275              |       | 2.8e5            | 4.1e6            | 1.4e5             | 3.1e5             | 6.5              | 29             | 350          | 520          |
| 298              |       | 6.4e5            | 7.3e6            | 3.6e5             | 7.4e5             | 23               | 110            | 1.8e3        | 2.6e3        |
| 350              |       | 2.6e6            | 1.8e7            | 1.7e6             | 3.1e6             | 320              | 1.9e3          | 3.2e4        | 4.2e4        |
| 400              |       | -                | -                | 4.5e6             | 7.7e6             | 5.6e3            | -              | 2.2e5        | 2.8e5        |
| 225              | 1     | 6.5e4            | 2.1e6            | 1.6e4             | 4.1e4             | -                | -              | 2.4          | 6.0          |
| 250              |       | 3.2e5            | 6.7e6            | 9.7e4             | 2.3e5             | 1.6              | 7.3            | 38           | 78           |
| 275              |       | 1.1e6            | 1.7e7            | 4.1e5             | 9.0e5             | 6.5              | 29             | 360          | 650          |
| 298 <sup>a</sup> |       | 2.9e6            | 3.3e7            | 1.2e6             | 2.5e6             | 24               | 102            | 2.1e3        | 3.3e3        |
| 350              |       | 1.3e7            | 9.6e7            | 7.0e6             | 1.3e7             | 390              | 1.6e3          | 4.3e4        | 6.0e4        |
| 400              |       | 3.8e7            | 1.9e8            | 2.2e7             | 3.8e7             | 3.3e3            | 2.1e4          | 3.6e5        | 4.7e5        |

<sup>a</sup>At 298 K and 1 atm, the average decay rate for the *syn*-conformers is 33 s<sup>-1</sup> based on a Boltzmann average  $[Q_1k_1 + Q_2k_2]/(Q_1+Q_2)$ , where  $Q_i$  is the partition function for conformer  $i$  (*cis* or *trans*), c.f. Table S4. Similarly, the Boltzmann averaged decay rate for *anti*-conformers is 2140 s<sup>-1</sup>.



**Table S4.** MVK-oxide partition functions and thermal probabilities.<sup>a</sup>

| T/K | Partition Functions (cm <sup>3</sup> ) <sup>b</sup> |                |                   |                 | P <sub>trans</sub>      |                          | P <sub>syn</sub> <sup>e</sup> |
|-----|-----------------------------------------------------|----------------|-------------------|-----------------|-------------------------|--------------------------|-------------------------------|
|     | <i>syn-trans</i>                                    | <i>syn-cis</i> | <i>anti-trans</i> | <i>anti-cis</i> | <i>syn</i> <sup>b</sup> | <i>anti</i> <sup>d</sup> |                               |
| 225 | 2.5e32                                              | 4.1e32         | 3.8e32            | 4.2e32          | 0.969                   | 0.725                    | 0.994                         |
| 250 | 4.8e32                                              | 7.9e32         | 7.3e32            | 8.1e32          | 0.954                   | 0.705                    | 0.988                         |
| 275 | 8.9e32                                              | 1.5e33         | 1.4e33            | 1.5e33          | 0.937                   | 0.687                    | 0.981                         |
| 298 | 1.5e33                                              | 2.6e33         | 2.5e33            | 2.6e33          | 0.919                   | 0.674                    | 0.973                         |
| 350 | 5.1e33                                              | 9.0e33         | 8.2e33            | 8.7e33          | 0.877                   | 0.651                    | 0.949                         |
| 400 | 1.5e34                                              | 2.8e34         | 2.5e34            | 2.6e34          | 0.835                   | 0.635                    | 0.922                         |

<sup>a</sup>Note that the thermal probabilities reported here (P<sub>trans</sub>, P<sub>syn</sub>, etc.) are for an equilibrium distribution of MVK-oxide conformers and do not reflect the nascent or time-dependent populations from the experiments.

<sup>b</sup>Partition functions defined relative to their conformer-specific ground state energy.

<sup>c</sup>Thermal probability of the *trans* conformer within *trans*- and *cis-syn*-MVK-oxide.

<sup>d</sup>Thermal probability of the *trans* conformer within *trans*- and *cis-anti*-MVK-oxide.

<sup>e</sup>Thermal probability of the *syn*- conformer of MVK-oxide.

### 3. MVK-oxide kinetics and reaction mechanisms

#### 3.1 MVK-oxide formation and unimolecular decay.

**Iodoalkenyl + O<sub>2</sub> kinetics for MVK-oxide formation.** To establish the rate of formation of MVK-oxide from the iodoalkenyl ( $\text{C}_4\text{H}_6\text{I}$ ) + O<sub>2</sub> reaction, the rate coefficient for the reaction was measured by direct monitoring of the iodoalkenyl radical at  $m/z$  181 using MPIMS at a photoionization energy of 8 eV. This energy was chosen such that it was below the threshold for dissociative ionization of the photolytic precursor ( $\text{C}_4\text{H}_6\text{I}_2$ ) appearing at the mass of the iodoalkenyl radical. A bimolecular rate coefficient of  $(1.70 \pm 0.07) \times 10^{-13} \text{ cm}^3 \text{ s}^{-1}$  for the reaction of  $\text{C}_4\text{H}_6\text{I} + \text{O}_2$  is established (Figure S1) – around an order of magnitude slower than for the equivalent CH<sub>2</sub>OO formation reaction ( $\text{CH}_2\text{I} + \text{O}_2$ ) (35). This is rationalized by the resonance stabilization of the iodoalkenyl radical in the present case – comparisons can be drawn with  $\text{R} + \text{O}_2$  reactions, where the rate coefficients are typically an order of magnitude slower for resonance stabilized R, due to the loss of resonance stabilization on addition of O<sub>2</sub>.

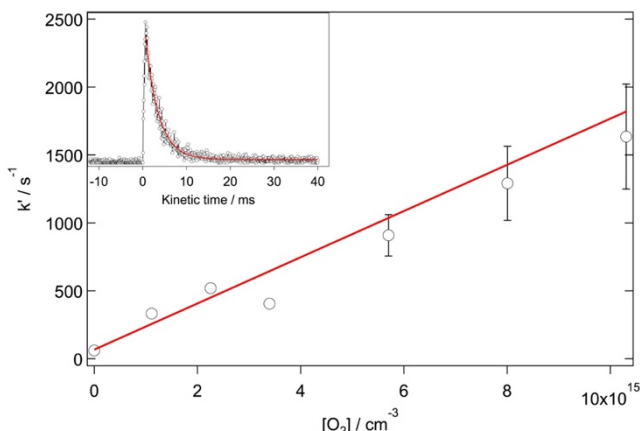

**Fig. S1.** First order rate coefficient for the loss of the iodoalkenyl radical as a function of [O<sub>2</sub>], recorded at a photoionization energy of 8 eV using the Sandia MPIMS experiment. An example kinetic trace of the iodoalkenyl radical is inset. Kinetic traces are fitted with a single exponential decay expression convolved with the instrument response function. The bimolecular rate coefficient is obtained from a linear fit to  $k'$  vs. [O<sub>2</sub>], weighted to the 95% confidence limit error bars (note that the error bars for the first four points are smaller than the symbols). From this a bimolecular rate coefficient of  $(1.70 \pm 0.07) \times 10^{-13} \text{ cm}^3 \text{ s}^{-1}$  is obtained.

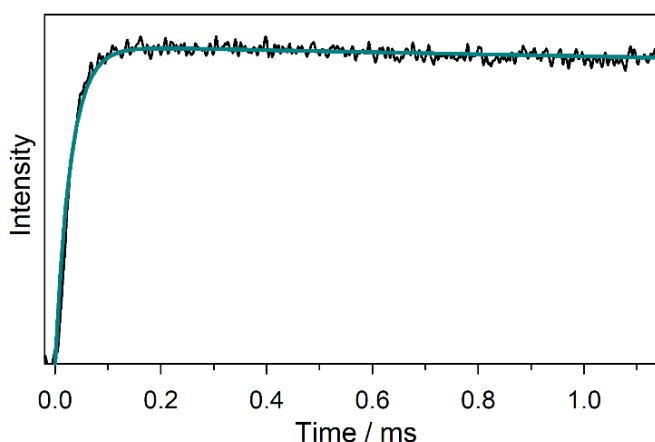

**Fig. S2.** Enlarged inset from Figure 1 (lower panel) from the main text. Kinetic time trace for MVK-oxide from the Sandia experiment (black) integrated between 330-367 nm compared with the simulated thermal unimolecular decay for *syn*-conformers to 2-hydroperoxyl-buta-1,3-diene (cyan) with  $k(T) = 33 \text{ s}^{-1}$  ( $T = 298 \text{ K}$ ). Thermal rates are computed using *ab initio* master equation modeling in the high-pressure limit (3). The simulations include an experimental rise time for MVK-oxide appearance of 30  $\mu\text{s}$  from the reaction of the iodoalkenyl radical + O<sub>2</sub>.

### 3.2 MVK-oxide + SO<sub>2</sub>.

**Further experimental evidence for SO<sub>3</sub> formation.** Using the bimolecular rate coefficient measured via the Sandia transient absorption experiment, and assuming a first order loss rate of 300 s<sup>-1</sup> (based on the transient absorption measured first order loss, and consistent with previous smaller CI first order losses in the MPIMS experiments), the signal appearing at the exact mass of SO<sub>3</sub> (m/z = 79.96) at 13 eV can be evaluated versus the fraction of MVK-oxide undergoing reaction with SO<sub>2</sub>. A linear increase in the amplitude of the signal at m/z 79.96 is observed with increasing fraction of MVK-oxide undergoing reaction with SO<sub>2</sub> (Figure S3). This, together with the exact mass determination (Figure S3, inset) and the bimolecular rate coefficient for formation (main text, Figure 3) provides further experimental evidence that SO<sub>3</sub> is a direct product of the MVK-oxide + SO<sub>2</sub> reaction.

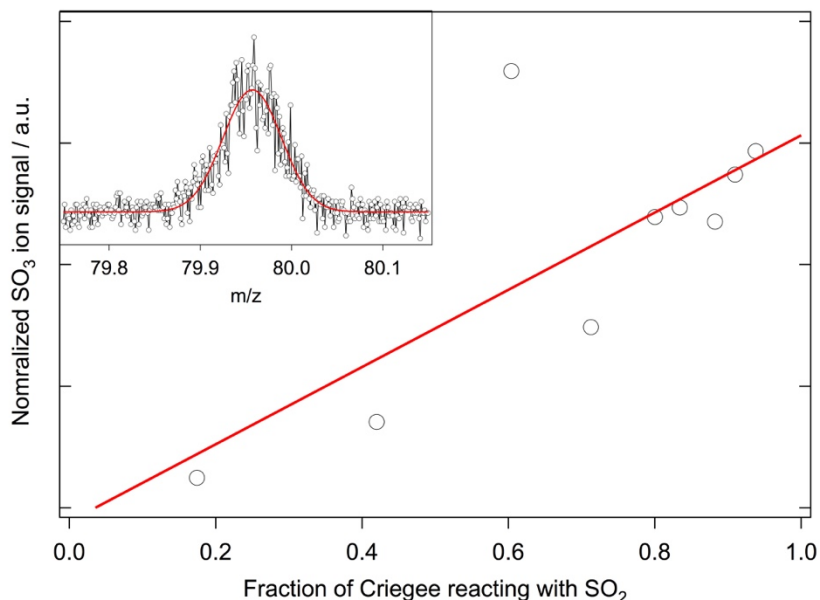

**Fig. S3.** Linear relationship of SO<sub>3</sub> amplitude, (summed over the kinetic time of 0-60 ms), and the estimated fraction of MVK-oxide reacting with SO<sub>2</sub>. SO<sub>3</sub> data were obtained via MPIMS at a photoionization energy of 13 eV, using the absorption experiment bimolecular rate coefficient of  $3.9 \times 10^{-11} \text{ cm}^3 \text{ s}^{-1}$  and assuming a first-order loss of 300 s<sup>-1</sup>, consistent with the Sandia broadband multi-pass transient absorption experiment data and previous MPIMS experiments of Criegee intermediate chemistry. A Gaussian fit to m/z 80 to determine the exact mass is shown in the inset. The Gaussian fit retrieved a mass value of  $(79.957 \pm 0.007) \text{ amu}$  consistent with the exact m/z of SO<sub>3</sub> (79.95683 amu).

**Ab initio calculations, computational kinetics and mechanistic investigations.** For the reaction of MVK-oxide with SO<sub>2</sub>, *ab initio* kinetics calculations were performed in order to gain a better understanding of the expected temperature- and pressure-dependencies of both the rate coefficient and product branching. The experimental observation that the rate coefficient is independent of pressure suggests that the rate is governed by the capture rate for the formation of the initial complex. However, there may still be strong temperature- and pressure-dependencies to the branching between stabilization of this complex and formation of bimolecular products (primarily SO<sub>3</sub> + methyl vinyl ketone (MVK)). This branching has significant ramifications for the net SO<sub>3</sub> formation rate.

To our best knowledge, there are no prior theoretical studies of the reaction of SO<sub>2</sub> with MVK-oxide. However, there is considerable prior work on the reaction of SO<sub>2</sub> with CH<sub>2</sub>OO (36-40) and many of the conclusions from those studies are relevant to the reaction with MVK-oxide. These prior studies examined a great variety of possible pathways, with the quantitative analysis of the kinetics complicated by the present of both diradical and concerted pathways. Unfortunately, quantitative predictions for such diradical channels generally require multi-reference electronic structure treatments. A similar competition between diradical and concerted pathways arises in the ozonolysis of Criegee intermediates, as discussed for example in the recent analysis of the dynamics of Criegee intermediate stabilization for the ozonolysis of ethylene by Pfeifle *et al.* (41).

A particularly detailed exploration of the kinetics was provided in the recent study of Kuwata *et al.* (40). For simplicity, in this first analysis, we restrict our attention to the analogue of the dominant pathway from their study. In particular, we consider the addition to form both *endo* and *exo* van der Waals complexes (MVKO...SO<sub>2</sub>) (3a/3b in the notation of Kuwata *et al.*), the conversion of these complexes to secondary ozonides (SOZ) (via TS-4a/TS-4b to 5a/5b), the interconversion of *endo/exo* forms (via TS-6), but with the loss of symmetry now yielding different secondary ozonides (SOZ'), and then dissociation of SOZ' to SO<sub>3</sub> + MVK (via TS7a/TS7b). (Again, MVK-oxide is often denoted in shorthand as MVKO.)

The energetics along these pathways were calculated for both *syn-trans*- and *syn-cis*-MVK-oxide at the CCSD(T)/CBS//B2PLYP-D3/cc-pVTZ level. The CBS extrapolation is based on calculations with Dunning's tight d supplemented correlated consistent basis sets [cc-pV(n+d)Z] (42). A correction for higher order electronic excitation was estimated from CCSDT(Q)/6-31G\* calculations for related aspects of the CH<sub>2</sub>OO + SO<sub>2</sub> system. In particular, we estimate higher level corrections of 0.41, 0.80, 1.49, -0.72, and 1.23 kcal mol<sup>-1</sup> for the van der Waals minima, the transition state from the van der Waals minima to the SOZ, the SOZ, the transition state from the SOZ to SO<sub>3</sub> + MVK, and the products SO<sub>3</sub> + MVK, respectively. The calculated stationary point energies are reported in Table S5 and a schematic illustration of the reaction pathways is provided in Figure S4.

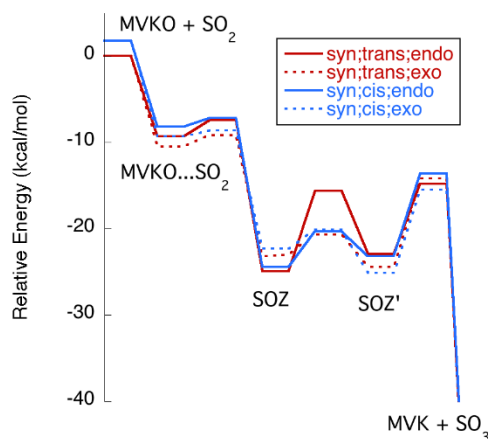

**Fig. S4.** Schematic plot of the expected lowest energy path for the reaction of MVK-oxide (denoted MVKO here) with SO<sub>2</sub> (cf., Table S5). Note that the *exo/endo* labeling is based on the structures of the first two complexes. The conversion to the SOZ' actually reverses this labeling, which is not accounted for in this plot. In particular, for SOZ and SOZ' the *endo* forms are lower in energy.

**Table S5.** Stationary point energies (kcal mol<sup>-1</sup>) for the reaction of SO<sub>2</sub> with *syn*-MVK-oxide.<sup>a</sup>

| Species                             | B2PLYP-D3 <sup>b</sup> |       | CCSD(T) <sup>c</sup> |       |       | E <sub>0</sub> <sup>d</sup> | Total <sup>e</sup> | Total <sup>f</sup> | T1 <sup>g</sup> |
|-------------------------------------|------------------------|-------|----------------------|-------|-------|-----------------------------|--------------------|--------------------|-----------------|
|                                     | TZ                     | DZ    | TZ                   | QZ    | CBS   | B2/TZ                       |                    | +Corr.             |                 |
| <i>syn-trans</i> + SO <sub>2</sub>  | 0.0                    | 0.0   | 0.0                  | 0.0   | 0.0   | 0.0                         | 0.0                | 0.0                | 0.035<br>0.022  |
| <i>trans; endo<sup>h</sup></i>      |                        |       |                      |       |       |                             |                    |                    |                 |
| MVKO;st...SO <sub>2</sub>           | -12.4                  | -9.4  | -9.8                 | -10.6 | -11.1 | 1.4                         | -9.7               | -9.3               | 0.027           |
| MVKO;st ...SO <sub>2</sub> =<br>SOZ | -11.1                  | -7.4  | -8.4                 | -9.3  | -10.0 | 1.8                         | -8.2               | -7.4               | 0.024           |
| SOZ                                 | -26.1                  | -25.8 | -28.9                | -29.1 | -29.2 | 2.9                         | -26.4              | -24.9              | 0.017           |
| SOZ=SOZ'                            | -16.5                  | -14.7 | -18.5                | -19.0 | -19.4 | 2.4                         | -17.0              | -15.6              | 0.017           |
| SOZ'                                | -24.6                  | -24.6 | -27.0                | -27.1 | -27.2 | 2.8                         | -24.4              | -22.9              | 0.018           |
| SOZ' = MVK + SO <sub>3</sub>        | -12.8                  | -11.0 | -14.3                | -15.0 | -15.4 | 1.3                         | -14.1              | -14.8              | 0.026           |
| MVK + SO <sub>3</sub>               | -64.3                  | -64.2 | -70.3                | -71.3 | -72.0 | 1.1                         | -70.8              | -69.6              | 0.014<br>0.019  |
| <i>trans; exo<sup>h</sup></i>       |                        |       |                      |       |       |                             |                    |                    |                 |
| MVKO;st ...SO <sub>2</sub>          | -14.1                  | -11.1 | -11.4                | -12.0 | -12.4 | 1.6                         | -10.9              | -10.5              | 0.027           |
| MVKO;st ...SO <sub>2</sub> =<br>SOZ | -13.1                  | -9.9  | -10.7                | -11.4 | -11.9 | 1.9                         | -10.0              | -9.2               | 0.024           |
| SOZ                                 | -24.9                  | -24.7 | -27.3                | -27.5 | -27.6 | 2.8                         | -24.7              | -23.2              | 0.017           |
| SOZ=SOZ'                            | -21.9                  | -21.6 | -24.6                | -24.7 | -24.8 | 2.6                         | -22.2              | -20.7              | 0.017           |
| SOZ'                                | -25.6                  | -25.6 | -28.4                | -28.6 | -28.7 | 2.8                         | -25.9              | -24.4              | 0.017           |
| SOZ' = MVKO + SO <sub>3</sub>       | -12.2                  | -10.7 | -13.8                | -14.5 | -14.9 | 1.4                         | -13.5              | -14.2              | 0.026           |
| MVKO + SO <sub>3</sub>              | -64.3                  | -64.2 | -70.3                | -71.3 | -72.0 | 1.1                         | -70.8              | -69.6              | 0.014           |
| <i>syn-cis</i> + SO <sub>2</sub>    | 2.3                    | 1.3   | 1.8                  | 2.0   | 2.02  | -0.2                        | 1.8                | -                  | 0.037           |
| <i>cis; endo<sup>h</sup></i>        |                        |       |                      |       |       |                             |                    |                    |                 |
| MVKO;sc ...SO <sub>2</sub>          | -11.5                  | -8.8  | -8.9                 | -9.5  | -10.0 | 1.4                         | -8.6               | -8.2               | 0.028           |
| MVKO;sc ...SO <sub>2</sub> =<br>SOZ | -10.9                  | -8.0  | -8.4                 | -9.1  | -9.6  | 1.6                         | -8.0               | -7.2               | 0.024           |
| SOZ                                 | -25.6                  | -25.7 | -28.5                | -28.6 | -28.6 | 2.7                         | -25.9              | -24.4              | 0.017           |
| SOZ=SOZ'                            | -21.4                  | -20.9 | -24.1                | -24.2 | -24.2 | 2.5                         | -21.8              | -20.3              | 0.017           |
| SOZ'                                | -24.7                  | -24.4 | -27.0                | -27.3 | -27.4 | 2.6                         | -24.7              | -23.2              | 0.017           |
| SOZ' = MVKO + SO <sub>3</sub>       | -11.4                  | -10.0 | -13.1                | -13.7 | -14.2 | 1.3                         | -12.9              | -13.6              | 0.026           |
| MVKO + SO <sub>3</sub>              | -64.0                  | -64.5 | -70.0                | -70.8 | -71.4 | 1.0                         | -70.4              | -69.2              | 0.014           |
| <i>cis; exo<sup>h</sup></i>         |                        |       |                      |       |       |                             |                    |                    |                 |
| MVKO;sc ...SO <sub>2</sub>          | -12.6                  | -10.0 | -10.1                | -10.7 | -11.2 | 1.4                         | -9.7               | -9.3               | 0.028           |
| MVKO;sc ...SO <sub>2</sub> =<br>SOZ | -12.2                  | -9.3  | -9.9                 | -10.6 | -11.1 | 1.7                         | -9.4               | -8.6               | 0.025           |
| SOZ                                 | -23.9                  | -24.0 | -26.4                | -26.5 | -26.5 | 2.7                         | -23.8              | -22.3              | 0.017           |
| SOZ=SOZ'                            | -21.3                  | -21.2 | -24.1                | -24.1 | -24.2 | 2.5                         | -21.6              | -20.1              | 0.017           |
| SOZ'                                | -26.2                  | -26.1 | -29.0                | -29.2 | -29.3 | 2.7                         | -26.6              | -25.1              | 0.017           |
| SOZ' = MVKO + SO <sub>3</sub>       | -13.6                  | -12.3 | -15.2                | -15.8 | -16.2 | 1.4                         | -14.8              | -15.5              | 0.026           |
| MVKO + SO <sub>3</sub>              | -64.0                  | -64.5 | -70.0                | -70.8 | -71.4 | 1.0                         | -70.4              | -69.2              | 0.014           |

|                                                                 |       |       |       |       |       |     |       |       |       |
|-----------------------------------------------------------------|-------|-------|-------|-------|-------|-----|-------|-------|-------|
| <i>syn,trans</i> = <i>syn,cis</i> ;<br><i>endo</i> <sup>h</sup> |       |       |       |       |       |     |       |       |       |
| MVKO...SO <sub>2</sub>                                          | -5.6  | -3.9  | -3.6  | -4.4  | -4.9  | 1.0 | -3.8  | -3.4  | 0.024 |
| MVKO...SO <sub>2</sub> ; geom. B                                | -4.5  | -2.6  | -2.7  | -3.4  | -3.9  | 0.7 | -3.2  | -2.8  | 0.024 |
| B                                                               |       |       |       |       |       |     |       |       |       |
| SOZ                                                             | -23.6 | -23.4 | -26.5 | -26.7 | -26.8 | 2.5 | -24.3 | -22.8 | 0.017 |
| SOZ; geom. B                                                    | -23.9 | -23.8 | -26.7 | -27.0 | -27.1 | 2.5 | -24.6 | -23.1 | 0.017 |
| <hr/>                                                           |       |       |       |       |       |     |       |       |       |
| <i>syn,trans</i> = <i>syn,cis</i> ;<br><i>exo</i> <sup>h</sup>  |       |       |       |       |       |     |       |       |       |
| MVKO...SO <sub>2</sub>                                          | -7.4  | -5.8  | -5.6  | -6.3  | -6.7  | 1.1 | -5.6  | -5.2  | 0.024 |
| SOZ                                                             | -23.1 | -23.0 | -25.5 | -25.7 | -25.8 | 2.6 | -23.2 | -21.7 | 0.018 |
| SOZ; geom. B                                                    | -23.2 | -23.2 | -25.7 | -25.8 | -25.9 | 2.6 | -23.3 | -21.9 | 0.017 |

<sup>a</sup>All energies are relative to *syn-trans*-MVK-oxide (denoted MVKO) + SO<sub>2</sub>. <sup>b</sup>B2PLYP-D3/cc-pVTZ electronic energies. <sup>c</sup>CCSD(T) electronic energies for the cc-pVDZ, cc-pVTZ, cc-pVQZ and an estimate of the CBS limit. <sup>d</sup>B2PLYP-D3/cc-pVTZ vibrational zero-point energy. <sup>e</sup>The total energy taken as the sum of the CCSD(T)/CBS//B2PLYP-D3/cc-pVTZ energy and the B2PLYP-D3/cc-pVTZ zero-point energy. <sup>f</sup>The total energy corrected by estimated T(Q) corrections obtained from CCSDT(Q)/6-31G\* calculations for related geometries in the CH<sub>2</sub>OO + SO<sub>2</sub> system. <sup>g</sup>The T1 diagnostic. <sup>h</sup>The pathways are labeled as *exo/endo* according to the initial van der Waals complex (MVKO...SO<sub>2</sub>) and SOZ. The transition from SOZ to SOZ' converts between the *endo* and *exo* forms.

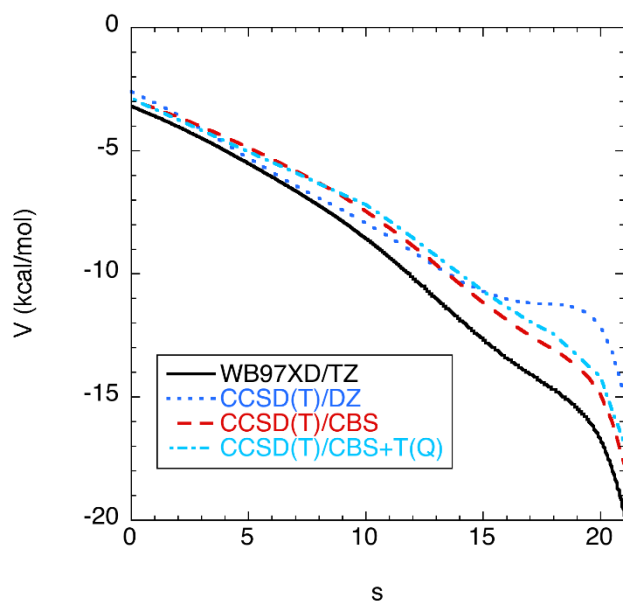

**Figure S5.** Plot of the minimum energy path (MEP) potential for the addition of SO<sub>2</sub> to *syn-trans*-MVK-oxide evaluated at various levels, all along the  $\omega$ B97XD/cc-pVTZ minimum energy potential (MEP).

For the SO<sub>2</sub> + CH<sub>2</sub>OO system, there has been some debate as to whether or not there is a saddle point for the formation of the long-range van der Waals complex. We examined this question herein via calculations along the minimum energy path determined at the  $\omega$ B97XD/cc-pVTZ level. Interestingly, calculations at the CCSD(T)/CBS// $\omega$ B97XD/cc-pVTZ level show no saddle point, even with the inclusion of a CCSDT(Q)/6-31G\* correction. This finding strongly suggests that there is no saddle point for this reaction.

Notably, the resonance stabilization in MVK-oxide changes the picture for reaction with SO<sub>2</sub> (Figure S5). In particular, we now find a saddle point with an imaginary frequency in the 100-200 cm<sup>-1</sup> range for each of the  $\omega$ B97XD/6-31+G\*,  $\omega$ B97XD/cc-pVTZ, and B2PLYP-D3/cc-pVTZ methods for both *syn-trans* and *syn-cis* isomers and for *endo* and *exo* pathways (Table S5). The resonance stabilization also decreases

the depth of the SOZ and SOZ' wells relative to reactants from  $\sim 35$  kcal mol $^{-1}$  for CH $_2$ OO to  $\sim 24$  kcal mol $^{-1}$  for MVK-oxide.

We used direct sampling *ab initio* variable reaction coordinate transition state theory (VRC-TST) to explore the rate coefficient for forming the van der Waals complex. For this VRC-TST analysis, we considered four separate electronic structure methods (MP2/cc-pVDZ, MP2/cc-pVTZ,  $\omega$ B97XD/6-31+G\*, and  $\omega$ B97XD/cc-pVTZ) finding only modest variation ( $\sim 20\%$  near room temperature) in the predicted long-range capture rate coefficient, as illustrated in Figure S6. The reaction coordinate was presumed to be defined by the separation between the two centers-of-mass of the two fragments and the separation was constrained to 4.2 Å and larger. A dynamical correction factor of 0.85, based on reference comparisons of trajectories and TST (43) is included.

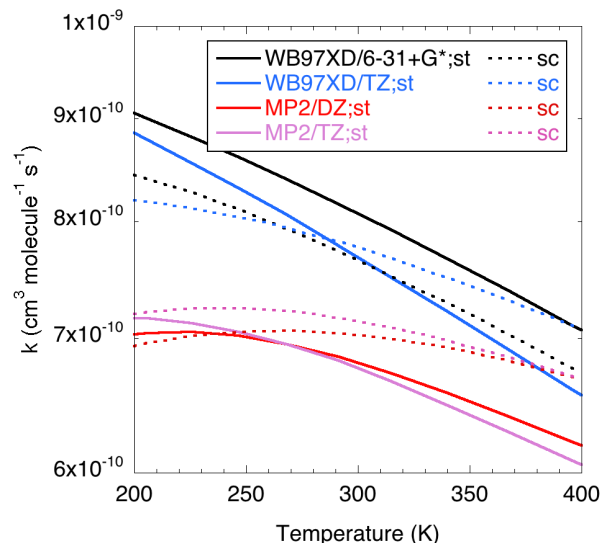

**Fig. S6.** Plot of the VRC-TST predicted rate coefficient for the high-pressure addition of SO $_2$  to *syn-trans* (st) and *syn-cis* (sc) MVK-oxide evaluated with four different *ab initio* methods.

The pressure-dependence of branching between stabilization and SO $_3$  + MVK formation was explored through an *ab initio* transition state theory-based master equation (AITSTME) model for the overall kinetic process. This master equation model employs standard exponential down energy transfer probabilities, with a temperature-dependent expression for the average downwards energy transferred given by  $\langle \Delta E_{\text{down}} \rangle = 400 (T/298)^{0.85}$  cm $^{-1}$  and a Lennard-Jones collision rate appropriate for collision with N $_2$ . As part of this analysis we presume rapid equilibration of the *endo* and *exo* forms of both the MVKO;st ... SO $_2$  and MVKO;sc ... SO $_2$  van der Waals complexes. The entrance channel flux is obtained from the MP2/cc-pVTZ VRC-TST calculations, while the flux for the other channels are obtained from the T(Q) corrected CCSD(T)/CBS//B2PLYP-D3/cc-pVTZ analysis employing rigid-rotor harmonic oscillator (RRHO) treatments for all but the CH $_3$  rotors, which are treated as one-dimensional hindered rotors.

The AITSTME predictions for the SO $_2$  + MVK-oxide rate coefficients are illustrated in Figures S7 (a) and (b) for the *syn,trans*- and *syn,cis*- forms of MVK-oxide, respectively. As noted in the main text, the total rate coefficient is predicted to be effectively pressure-independent, with no back reaction from the SOZ to the reactants. However, there is predicted to be a fairly strong temperature-dependence due to the effect of the TS connecting the van der Waals complexes and the SOZ. The total rate coefficients for the *syn,trans*- and *syn,cis*- forms are well reproduced by the expressions  $2.3 \times 10^9 T^{-7.28} \exp(-1031/T)$  and  $2.5 \times 10^{10} T^{-7.50} \exp(-1202/T)$  cm $^3$  s $^{-1}$  for temperatures ranging from 200 to 400 K. At 300 K the *syn,trans*- and *syn,cis*- rates coefficients are predicted to be  $6.5 \times 10^{-11}$  and  $1.2 \times 10^{-10}$  cm $^3$  s $^{-1}$ , respectively.

The total rate coefficient predicted for the *syn,trans* isomer is a factor of 1.7 larger than the value observed experimentally for the thermal average ( $3.9 \times 10^{-11}$  cm $^3$  s $^{-1}$ ). This modest overprediction may indicate either the need for a variational treatment of the TS from the van der Waals complex to SOZ, or shortcomings in the electronic energies of that saddle point. The former may be quite significant because the submerged nature of the saddle point implies that the variational deviation from the saddle point can

be quite significant even at low temperature. Furthermore, this TS effectively corresponds to that for an addition process, which commonly have significant variational effects. Meanwhile, a simple increase by  $0.5 \text{ kcal mol}^{-1}$  for each of the saddle point energies (roughly the expected uncertainty) for the TSs connecting the van der Waals complexes to the SOZ reduces the predicted *syn,trans* rate coefficient to  $4.6 \times 10^{-11} \text{ cm}^3 \text{ s}^{-1}$  at room temperature and 1 atm. Further explorations of the reason for this modest overprediction are left for future work.

The decreased stability reduces the possibility for stabilization of the SOZ prior to decomposition to  $\text{SO}_3$ , whilst the additional vibrational degrees of freedom increases it. Nevertheless, for pressures below 1 atm the branching to stabilized SOZ is predicted to be negligible, while by 10 atm the stabilization amounts to  $\sim 50\%$  of the overall reaction. Ambiguity in the energy transfer parameters suggests that even at 1 atm there may be some stabilization of the SOZ.

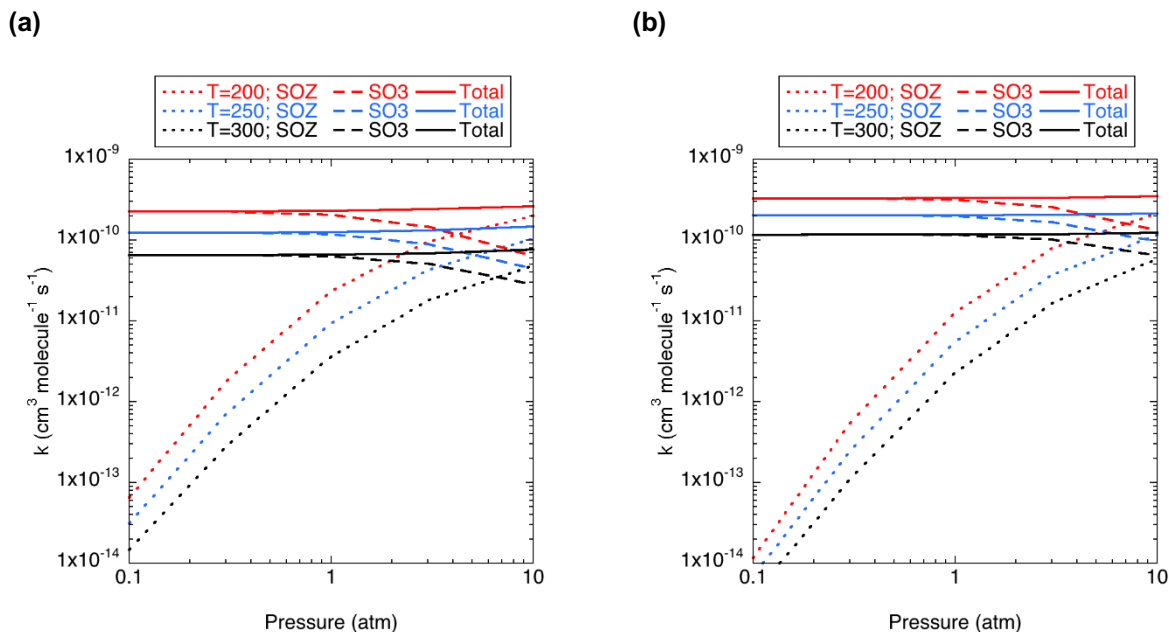

**Fig. S7.** The predicted temperature- and pressure-dependencies of the total rate coefficient, the rate coefficient to form any of the SOZ, and the rate coefficient to form  $\text{SO}_3 + \text{MVK}$  for the reaction of (a) *syn-trans*-MVK-oxide with  $\text{SO}_2$  and (b) *syn-cis*-MVK-oxide with  $\text{SO}_2$ .



### 3.3 MVK-oxide + formic acid.

**Ionization energy calculations of the reaction product.** A variety of theoretical calculations were performed to complement the experimental observations of the ionization of the MVK-oxide + formic acid reaction product. These analyses included density functional theory (DFT) based conformational analyses of  $C_5H_8O_4$ , CCSD(T) based calculations of the vertical ionization energies for the different conformers, DFT evaluations of the relaxation energies for the vertically excited ions (and thus adiabatic ionization energies), a DFT mapping of an ion dissociation path, and a CCSD(T) based calculation of the daughter appearance energy for the ground conformer.

In analogy with calculations for the  $CH_2OO$  + formic acid reaction, the reaction product was presumed to be 2-hydroperoxybut-3-en-2-yl formate ( $CH_2CHC(CH_3)OCHO$ , HPBF), as shown in Scheme 5 of the main text (44). The low energy conformers of this species were determined through random sampling of 200 sets of the 6 torsional angles followed by  $\omega$ B97XD/6-31+G\* (45) geometry optimizations for each starting geometry. This optimization was performed in two steps, with first just the torsional angles optimized, and then the full set of internal coordinates optimized. The resulting set of 9 conformers that had energies within  $3.5 \text{ kcal mol}^{-1}$  of the ground state conformer were then reoptimized at the B2PLYP-D3/cc-pVTZ level (46). The vertical ionization energies for the set of 9 conformers with energies within  $3 \text{ kcal mol}^{-1}$  of the ground state were evaluated as the sum: CCSD(T)-F12b/cc-pVDZ-F12 + MP2-F12/cc-pVTZ-F12 – MP2-F12/cc-pVDZ-F12, which is meant to approximate the CCSD(T)-F12b/cc-pVTZ-F12//B2PLYP-D3/cc-pVTZ level (47). These values are reported in Table S6. For the ground conformer, the appearance energy for the daughter ion (obtained by simply pulling off the  $HO_2$  and then allowing the  $C_5H_7O_2^+$  structure to relax) is predicted to be  $9.82 \text{ eV}$  using the methodology above to approximate the CCSD(T)-F12b/cc-pVTZ-F12//B2PLYP-D3/cc-pVTZ level of theory.

**Table S6.** Energies of relevance to the ionization of HPBF.

| HPBF conformer | Conformer energy (kcal mol <sup>-1</sup> ) <sup>a</sup> | Vertical excitation (eV) <sup>b</sup> | Relaxation energy (kcal mol <sup>-1</sup> ) |
|----------------|---------------------------------------------------------|---------------------------------------|---------------------------------------------|
| 1              | 0.0                                                     | 10.41 (10.70)                         | 33.1                                        |
| 2              | 0.6                                                     | 10.37 (10.80)                         | 31.5                                        |
| 3              | 1.0                                                     | 10.31 (10.47)                         | 29.6                                        |
| 4              | 1.7                                                     | 10.48 (10.71)                         | 36.1                                        |
| 5              | 2.2                                                     | 10.13 (10.39)                         | 54.5                                        |
| 6              | 3.                                                      | 10.10                                 | 35.9                                        |
| 7              | 3.1                                                     | 10.52                                 | 42.6                                        |
| 8              | 3.1                                                     | 10.76                                 | 48.4                                        |
| 9              | 3.2                                                     | 10.14                                 | 36.8                                        |

<sup>a</sup>B2PLYP-D3/cc-pVTZ calculated zero-point corrected energy of the given conformer relative to the ground conformer.

<sup>b</sup>B2PLYP-D3/cc-pVTZ and approximate CCSD(T)-F12b/cc-pVTZ-F12 vertical electronic excitation energies for the given conformer. The latter energies are given in parentheses, and were obtained from the sum: CCSD(T)-F12b/cc-pVDZ-F12 + MP2-F12/cc-pVTZ-F12 – MP2-F12/cc-pVDZ-F12, all evaluated at the B2PLYP-D3/cc-pVTZ geometries.

<sup>c</sup>B2PLYP-D3/cc-pVTZ calculated relaxation energies for the parent cation (from the vertically excited geometry to the optimized geometry).

The relaxation of the HPBF<sup>+</sup> ions was explored for each of the 9 lowest neutral conformers through B2PLYP-D3/cc-pVTZ optimizations of the ion initiated at the neutral geometry. In each case the calculated relaxation energy exceeds  $29 \text{ kcal mol}^{-1}$  and the relaxation involves substantial geometrical transformations. For the ground state, the relaxation energy is  $33 \text{ kcal mol}^{-1}$ . For such large relaxations, adiabatic ionization will have very poor Franck-Condon overlaps resulting in low experimental signals at the adiabatic threshold. Instead, the ionization process is likely to be dominated by nearly vertical transitions.

Notably, the vertical ionization states have energies that substantially exceed the threshold for C-O fission to produce  $HO_2$  +  $CH_2CHC(CH_3)OCHO^+$ . A schematic plot of the minimum energy path for dissociation of one conformer of the HPBF<sup>+</sup> ions is provided in Figure S8. This minimum energy path was mapped through constrained optimizations (with the CO distance fixed) at the  $\omega$ B97XD/6-31+G\* level. For this conformer, the daughter ion is  $16 \text{ kcal mol}^{-1}$  below the vertical excitation energy. Furthermore, CO fission

from the adiabatic minimum requires only 13 kcal mol<sup>-1</sup>, suggesting that the dissociation of that parent ion should be rapid. At the B2PLYP-D3/cc-pVTZ level the HPBF<sup>+</sup> vertical excitation states for the 9 lowest conformers range from 17 to 33 kcal mol<sup>-1</sup> higher than the ground state of HO<sub>2</sub> + CH<sub>2</sub>CHC(CH<sub>3</sub>)OCHO<sup>+</sup>. Thus, it is expected that the ionization process will directly produce CH<sub>2</sub>CHC(CH<sub>3</sub>)OCHO<sup>+</sup> (HO<sub>2</sub>-loss) daughter ions, as is observed experimentally (Figure 5, main text). The correlation between the energy of the observed rise in the daughter ion signal and the calculated vertical ionization energies further suggests that the ionization process primarily involves nearly vertical transitions.

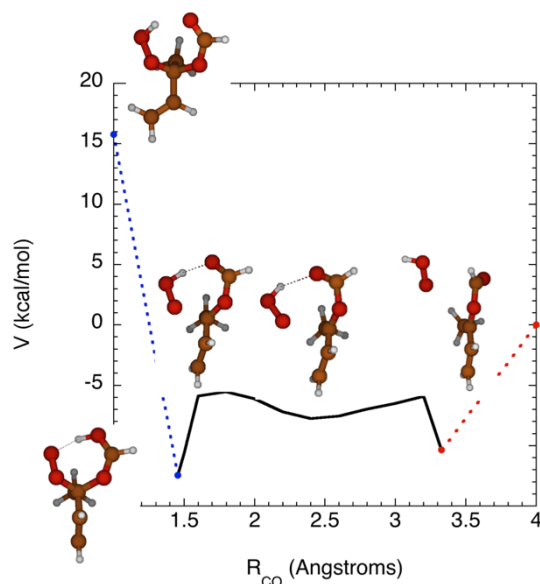

**Fig. S8.** Schematic plot of the process from vertical excitation of HPBF<sup>+</sup> through to CO fission to product HO<sub>2</sub> + CH<sub>2</sub>CHC(CH<sub>3</sub>)OCHO<sup>+</sup>.

**Kinetics calculations of MVK-oxide + formic acid.** For the reaction of MVK-oxide with formic acid, it is interesting to ponder why the experimentally observed rate coefficient is so large and yet not quite as large as what one would predict on the basis of long-range capture theory. Understanding this behavior has important ramifications for the expected temperature- and pressure-dependencies of the rate coefficient. One possibility is that this reduction from the long-range capture rate is indicative of the effect of entropic loss in the transition state for formation of the initial chemically bound complex. In this case, one would expect the rate coefficient to be nearly independent of temperature and pressure. Alternatively, the reduction may arise from redissociation of the initial formed complex back to reactants. This would culminate in significant temperature- and pressure-dependencies. To interrogate these possibilities, we must examine in detail both the overall reaction pathway as well as the minimum energy path potential for the initial formation of the complex.

There are a variety of possible reaction channels for the reaction of formic acid with CIs, as discussed, for example, in a recent study by Vereecken (44), where the reaction of CH<sub>2</sub>OO with formic acid was considered in detail. Vereecken found that the primary reaction pathway involves H-transfer from the acid to the CI in concert with CO bond formation, followed by stabilization of the resulting functionalized hydroperoxide, hydroperoxymethyl formate (HPMF). Notably, even though there are exothermic exit channels arising from OO bond fission of the complex, stabilization was predicted to dominate over bimolecular product formation. Addition over the C=O bond to form a cyclic ozonide was found to have a submerged barrier, however, the TS for this pathway was very tight, and the corresponding addition rate was predicted to be quite small ( $\sim 10^{-13}$  cm<sup>3</sup> s<sup>-1</sup>). By contrast, *ab initio* variational TST calculations predicted the pathway to form the functionalized hydroperoxide has a rate coefficient of  $1.0 \times 10^{-10}$  cm<sup>3</sup> s<sup>-1</sup> - in excellent accord with the experimentally observed value of  $1.1 \times 10^{-10}$  cm<sup>3</sup> s<sup>-1</sup> (25).

For the reaction of MVK-oxide with formic acid we restricted our attention to the analogue of Vereecken's predicted primary reaction pathway for CH<sub>2</sub>OO based on the previous work described above. We find that, notably, the resonance stabilization in MVK-oxide leads to a significant destabilization of the

functionalized hydroperoxide pathway relative to reactants. A schematic illustration of the CCSD(T)-F12/cc-pVTZ-F12//B2PLYPD3/cc-pVTZ predicted reaction path energies is shown in the main text (Figure 6) and the corresponding energies are provided in Table S7.

The initial approach along the reaction co-ordinate leads to a planar van der Waals complex, which is a minimum at some levels of theory and a saddle point at others (see Table S7). Proceeding on from there leads to a clear long-range minimum followed by a well-defined (imaginary frequency of 598 cm<sup>-1</sup>), but strongly submerged, saddle point that separates the global long-range minimum from the functionalized hydroperoxide product, HPBF. As discussed in the main text, HPBF is much more weakly bound than in its CH<sub>2</sub>OO analogue (30 vs. 44 kcal mol<sup>-1</sup> (44)), due to the additional resonance stabilization present in MVK-oxide. Correspondingly, the OO fission pathway of HPBF to produce OH + an alkoxy radical is now significantly endothermic relative to initial reactants. Nevertheless, as discussed below, the overall kinetics is predicted to be quite similar, with the reaction dominated by direct addition to form the functionalized hydroperoxide species.

**Table S7.** Reaction path energies for the reaction of *syn-trans*-MVK-oxide with formic acid.<sup>a</sup>

| Species                                                 | R <sub>CO</sub><br>(Å) | B2PLYP-D3 <sup>b</sup><br>TZ | E0 <sup>c</sup><br>B2/TZ | CCSD(T)-F12 <sup>d</sup><br>cc-pVTZ-F12 | Total <sup>e</sup> | T1 <sup>f</sup> |
|---------------------------------------------------------|------------------------|------------------------------|--------------------------|-----------------------------------------|--------------------|-----------------|
| <i>syn-trans</i> + OCHOH                                | -                      | 0.0                          | 0.0                      | 0.0                                     | 0.0                | -               |
| <i>syn-trans</i> ...OCHOH (long-range C <sub>s</sub> )  | 5.68                   | -11.7                        | 0.9                      | -10.8                                   | -9.9               | 0.027           |
| <i>syn-trans</i> ...OCHOH (short-range C <sub>1</sub> ) | 2.89                   | -17.0                        | 1.1                      | -15.8                                   | -14.7              | 0.024           |
| <i>syn-trans</i> ...OCHOH=<br>vinyl hydroperoxide       | 2.26                   | -14.5                        | -0.9                     | -12.6                                   | -13.5              | 0.020           |
| HPBF                                                    | 1.48                   | -30.8                        | 2.8                      | -33.0                                   | -30.3              | 0.015           |
| alkoxy + OH                                             | -                      | 17.7                         | -2.7                     | 16.6                                    | 13.4               | 0.019           |

<sup>a</sup> All energies are in kcal mol<sup>-1</sup> relative to *syn-trans*-MVK-oxide + formic acid.

<sup>b</sup> Stationary point electronic energy from B2PLYP-D3//cc-pVTZ calculations.

<sup>c</sup> Zero-point energy (ZPE) from B2PLYP-D3//cc-pVTZ calculations.

<sup>d</sup> CCSD(T)-F12b/cc-pVTZ-F12 B2PLYP-D3/cc-pVTZ electronic energies.

<sup>e</sup> Sum of CCSD(T)-F12b/cc-pVTZ-F12// B2PLYP-D3/cc-pVTZ energies and B2PLYP-D3/cc-pVTZ ZPEs.

<sup>f</sup> T1 diagnostic for the CCSD(T)-F12b/cc-pVTZ-F12// B2PLYP-D3/cc-pVTZ calculations.

There are now three distinct regions of the potential energy surface that may provide the kinetic bottleneck for the addition process, as illustrated in Figure S9. The longer-range portion of the MEP (labelled A in Figure S9) was derived from the minimum center-of-mass constrained sampling of random orientations of the two reactants. The two shorter ranged portions (B and C in Figure S9) of the MEPs were derived from reaction path following initiated at the larger of the separations on that portion of the curve. At low temperatures, the longest ranged portion (A in Figure S9) of the curve provides the greatest bottleneck, while at higher temperatures the saddle point region (C in Figure S9), which occurs at a CO separation of 2.27 Å, should provide the dominant bottleneck due to its lower entropy. However, the deeply submerged nature of this saddle point (i.e., with a ZPE corrected energy of -13.5 kcal mol<sup>-1</sup>) suggests that this bottleneck may only become important at quite high temperature. The intermediate regime (B in Figure S9) may also provide an important bottleneck at intermediate temperatures.

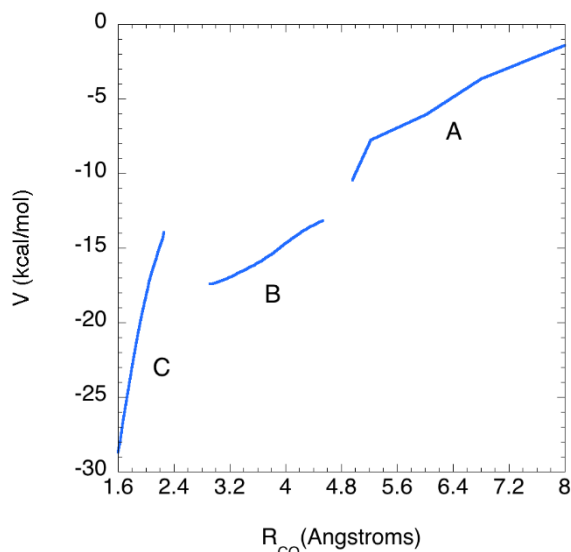

**Fig. S9.** The  $\omega$ B97XD/6-31+G\* calculated minimum energy path (MEP) for the addition of formic acid to the syn-trans form of MVK-oxide. The three disjoint curves correspond to physically distinct aspects of the addition process.

We have used direct sampling *ab initio* variable reaction coordinate transition state theory to explore the effect of the long-range bottleneck on the addition kinetics. For this VRC-TST analysis, we considered four separate electronic structure methods (MP2/cc-pVDZ, MP2/cc-pVTZ,  $\omega$ B97XD/6-31+G\*, and  $\omega$ B97XD/cc-pVTZ) finding only modest variation ( $\sim 10\%$  near room temperature) in the predicted long-range capture rate coefficient, as illustrated in Figure S10. For these calculations, the reaction coordinate was presumed to be defined by the separation between the two centers-of-mass of the two fragments and the separation was constrained to 4.2 Å and larger. A dynamical correction factor of 0.85, based on reference comparisons of trajectories and TST (43), is also included.

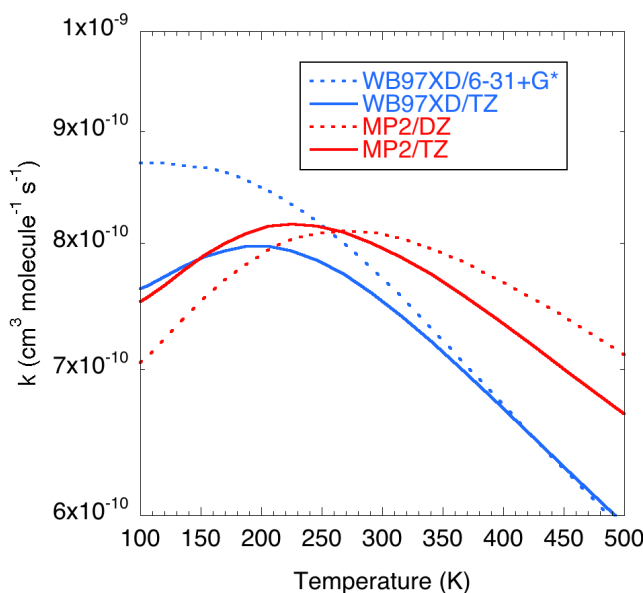

**Fig. S10.** Temperature-dependence of the predicted VRC-TST rate coefficients for capture to form the van der Waals complex, calculated using four different levels of theory.

Notably, the predicted room-temperature long-range capture rate coefficient of  $\sim 8 \times 10^{-10} \text{ cm}^3 \text{ s}^{-1}$  is considerably greater than what might be expected on the basis of dipole-dipole capture theory. This is likely due to additional contributions from dispersion interactions. Furthermore, this value is about 3 times larger than that observed experimentally ( $(3.0 \pm 0.1) \times 10^{-10} \text{ cm}^3 \text{ s}^{-1}$ ). Related calculations for addition to *syn-cis*-MVK-oxide yield essentially identical predictions for the capture rate (i.e., differing by 10% or less).

From our experience, we would expect uncertainties in the VRC-TST predictions to be on the order of 10-20%. Thus, the apparent overprediction of the rate coefficient suggests that some other bottleneck is operative. The effect of the two inner transition state regions (B and C in Figure S9) were included here through microcanonical (E-resolved) variational TST implementing  $\omega$ B97XD/6-31+G\* based evaluations of the minimum energy path properties coupled with CCSD(T)-F12/cc-pVTZ-F12 evaluation of the energy for the starting point on the path. For simplicity, the vibrational modes were all treated as harmonic oscillators, aside from the CH<sub>3</sub> rotor, which was treated as a 1-dimensional hindered rotor in both the reactants and the transition. The inclusion of such variational TST treatments for the two separate inner bottlenecks leads to only a modest reduction in the predicted formation rate coefficient for HPBF. For example, at 300 K the predicted recombination rate coefficient at 10 bar is now  $5.0 \times 10^{-10} \text{ cm}^3 \text{ s}^{-1}$ . Although, there is considerably greater uncertainty in our estimate of the effect of these inner transition state regions, it still appears that there must be another bottleneck to HPBF formation. One possibility is that there is substantial back dissociation of the initially formed HPBF. To explore this issue, we have implemented an *ab initio* transition state theory-based master equation model for the overall kinetic process. This master equation model employs standard exponential down energy transfer probabilities with a temperature dependent expression for the average downwards energy transferred given by  $\langle \Delta E_{\text{down}} \rangle = 300 (T/298)^{0.85} \text{ cm}^{-1}$ , and Lennard-Jones collision rate appropriate for N<sub>2</sub>. For HPBF, we have optimized 100 randomly sampled sets of torsional angles to estimate the lowest torsional conformer, and then performed one-dimensional mappings of the 6 hindered rotor modes. The resultant master equation-based predictions for the temperature- and pressure-dependencies of the recombination rate coefficient are shown in Figure 7 of the main text and the results discussed therein.

### 3.4 MVK-oxide + water monomer.

**Ab initio calculations, computational kinetics and mechanistic investigations.** For the reaction of MVK-oxide with water, the present experimental analysis is only able to obtain an upper bound to the rate coefficient. Thus, it is interesting to consider what theory predicts for the actual rate coefficient for this reaction. This reaction has been the subject of previous theoretical studies by Anglada and coworkers (27, 48, 49), Kuwata *et al.* (50) and Vereecken *et al.* (28) (based on the results of Anglada and Solé (27)). The recent study of Anglada and Solé (27) was based on CCSD(T)/aug-cc-pVTZ//B3LYP/6-311++G(2df,2p) energetic analyses, while that of Kuwata *et al.* employed MCG3///QCISD/6-31G\* energies. A recent survey by Vereecken *et al.* (28) suggested that the rates predicted by Anglada and Solé should be reduced by a factor of 7.1 on the basis of comparisons of related calculations for CH<sub>3</sub>CHO + H<sub>2</sub>O. This rate reduction was correlated with an increase in the barrier height by 1.16 kcal mol<sup>-1</sup>, which apparently was needed due to the lack of post-CCSD(T) calculations. Here, we proceed beyond these earlier works with higher level calculations of the energies. We also explore the role of one additional form of H<sub>2</sub>O-catalysis, where the water molecule is simply a spectator molecule that lowers the isomerization barriers relative to isolated MVK-oxide + H<sub>2</sub>O. For example, this spectator catalysis can enhance the rate of the internal H-transfer from MVK-oxide to form a vinyl hydroperoxide-type species. It also catalyzes the transformation from the *cis* to *trans* forms of MVK-oxide. The present *ab initio* evaluations begin with a B2PLYP-D3/cc-pVTZ density functional-based analysis of the rovibrational properties of the stationary points. Our prior kinetic analyses of CI isomerization reactions have indicated good performance for this double-hybrid functional. At these geometries, we determine CCSD(T)/CBS limit energies from CCSD(T)-F12 calculations for the cc-pVTZ-F12 and cc-pVQZ-F12 basis sets. We also evaluate CCSDT(Q)/6-31G\* corrections for high order excitations, core-valence corrections from the CBS limit of CCSD(T) for the cc-pcVTZ and cc-pcVQZ bases, and anharmonicity corrections evaluated with B2PLYP-D3/cc-pVTZ based vibrational perturbation theory. For validation purposes, we also perform a closely related analysis for the reaction of CH<sub>2</sub>OO with H<sub>2</sub>O. An initial study of CH<sub>2</sub>OO + H<sub>2</sub>O provides some validation for the present approach for MVK-oxide + H<sub>2</sub>O. Various components of the stationary point energies for CH<sub>2</sub>OO + H<sub>2</sub>O are provided in Table S8. The 0.1 kcal mol<sup>-1</sup> difference in the T(Q) correction for the 6-31G\* and cc-pVDZ bases provides some indication of the basis set dependence of this correction. For the MVK-oxide + H<sub>2</sub>O reaction our computational resources constrain us to the 6-31G\* basis set. Notably, the differences between the deviations in the B2PLYP-D3 and CCSD(T) calculated ZPEs decrease quite substantially with increasing basis set. Nevertheless, at the complete basis set (CBS) limit the two values likely still differ by about 0.2 kcal mol<sup>-1</sup> for the TS. This difference may simply be a result of the significant multireference effects in CH<sub>2</sub>OO, which can yield different errors in the B2PLYP-D3 and CCSD(T) estimates. It is not clear *a priori* which is correct. Overall, it seems reasonable to expect high accuracy for the present scheme, with overall uncertainties of ~ 0.3 kcal mol<sup>-1</sup> (51).

**Table S8.** Stationary Point Energies (kcal mol<sup>-1</sup>) for CH<sub>2</sub>OO + H<sub>2</sub>O.<sup>a</sup>

| Species                               | CCSD(T)-F12 <sup>b</sup> |            |            | T(Q)<br>Corr. | Core<br>Val. | CBS  | B2TZ | ZPE<br>Harm. | ZPE<br>Anh. | Total <sup>b</sup> |
|---------------------------------------|--------------------------|------------|------------|---------------|--------------|------|------|--------------|-------------|--------------------|
|                                       | DZ-<br>F12               | TZ-<br>F12 | QZ-<br>F12 |               |              |      |      |              |             |                    |
| CH <sub>2</sub> OO + H <sub>2</sub> O | 0.0                      | 0.0        | 0.0        | 0.0           | 0.00         | 0.0  | 0.0  | 0.0          | 0.0         | 0.0                |
| CH <sub>2</sub> OO...H <sub>2</sub> O | -8.34                    | -8.41      | -8.40      | 0.26          | 0.14         | 0.00 | 2.28 | 2.61,2.39    | -0.14       | -6.11<br>(-6.27)   |
| TS; tau a                             | -0.03                    | -0.18      | -0.22      | 0.81          | 0.72         | 0.25 | 2.78 | 3.35,3.14    | -0.39       | 3.12<br>(3.48)     |
| TS; tau b                             | 0.92                     | 0.76       | 0.73       | 0.82          | 0.73         | 0.25 | 2.70 | 3.23,3.06    | -0.43       | 3.97<br>(4.35)     |
| OHCH <sub>2</sub> OOH                 | -<br>47.62               | -47.65     | -47.73     | 1.47          | 1.43         | 0.11 | 5.27 | 5.73,5.60    | -0.13       | -41.09<br>(-40.93) |

<sup>a</sup> All energies are relative to CH<sub>2</sub>OO + H<sub>2</sub>O. Aside from the CCSD(T) ZPE calculations all energies were evaluated at the B2PLYPD3/cc-pVTZ geometries.

<sup>b</sup> The total zero-point corrected energy from CCSD(T)-F12b/CBS + T(Q)/DZ correction + Core Valence correction + anharmonic ZPE(B2PLYPD3/cc-pVTZ). The numbers in parentheses are the W3X-L//QCISD/TZ calculations from Long *et al.* (52).

Long *et al.* (52) also examined the  $\text{CH}_2\text{OO} + \text{H}_2\text{O}$  reaction in detail, finding similar results to the present work, but with  $0.4 \text{ kcal mol}^{-1}$  higher saddle point energies. The higher barriers predicted by Long *et al.* appear to arise primarily from their use of a scaling-based relation to treat the anharmonic ZPE, in contrast with the explicit spectroscopic perturbation theory evaluations performed herein. The method used by Long *et al.* limits the ZPE change from reactants to TS to fairly small numbers due to the cancellation in TS and reactant effects. Additionally, the present analysis also employs a somewhat more direct treatment of the higher order excitations and improved treatment of other aspects such as the geometries and frequencies.

*Ab initio* transition state theory calculations utilizing these energies combined with an Eckart tunneling model and rigid rotor harmonic oscillator state counts (employing the anharmonic fundamental frequencies) yield a predicted room temperature rate coefficient of  $4.4 \times 10^{-16} \text{ cm}^3 \text{ s}^{-1}$  for the  $\text{CH}_2\text{OO} + \text{H}_2\text{O}$  reaction. For comparison, the most recent experimental measurement of  $(3.2 \pm 1.2) \times 10^{-16} \text{ cm}^3 \text{ s}^{-1}$  (53) falls more or less midway between the present prediction and that of Long *et al.* ( $2.4 \times 10^{-16} \text{ cm}^3 \text{ s}^{-1}$ ), with the experimental error bars encompassing both theoretical predictions. Notably, the primary cause for the variation in the theoretical results appears to be the difference in the predicted barrier heights, with a  $0.4 \text{ kcal mol}^{-1}$  room temperature Boltzmann factor essentially identical to the ratio of the two predictions. It is perhaps worth noting that, due to the relatively low tunneling frequency ( $\sim 500 \text{ cm}^{-1}$ ), tunneling has only a modest effect on the rate predictions; simply removing tunneling lowers our rate prediction by only 20%, while reducing the tunneling frequency by 20% only lowers the rate coefficient by 8%. Thus, the physically more meaningful small curvature tunneling treatment of Long *et al.* is unlikely to have much bearing on the discrepancy in the rate predictions.

Prior work has examined four separate types of TSs for the reaction of MVK-oxide +  $\text{H}_2\text{O}$  (27, 48-50). The primary transition state involves OH-insertion across COO. Here, this insertion was studied for both *exo* and *endo* orientations and for all 4 conformers of MVK-oxide. Another key transition state involves direct catalysis of the H-transfer from the  $\text{CH}_3$  group to the terminal O via a bridging  $\text{H}_2\text{O}$ . Although the barriers for this pathway are considerably larger, the imaginary frequency is also much larger, which dramatically increases the tunneling rate (54). In the end, the rates for the two pathways are fairly comparable. A pathway involving OH-insertion across the  $\text{CH}_2\text{CHCOO}$  group has barriers that are of similar magnitude to those for the  $\text{H}_2\text{O}$ -catalyzed H-transfer from  $\text{CH}_3$  to O. Finally, the barriers for an  $\text{H}_2\text{O}$ -catalyzed H transfer from the CH group to the terminal O were found to be too high for this pathway to be relevant. The present calculations of these stationary point energies for the reaction of all four isomers of MVK-oxide with  $\text{H}_2\text{O}$  are reported in Table S9. Then, in Table S10 we report the stationary point energies for a few of the spectator  $\text{H}_2\text{O}$  processes, again for all four isomers. For simplicity, the latter calculations focus on spectator catalysis related to the *trans* to *cis* isomerization process and the CI to vinyl hydroperoxide isomerization in the *syn* conformers. These processes are chosen due to their direct relevance to the present discussion, although others, such as a catalysis of the decomposition of the anti-forms may also be occurring.

A schematic plot of the key reaction pathways for the *syn-trans* conformer is provided in Figure S11. Notably, although the pathway for formation of the  $\text{C}_2\text{H}_3\text{C}(\text{OH})(\text{CH}_3)\text{OOH}$  species has the lowest barriers, the imaginary frequencies for the direct and spectator-catalyzed pathways to the  $\text{C}_2\text{H}_3\text{C}(\text{CH}_2)\text{OOH} + \text{H}_2\text{O}$  products are about twice as large. Thus, it is not clear which pathway will contribute most to the kinetics.

**Table S9.** Stationary point energies (kcal mol<sup>-1</sup>) for MVK-oxide + H<sub>2</sub>O. All energies are relative to the *syn-trans* conformer of MVK-oxide + H<sub>2</sub>O.

| Species                               | Label | CCSD(T)-F12b |        |        | T(Q)<br>Corr. | Core<br>Val. | E0    | Anh.  | Total  |
|---------------------------------------|-------|--------------|--------|--------|---------------|--------------|-------|-------|--------|
|                                       |       | DZ-F12       | TZ-F12 | CBS    | 6-<br>31G*    | CBS          | B2/TZ | B2/TZ |        |
| <i>syn-trans</i>                      | 1a    | 0.0          | 0.0    | 0.0    | 0.0           | 0.0          | 0.0   | 0.0   | 0.0    |
| <i>syn-trans</i> ...H <sub>2</sub> O  | 2a    | -8.82        | -8.89  | -8.92  | 0.39          | -0.01        | 2.09  | -0.07 | -6.52  |
| 2a = 3a                               |       | 7.22         | 7.16   | 7.12   | 0.93          | 0.23         | 1.10  | -0.42 | 8.97   |
| VHPOH; <i>trans</i>                   | 3a    | -32.55       | -32.44 | -32.38 | 1.60          | 0.13         | 3.99  | -0.10 | -26.76 |
| 2a = 3a'                              |       | 8.76         | 8.70   | 8.67   | 0.96          | 0.23         | 1.11  | -0.43 | 10.53  |
| VHPOH; <i>trans</i> '                 | 3a'   | -32.36       | -32.23 | -32.17 | 1.60          | 0.13         | 3.88  | -0.09 | -26.64 |
| 2a = 4a                               |       | 13.08        | 12.86  | 12.75  | 0.82          | -0.01        | -1.64 | 0.24  | 12.16  |
| VHP; <i>trans</i> ...H <sub>2</sub> O | 4a    | -20.76       | -20.61 | -20.54 | 1.31          | -0.09        | 2.26  | -0.09 | -17.21 |
| 2a = 4a'                              |       | 12.85        | 12.63  | 12.51  | 0.83          | -0.01        | -1.60 | 0.21  | 11.94  |
| VHP; <i>trans</i> ...H <sub>2</sub> O | 4a'   | -21.18       | -21.03 | -20.95 | 1.31          | -0.09        | 2.30  | -0.22 | -17.66 |
| <i>syn-cis</i>                        | 1b    | 1.93         | 1.94   | 1.94   | 0.04          | 0.0          | -0.19 | 0.00  | 1.79   |
| <i>syn-cis</i> ...H <sub>2</sub> O    | 2b    | -6.96        | -7.02  | -7.05  | 0.48          | -0.01        | 1.88  | -0.09 | -4.79  |
| 2b = 3b                               |       | 7.44         | 7.39   | 7.37   | 1.00          | 0.23         | 1.21  | -0.64 | 9.17   |
| VHPOH; <i>cis</i>                     | 3b    | -33.24       | -33.15 | -33.11 | 1.64          | 0.11         | 3.99  | -0.10 | -27.40 |
| 2b = 3a'                              |       | 9.04         | 8.99   | 8.97   | 1.00          | 0.23         | 0.97  | -0.45 | 10.72  |
| VHPOH; <i>trans</i> '                 | 3a'   | -32.36       | -32.23 | -32.17 | 1.60          | 0.13         | 3.88  | -0.09 | -26.64 |
| 2b = 4b                               |       | 13.36        | 13.14  | 13.03  | 0.87          | -0.02        | -1.61 | 0.05  | 12.32  |
| VHP; <i>cis</i> ...H <sub>2</sub> O   | 4b    | -22.66       | -22.53 | -22.47 | 1.32          | -0.10        | 2.36  | -0.18 | -19.06 |
| 2b = 4b'                              |       | 13.14        | 12.91  | 12.80  | 0.88          | -0.02        | -1.54 | -0.04 | 12.07  |
| VHP; <i>cis</i> ...H <sub>2</sub> O'  | 4b'   | -23.30       | -23.16 | -23.09 | 1.32          | -0.10        | 2.46  | -0.27 | -19.68 |
| <i>anti-trans</i>                     | 1c    | 2.70         | 2.72   | 2.74   | -0.03         | 0.01         | -0.10 | -0.03 | 2.60   |
| <i>anti-trans</i> ...H <sub>2</sub> O | 2c    | -6.26        | -6.28  | -6.29  | 0.47          | 0.02         | 2.00  | -0.17 | -3.96  |
| 2c = 3c                               |       | 7.97         | 7.92   | 7.89   | 0.93          | 0.23         | 0.96  | -0.51 | 9.50   |
| VHPOH; <i>trans</i>                   | 3c    | -32.21       | -32.10 | -34.76 | 1.62          | 0.12         | 3.98  | -0.07 | -26.38 |
| 2c = 3c'                              |       | 7.43         | 7.35   | 7.32   | 0.90          | 0.22         | 1.04  | -0.66 | 8.81   |
| VHPOH; <i>trans</i> '                 | 3c'   | -34.20       | -34.11 | -34.06 | 1.64          | 0.11         | 3.92  | -0.15 | -28.54 |
| 2c = 5c                               |       | 24.19        | 24.02  | 23.94  |               |              | -2.30 | 0.04  | 21.68  |
| AHP...H <sub>2</sub> O                | 5c    |              |        |        |               |              |       |       | -6.91  |
| 2c = 5c'                              |       | 23.82        | 23.65  | 23.57  |               |              | -2.30 | 0.02  | 21.29  |
| AHP; <i>tau</i> '...H <sub>2</sub> O  | 5c'   |              |        |        |               |              |       |       | -6.61  |
| <i>anti-cis</i>                       | 1d    | 2.84         | 2.79   | 2.78   | 0.21          | 0.05         | 0.03  | -0.01 | 3.06   |
| <i>anti-cis</i> ...H <sub>2</sub> O   | 2d    | -5.06        | -5.15  | -5.19  | 0.56          | 0.05         | 2.00  | -0.30 | -2.88  |
| 2d = 3d                               |       | 9.31         | 9.24   | 9.20   | 1.03          | 0.24         | 1.00  | -0.61 | 10.86  |
| VHPOH; <i>cis</i>                     | 3d    | -32.71       | -32.61 | -32.57 | 1.63          | 0.12         | 3.97  | -0.14 | -26.98 |
| 2d = 3d'                              |       | 9.52         | 9.43   | 9.38   | 1.00          | 0.24         | 0.97  | -0.60 | 11.00  |
| VHPOH; <i>cis</i> '                   | 3d'   | -33.63       | -33.53 | -33.48 | 1.63          | 0.11         | 3.98  | -0.07 | -27.83 |
| 2d = 6d                               |       | 9.53         | 9.32   | 9.22   | 0.71          | 0.21         | 2.17  | -0.57 | 11.74  |
| VHPOH'                                | 6d    | -27.34       | -27.31 | -27.30 | 1.48          | 0.04         | 5.27  | -0.15 | -20.65 |
| 2d = 6d'                              |       | 9.90         | 9.70   | 9.59   | 0.74          | 0.21         | 1.84  | -0.73 | 11.65  |
| VHPOH'; <i>tau</i> '                  | 6d'   | -25.97       | -25.92 | -25.90 | 1.49          | 0.04         | 5.16  | -0.18 | -19.39 |



**Table S10.** Stationary point energies (kcal mol<sup>-1</sup>) describing effect of spectator H<sub>2</sub>O on MVK-oxide transformations. All energies are relative to the *syn-trans* conformer of MVK-oxide + H<sub>2</sub>O.

| Species                                | Label                | CCSD(T)-F12b |        |        | T(Q)   | Core  | E0    | Anh.  | Total  |
|----------------------------------------|----------------------|--------------|--------|--------|--------|-------|-------|-------|--------|
|                                        |                      | DZ-F12       | TZ-F12 | CBS    | 6-31G* | Val.  | B2/TZ | B2/TZ |        |
| <i>syn-trans</i>                       | 1a                   | 0.0          | 0.0    | 0.0    | 0.0    | 0.0   | 0.0   | 0.0   | 0.0    |
| <i>syn-trans</i> ...H <sub>2</sub> O = | stcH <sub>2</sub> O  | -1.60        | -1.58  | -1.56  | 0.72   | -0.00 | 1.47  | -0.22 | 0.41   |
| <i>syn-cis</i> ...H <sub>2</sub> O     |                      |              |        |        |        |       |       |       |        |
| <i>syn-trans</i> ...H <sub>2</sub> O = | stcH <sub>2</sub> O' | -2.07        | -2.05  | -2.04  | 0.73   | 0.00  | 1.55  | -0.40 | -0.17  |
| <i>syn-cis</i> ...H <sub>2</sub> O     |                      |              |        |        |        |       |       |       |        |
| <i>syn-trans</i> ...H <sub>2</sub> O = | stVHPH               | 13.78        | 13.73  | 13.70  | 0.79   | 0.02  | -0.95 | -0.23 | 13.33  |
| VHP...H <sub>2</sub> O;a               |                      |              |        |        |        |       |       |       |        |
| <i>syn-trans</i> ...H <sub>2</sub> O = | stVHPH'              | 12.89        | 12.79  | 12.74  | 0.80   | 0.02  | -0.60 | -0.11 | 12.86  |
| VHP...H <sub>2</sub> O;a;gb            |                      |              |        |        |        |       |       |       |        |
| VHP...H <sub>2</sub> O;a               | VHPHt                | -16.95       | -16.73 | -16.62 | 1.30   | -0.09 | 1.32  | -0.14 | -14.22 |
| VHP...H <sub>2</sub> O;a;gb            | VHPHt'               | -16.92       | -16.74 | -16.65 | 1.33   | -0.08 | 1.50  | -0.30 | -14.19 |
| <i>syn-cis</i>                         | 1b                   | 1.93         | 1.94   | 1.94   | 0.04   | 0.0   | -0.19 | 0.0   | 1.79   |
| <i>syn-cis</i> ...H <sub>2</sub> O =   | scVHPH               | 14.69        | 14.62  | 14.58  | 0.85   | 0.03  | -0.82 | -0.09 | 14.55  |
| VHP...H <sub>2</sub> O;b               |                      |              |        |        |        |       |       |       |        |
| <i>syn-cis</i> ...H <sub>2</sub> O =   | scVHPH'              | 14.10        | 13.99  | 13.93  | 0.83   | 0.01  | -0.63 | -0.24 | 13.89  |
| VHP...H <sub>2</sub> O;b;gb            |                      |              |        |        |        |       |       |       |        |
| VHP...H <sub>2</sub> O;b               | VHPHc                | -18.99       | -18.77 | -18.67 | 1.33   | -0.09 | 1.39  | -0.10 | -16.15 |
| VHP...H <sub>2</sub> O;b;gb            | VHPHc'               | -18.93       | -18.78 | -18.70 | 1.34   | -0.09 | 1.63  | -0.25 | -16.07 |
| <i>anti-trans</i>                      | 1c                   | 2.70         | 2.72   | 2.74   | -0.03  | 0.01  | -0.10 | -0.03 | 2.60   |
| <i>anti-trans</i> ...H <sub>2</sub> O  | atcH <sub>2</sub> O  | 0.87         | 0.88   | 0.89   | 0.72   | 0.01  | 1.52  | -0.18 | 2.97   |
| = <i>anti-cis</i> ...H <sub>2</sub> O  |                      |              |        |        |        |       |       |       |        |
| <i>anti-trans</i> ...H <sub>2</sub> O  | atcH <sub>2</sub> O' | 1.25         | 1.29   | 1.30   | 0.72   | 0.01  | 1.34  | -0.19 | 3.19   |
| = <i>anti-cis</i> ...H <sub>2</sub> O  |                      |              |        |        |        |       |       |       |        |

Predicted rate coefficients for the reaction of water with each of the conformer of MVK-oxide were obtained from AITSTME calculations implementing the energies in Table S9 and S10 together with an Eckart tunneling model, rigid rotor harmonic oscillator state counts employing the anharmonic fundamental frequencies, and one-dimensional torsional treatments for the methyl rotors. The predictions are not sensitive to the energy transfer parameters for the relevant region of temperature and pressure. They are also not sensitive to the rate for forming the van der Waals complexes. Thus, these parameters are not described here. Suffice it to say, that we use physically realistic values. The rate coefficients are obtained from two separate master equations: one treating the *syn-trans*- and *syn-cis*- conformers, and one treating the *anti-trans*- and *anti-cis*- conformers. For simplicity, we ignore the coupling of the *syn*- and *anti*- conformers, which we do not expect to be significant. The most significant shortcoming in this analysis is in the use of the Eckart model to predict the tunneling rates. This shortcoming may affect our predictions of which pathway is of greatest significance kinetically.

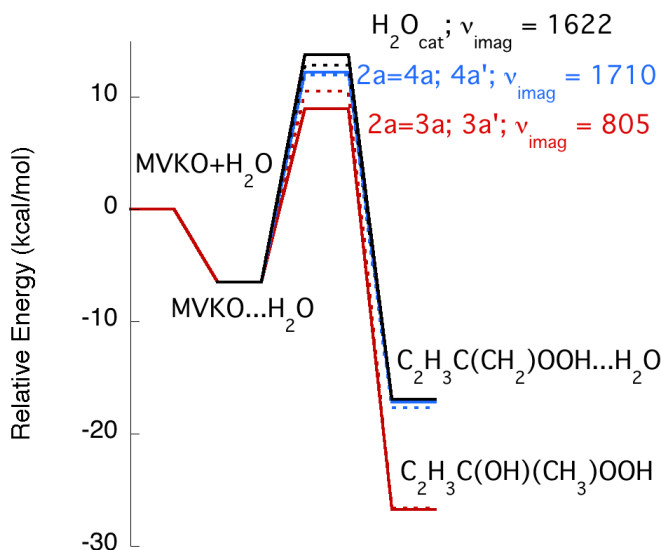

**Fig. S11.** Schematic plot of the reaction pathways for the reaction of H<sub>2</sub>O with *syn-trans*-MVK-oxide (denoted MVKO here).

The AITSTME-predicted rate coefficients for the chemically significant reactions are summarized in Table S11. For simplicity, we do not report the rate coefficients for formation of the van der Waals wells, which are chemically irrelevant since the branching from those wells onto chemical products does not contribute significantly to the overall flux to chemical products. Similarly, we do not report the rate coefficients for isomerization between *cis* and *trans* conformers, since that process has already been calculated to happen rapidly enough to yield thermal distributions of the *cis* and *trans* conformers, as discussed in section 2 of the SI.

**Table S11.** Conformer-specific AITSTME predicted rate coefficients (cm<sup>3</sup> s<sup>-1</sup>) for the MVK-oxide + H<sub>2</sub>O reaction.

| Reactants\Products <sup>a</sup> | W2                    | P2                    | P3                    | W3                    | Total                 |
|---------------------------------|-----------------------|-----------------------|-----------------------|-----------------------|-----------------------|
| <i>Syn-trans</i>                | $1.4 \times 10^{-20}$ | $9.3 \times 10^{-21}$ | $7.9 \times 10^{-20}$ | -                     | $1.0 \times 10^{-19}$ |
| <i>Syn-cis</i>                  | $1.2 \times 10^{-19}$ | $8.4 \times 10^{-20}$ | $4.2 \times 10^{-20}$ | -                     | $2.5 \times 10^{-19}$ |
| <i>Syn(thermal)</i>             | $2.3 \times 10^{-20}$ | $1.5 \times 10^{-20}$ | $7.6 \times 10^{-20}$ | -                     | $1.1 \times 10^{-19}$ |
| <i>Anti-trans</i>               | $1.1 \times 10^{-18}$ | -                     | -                     | $<1 \times 10^{-23}$  | $1.1 \times 10^{-18}$ |
| <i>Anti-cis</i>                 | $2 \times 10^{-19}$   | -                     | -                     | $1.3 \times 10^{-20}$ | $2 \times 10^{-19}$   |
| <i>Anti(thermal)</i>            | $8 \times 10^{-19}$   | -                     | -                     | $4.2 \times 10^{-21}$ | $8 \times 10^{-19}$   |

<sup>a</sup> W2 denotes C<sub>2</sub>H<sub>3</sub>C(OH)(CH<sub>3</sub>)OOH; P2 denotes C<sub>2</sub>H<sub>3</sub>C(CH<sub>2</sub>)OOH...H<sub>2</sub>O via direct H<sub>2</sub>O catalysis; P3 denotes C<sub>2</sub>H<sub>3</sub>C(CH<sub>2</sub>)OOH...H<sub>2</sub>O via spectator H<sub>2</sub>O catalysis; W3 denotes C<sub>2</sub>H<sub>3</sub>C(OH)(CH<sub>3</sub>)OOH via the pathway leading to the 6d isomers in Table S10.

The total rate coefficient for the reaction of the thermal distribution of *syn*- conformers, *syn(thermal)*, is predicted to be  $1.1 \times 10^{-19}$  cm<sup>3</sup> s<sup>-1</sup>, while that for the thermal distribution of *anti*- isomers, *anti(thermal)*, is predicted to be  $8 \times 10^{-19}$  cm<sup>3</sup> s<sup>-1</sup>. Interestingly, for the *syn(thermal)* case, the spectator catalysis pathway has the largest contribution to the rate coefficient, but all pathways make a significant contribution. The rate coefficient determined in the present work is in accord with the previous work by Anglada and Solé ( $3.4 \times 10^{-19}$  cm<sup>3</sup> s<sup>-1</sup>) (27), and the adjusted value of Anglada and Solé by Vereecken *et al.* ( $9.5 \times 10^{-20}$  cm<sup>3</sup> s<sup>-1</sup>) (28), but the value obtained herein was achieved without empirical adjustment of the barrier height or other parameters.

#### 4. Global chemical modelling evaluation of particulate formation from MVK-oxide + SO<sub>2</sub>

The implications for the reaction of MVK-oxide with SO<sub>2</sub> on particle nucleation have been modelled with nucleation coefficients of 2 (55) and 1.5 (56) for H<sub>2</sub>SO<sub>4</sub>, and the results presented in Figures S12 and S13, respectively.

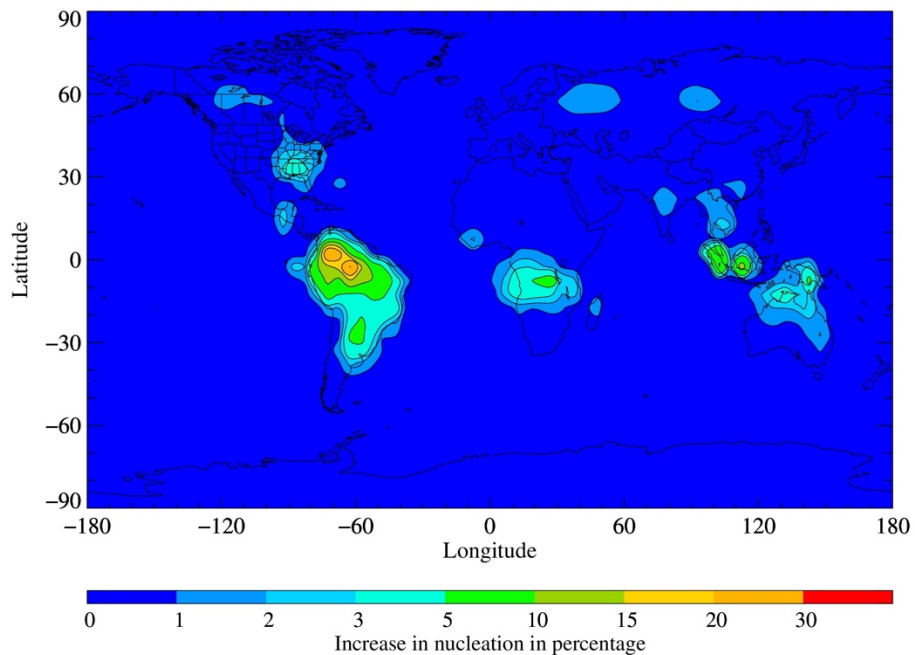

**Fig. S12.** The impact of the MVK-oxide reaction with SO<sub>2</sub> on particulate nucleation, using a nucleation coefficient for sulfuric acid of 2.

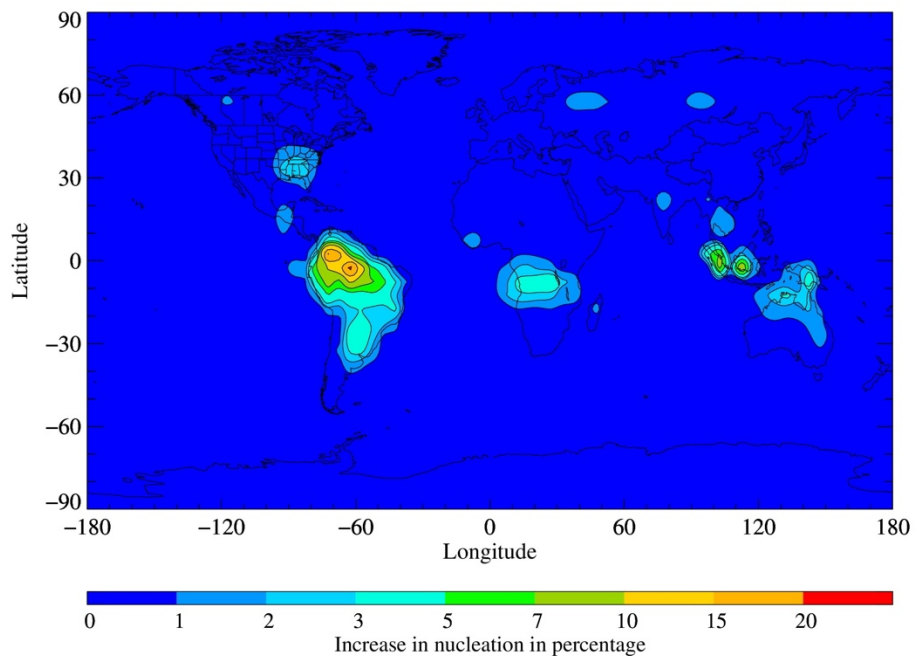

**Fig. S13.** The impact of the MVK-oxide reaction with SO<sub>2</sub> on particulate nucleation, using a nucleation coefficient for sulfuric acid of 1.5

## 5. Ab initio optimized geometries and frequencies

### 5.1 MVK-oxide.

#### **Syn-trans**

Relative energy = 0.0 kcal mol<sup>-1</sup>

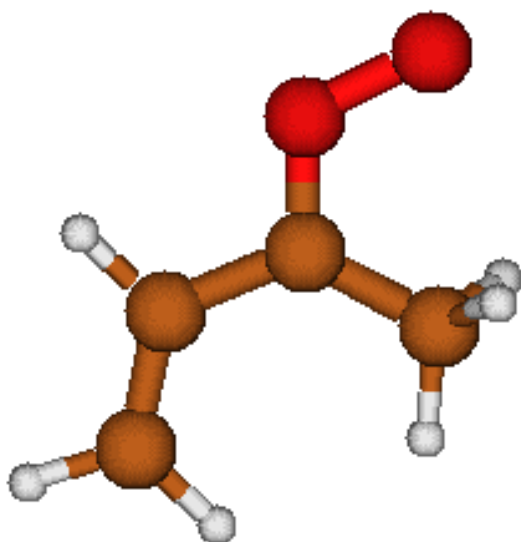

|                |           |   |           |           |           |
|----------------|-----------|---|-----------|-----------|-----------|
| 1              | 6         | 0 | -0.281002 | -2.428825 | 0.000000  |
| 2              | 6         | 0 | 0.489860  | -1.332579 | 0.000000  |
| 3              | 6         | 0 | 0.000000  | 0.017627  | 0.000000  |
| 4              | 6         | 0 | -1.397431 | 0.477385  | 0.000000  |
| 5              | 8         | 0 | 0.934365  | 0.910720  | 0.000000  |
| 6              | 8         | 0 | 0.561182  | 2.203583  | 0.000000  |
| 7              | 1         | 0 | -1.359012 | -2.376515 | 0.000000  |
| 8              | 1         | 0 | 0.163693  | -3.411629 | 0.000000  |
| 9              | 1         | 0 | 1.567972  | -1.424436 | 0.000000  |
| 10             | 1         | 0 | -2.098829 | -0.348501 | 0.000000  |
| 11             | 1         | 0 | -1.553379 | 1.122502  | 0.866535  |
| 12             | 1         | 0 | -1.553379 | 1.122502  | -0.866535 |
| Frequencies -- | 119.9147  |   | 198.1647  |           | 256.1167  |
| Frequencies -- | 283.2193  |   | 331.6966  |           | 459.4209  |
| Frequencies -- | 496.8539  |   | 609.8350  |           | 682.4911  |
| Frequencies -- | 814.7146  |   | 950.8478  |           | 998.3597  |
| Frequencies -- | 1026.7698 |   | 1041.7510 |           | 1047.8678 |
| Frequencies -- | 1076.4570 |   | 1292.3767 |           | 1337.6406 |
| Frequencies -- | 1400.1620 |   | 1449.9665 |           | 1453.0141 |
| Frequencies -- | 1472.8403 |   | 1504.9644 |           | 1662.0030 |
| Frequencies -- | 3052.6351 |   | 3097.5438 |           | 3178.5451 |
| Frequencies -- | 3186.9118 |   | 3194.4379 |           | 3270.2727 |

**Syn-cis**

Relative energy = 3.05 kcal mol<sup>-1</sup>

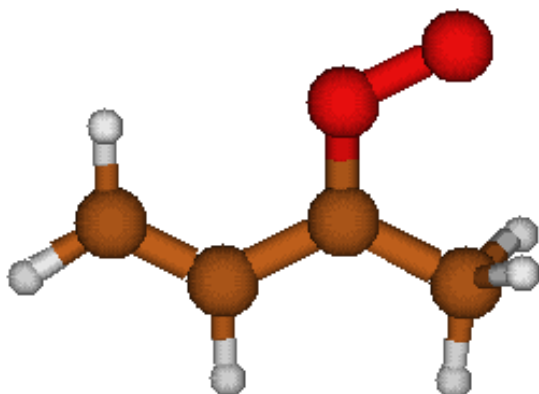

|                |           |   |           |           |           |
|----------------|-----------|---|-----------|-----------|-----------|
| 1              | 6         | 0 | -2.181296 | -0.839531 | 0.000000  |
| 2              | 6         | 0 | -1.445765 | 0.279851  | 0.000000  |
| 3              | 6         | 0 | 0.000000  | 0.334288  | 0.000000  |
| 4              | 6         | 0 | 0.795556  | 1.572979  | 0.000000  |
| 5              | 8         | 0 | 0.625731  | -0.789133 | 0.000000  |
| 6              | 8         | 0 | 1.976736  | -0.749625 | 0.000000  |
| 7              | 1         | 0 | -1.722960 | -1.817168 | 0.000000  |
| 8              | 1         | 0 | -3.258737 | -0.787750 | 0.000000  |
| 9              | 1         | 0 | -1.934488 | 1.244081  | 0.000000  |
| 10             | 1         | 0 | 0.161642  | 2.453346  | 0.000000  |
| 11             | 1         | 0 | 1.461921  | 1.566019  | 0.865256  |
| 12             | 1         | 0 | 1.461921  | 1.566019  | -0.865256 |
| Frequencies -- | 66.4658   |   | 206.2188  |           | 228.8220  |
| Frequencies -- | 275.2111  |   | 327.6923  |           | 442.9534  |
| Frequencies -- | 485.9721  |   | 623.2547  |           | 665.9256  |
| Frequencies -- | 815.8805  |   | 971.1810  |           | 992.1262  |
| Frequencies -- | 1024.2898 |   | 1041.0284 |           | 1044.4521 |
| Frequencies -- | 1108.3087 |   | 1286.3487 |           | 1340.7090 |
| Frequencies -- | 1397.3938 |   | 1418.9712 |           | 1451.4392 |
| Frequencies -- | 1475.0005 |   | 1500.5024 |           | 1669.4449 |
| Frequencies -- | 3044.5296 |   | 3088.3513 |           | 3171.9026 |
| Frequencies -- | 3177.8055 |   | 3200.0465 |           | 3272.9201 |

**Syn-trans=syn-cis**

Relative energy = 7.97 kcal mol<sup>-1</sup>

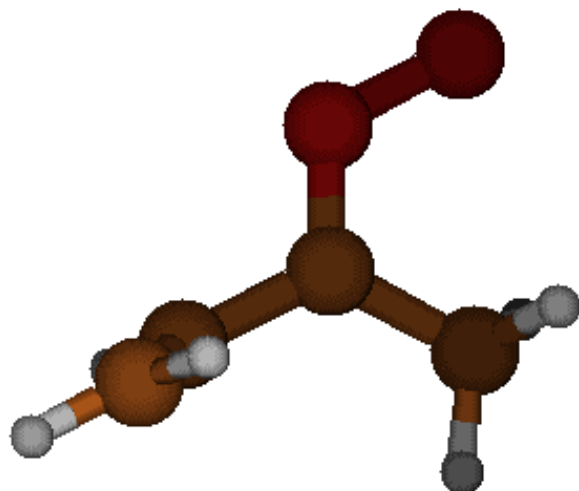

|                |           |   |           |           |           |
|----------------|-----------|---|-----------|-----------|-----------|
| 1              | 6         | 0 | 2.327858  | -0.267919 | 0.425627  |
| 2              | 6         | 0 | 1.381300  | -0.133215 | -0.497496 |
| 3              | 6         | 0 | -0.027092 | 0.153355  | -0.167281 |
| 4              | 6         | 0 | -0.602629 | 1.490867  | 0.045170  |
| 5              | 8         | 0 | -0.796694 | -0.864200 | -0.093452 |
| 6              | 8         | 0 | -2.103652 | -0.635657 | 0.189406  |
| 7              | 1         | 0 | 2.105556  | -0.189953 | 1.480296  |
| 8              | 1         | 0 | 3.351766  | -0.466552 | 0.146356  |
| 9              | 1         | 0 | 1.626162  | -0.217122 | -1.550508 |
| 10             | 1         | 0 | -1.070284 | 1.516480  | 1.033036  |
| 11             | 1         | 0 | -1.432790 | 1.629417  | -0.652467 |
| 12             | 1         | 0 | 0.145734  | 2.268058  | -0.060451 |
| Frequencies -- | -155.8236 |   | 160.3454  |           | 206.9403  |
| Frequencies -- | 272.9053  |   | 318.6863  |           | 393.4493  |
| Frequencies -- | 519.1815  |   | 618.1650  |           | 677.8188  |
| Frequencies -- | 801.6223  |   | 973.9469  |           | 989.5462  |
| Frequencies -- | 996.7350  |   | 1008.2812 |           | 1048.2105 |
| Frequencies -- | 1090.0645 |   | 1299.6607 |           | 1324.2466 |
| Frequencies -- | 1397.9023 |   | 1440.7421 |           | 1448.6849 |
| Frequencies -- | 1456.7181 |   | 1494.5998 |           | 1693.0250 |
| Frequencies -- | 3035.8504 |   | 3076.2762 |           | 3155.4400 |
| Frequencies -- | 3168.9422 |   | 3179.8447 |           | 3258.5054 |

**Anti-trans**

Relative energy = 2.57 kcal mol<sup>-1</sup>

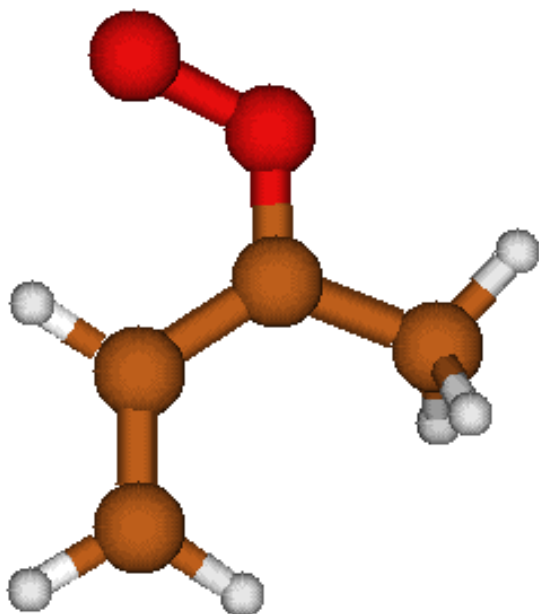

|                |           |   |           |           |           |
|----------------|-----------|---|-----------|-----------|-----------|
| 1              | 6         | 0 | -1.894146 | -1.185090 | 0.000000  |
| 2              | 6         | 0 | -0.571837 | -0.965527 | 0.000000  |
| 3              | 6         | 0 | 0.000000  | 0.349961  | 0.000000  |
| 4              | 6         | 0 | -0.769734 | 1.622704  | 0.000000  |
| 5              | 8         | 0 | 1.282506  | 0.506388  | 0.000000  |
| 6              | 8         | 0 | 2.101575  | -0.560185 | 0.000000  |
| 7              | 1         | 0 | -2.612894 | -0.378124 | 0.000000  |
| 8              | 1         | 0 | -2.286939 | -2.190359 | 0.000000  |
| 9              | 1         | 0 | 0.144815  | -1.772424 | 0.000000  |
| 10             | 1         | 0 | -0.083752 | 2.464487  | 0.000000  |
| 11             | 1         | 0 | -1.409789 | 1.687253  | 0.880050  |
| 12             | 1         | 0 | -1.409789 | 1.687253  | -0.880050 |
| Frequencies -- | 113.8309  |   | 150.9705  |           | 244.3138  |
| Frequencies -- | 280.5671  |   | 326.0586  |           | 377.0466  |
| Frequencies -- | 479.0748  |   | 640.2948  |           | 718.3130  |
| Frequencies -- | 798.5875  |   | 977.2758  |           | 985.0386  |
| Frequencies -- | 1021.2924 |   | 1049.6643 |           | 1057.6112 |
| Frequencies -- | 1065.0237 |   | 1281.3674 |           | 1373.2418 |
| Frequencies -- | 1391.3621 |   | 1436.2627 |           | 1469.0936 |
| Frequencies -- | 1486.0836 |   | 1512.5356 |           | 1657.6094 |
| Frequencies -- | 3054.8184 |   | 3111.1078 |           | 3162.1730 |
| Frequencies -- | 3170.5660 |   | 3228.1091 |           | 3261.6980 |

**Anti-cis**

Relative energy = 3.05 kcal mol<sup>-1</sup>

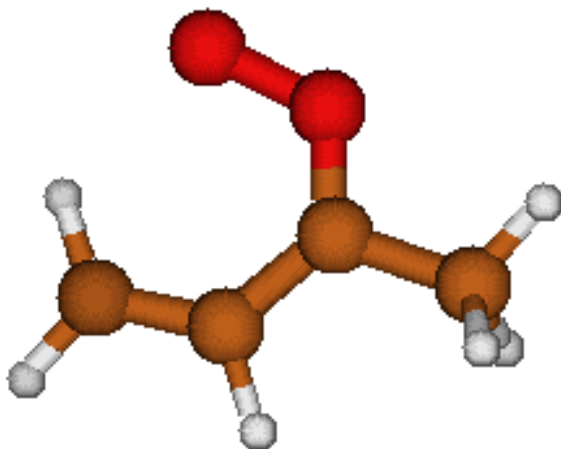

|                |           |   |           |           |           |
|----------------|-----------|---|-----------|-----------|-----------|
| 1              | 6         | 0 | -1.352990 | -1.521124 | 0.000000  |
| 2              | 6         | 0 | -1.214381 | -0.180848 | 0.000000  |
| 3              | 6         | 0 | 0.000000  | 0.576665  | 0.000000  |
| 4              | 6         | 0 | -0.021963 | 2.069054  | 0.000000  |
| 5              | 8         | 0 | 1.191358  | 0.084982  | 0.000000  |
| 6              | 8         | 0 | 1.382201  | -1.251687 | 0.000000  |
| 7              | 1         | 0 | -0.494812 | -2.166647 | 0.000000  |
| 8              | 1         | 0 | -2.348757 | -1.942692 | 0.000000  |
| 9              | 1         | 0 | -2.104292 | 0.435798  | 0.000000  |
| 10             | 1         | 0 | 0.990778  | 2.459965  | 0.000000  |
| 11             | 1         | 0 | -0.547687 | 2.442365  | 0.879064  |
| 12             | 1         | 0 | -0.547687 | 2.442365  | -0.879064 |
| Frequencies -- | 116.7361  |   | 165.5085  |           | 285.0024  |
| Frequencies -- | 305.2060  |   | 339.0183  |           | 368.0726  |
| Frequencies -- | 411.2073  |   | 640.2272  |           | 717.5908  |
| Frequencies -- | 823.6757  |   | 990.3387  |           | 1004.8285 |
| Frequencies -- | 1029.1718 |   | 1053.3593 |           | 1054.9509 |
| Frequencies -- | 1099.6379 |   | 1269.7395 |           | 1340.3444 |
| Frequencies -- | 1418.9240 |   | 1438.3092 |           | 1463.9237 |
| Frequencies -- | 1487.0283 |   | 1508.1717 |           | 1640.9833 |
| Frequencies -- | 3054.6683 |   | 3110.9627 |           | 3165.1107 |
| Frequencies -- | 3167.2660 |   | 3181.8932 |           | 3314.1293 |



**Anti-trans=anti-cis**

Relative energy = 11.25 kcal mol<sup>-1</sup>

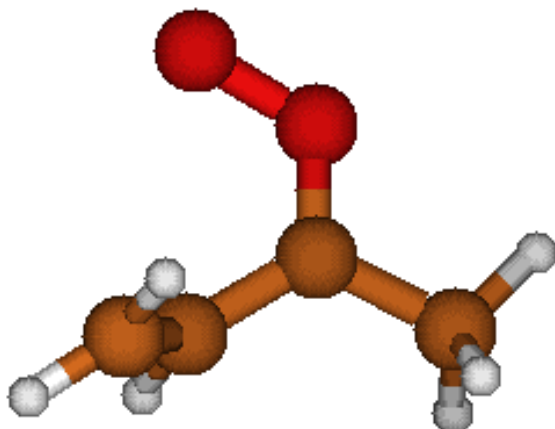

|                |           |   |           |           |           |
|----------------|-----------|---|-----------|-----------|-----------|
| 1              | 6         | 0 | 2.007829  | -0.418699 | -0.342971 |
| 2              | 6         | 0 | 0.984974  | -0.461235 | 0.502459  |
| 3              | 6         | 0 | -0.412755 | -0.301218 | 0.080860  |
| 4              | 6         | 0 | -1.331026 | -1.454707 | -0.099639 |
| 5              | 8         | 0 | -0.925829 | 0.850993  | -0.119854 |
| 6              | 8         | 0 | -0.181649 | 1.963910  | 0.046691  |
| 7              | 1         | 0 | 1.863784  | -0.218324 | -1.394427 |
| 8              | 1         | 0 | 3.019565  | -0.567451 | 0.002037  |
| 9              | 1         | 0 | 1.146198  | -0.648731 | 1.558247  |
| 10             | 1         | 0 | -2.328717 | -1.110049 | -0.356799 |
| 11             | 1         | 0 | -1.377214 | -2.045749 | 0.816530  |
| 12             | 1         | 0 | -0.957925 | -2.113760 | -0.884538 |
| Frequencies -- | -172.4811 |   | 152.1270  |           | 208.0108  |
| Frequencies -- | 231.6809  |   | 294.2586  |           | 330.2831  |
| Frequencies -- | 521.8294  |   | 599.3025  |           | 696.2792  |
| Frequencies -- | 802.6304  |   | 974.6524  |           | 982.0157  |
| Frequencies -- | 993.4085  |   | 1013.3162 |           | 1031.6387 |
| Frequencies -- | 1096.0715 |   | 1286.3799 |           | 1328.8923 |
| Frequencies -- | 1414.9866 |   | 1434.1413 |           | 1473.1757 |
| Frequencies -- | 1478.4513 |   | 1514.3980 |           | 1695.7927 |
| Frequencies -- | 3046.9529 |   | 3100.6707 |           | 3156.9139 |
| Frequencies -- | 3158.0516 |   | 3173.6061 |           | 3263.0241 |

## 5.2 MVK-oxide + H<sub>2</sub>O.

All energies are relative to the *syn-trans* conformer of MVK-oxide + H<sub>2</sub>O.

*syn,trans*...H<sub>2</sub>O

Relative energy = -6.52 kcal mol<sup>-1</sup>

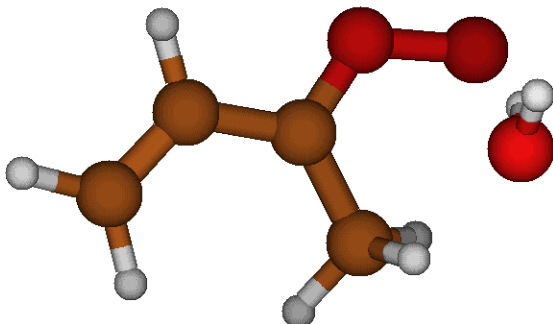

|                |           |   |           |           |           |
|----------------|-----------|---|-----------|-----------|-----------|
| 1              | 6         | 0 | 0.489007  | 0.264516  | 0.167706  |
| 2              | 8         | 0 | -0.336591 | 1.153141  | -0.251510 |
| 3              | 8         | 0 | -1.577619 | 1.195747  | 0.327256  |
| 4              | 8         | 0 | -2.306706 | -1.265045 | -0.649351 |
| 5              | 1         | 0 | -2.721363 | -1.216477 | -1.512131 |
| 6              | 1         | 0 | -2.264989 | -0.342001 | -0.331686 |
| 7              | 6         | 0 | 1.751470  | 0.296037  | -0.529991 |
| 8              | 6         | 0 | 2.762595  | -0.549002 | -0.298507 |
| 9              | 1         | 0 | 1.836135  | 1.061648  | -1.289087 |
| 10             | 1         | 0 | 2.703200  | -1.329584 | 0.444164  |
| 11             | 1         | 0 | 3.678923  | -0.475719 | -0.863409 |
| 12             | 6         | 0 | 0.100681  | -0.642904 | 1.258049  |
| 13             | 1         | 0 | -0.415836 | -0.058942 | 2.019359  |
| 14             | 1         | 0 | 0.957059  | -1.164312 | 1.669279  |
| 15             | 1         | 0 | -0.628323 | -1.357237 | 0.868810  |
| Frequencies -- | 44.9318   |   | 93.9248   |           | 113.8528  |
| Frequencies -- | 148.0790  |   | 209.4653  |           | 225.2281  |
| Frequencies -- | 259.7891  |   | 310.6386  |           | 351.0015  |
| Frequencies -- | 410.5464  |   | 464.0009  |           | 493.3084  |
| Frequencies -- | 601.9423  |   | 690.2681  |           | 758.4837  |
| Frequencies -- | 815.3560  |   | 958.3834  |           | 978.0073  |
| Frequencies -- | 1015.8055 |   | 1030.3811 |           | 1055.7593 |
| Frequencies -- | 1072.2687 |   | 1304.8934 |           | 1342.0402 |
| Frequencies -- | 1401.5251 |   | 1450.9373 |           | 1471.2367 |
| Frequencies -- | 1490.9252 |   | 1510.5859 |           | 1665.5925 |
| Frequencies -- | 1671.7086 |   | 3050.9581 |           | 3111.8539 |
| Frequencies -- | 3179.8565 |   | 3186.4210 |           | 3200.7510 |
| Frequencies -- | 3272.6727 |   | 3517.4754 |           | 3899.8520 |

***syn,cis...H<sub>2</sub>O***

Relative energy = -4.79 kcal mol<sup>-1</sup>

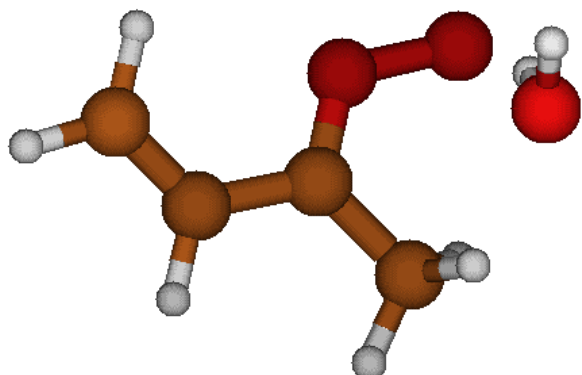

|                |           |   |           |           |           |
|----------------|-----------|---|-----------|-----------|-----------|
| 1              | 6         | 0 | 0.482794  | 0.413398  | -0.218287 |
| 2              | 8         | 0 | 0.044784  | -0.676190 | -0.719244 |
| 3              | 8         | 0 | -1.240344 | -0.677599 | -1.215796 |
| 4              | 8         | 0 | -2.354573 | -0.265627 | 1.250537  |
| 5              | 1         | 0 | -2.586255 | -1.076662 | 1.705565  |
| 6              | 1         | 0 | -2.140465 | -0.534429 | 0.334956  |
| 7              | 6         | 0 | 1.823278  | 0.368578  | 0.340056  |
| 8              | 6         | 0 | 2.541485  | -0.747768 | 0.503219  |
| 9              | 1         | 0 | 2.223477  | 1.324114  | 0.646605  |
| 10             | 1         | 0 | 2.152041  | -1.714733 | 0.221869  |
| 11             | 1         | 0 | 3.533280  | -0.706893 | 0.925958  |
| 12             | 6         | 0 | -0.352026 | 1.624801  | -0.233754 |
| 13             | 1         | 0 | -0.834194 | 1.706409  | -1.207879 |
| 14             | 1         | 0 | 0.236074  | 2.504747  | 0.005606  |
| 15             | 1         | 0 | -1.156078 | 1.498725  | 0.495949  |
| Frequencies -- | 32.9371   |   | 76.5633   |           | 94.9279   |
| Frequencies -- | 132.2298  |   | 197.4039  |           | 226.9238  |
| Frequencies -- | 238.2559  |   | 309.3540  |           | 341.8078  |
| Frequencies -- | 415.7916  |   | 448.5863  |           | 489.0176  |
| Frequencies -- | 611.1751  |   | 670.6446  |           | 768.7060  |
| Frequencies -- | 816.5299  |   | 943.1330  |           | 996.1371  |
| Frequencies -- | 1023.4833 |   | 1034.5872 |           | 1052.8533 |
| Frequencies -- | 1104.9161 |   | 1283.8398 |           | 1342.4179 |
| Frequencies -- | 1401.5507 |   | 1444.1634 |           | 1454.9261 |
| Frequencies -- | 1496.2033 |   | 1508.2471 |           | 1666.4515 |
| Frequencies -- | 1677.4319 |   | 3043.2697 |           | 3104.8767 |
| Frequencies -- | 3171.1756 |   | 3178.4725 |           | 3208.2614 |
| Frequencies -- | 3274.0038 |   | 3499.0217 |           | 3900.5198 |

*syn,trans...H<sub>2</sub>O=syn,cis...H<sub>2</sub>O*

Geometry a

Relative energy = 0.41 kcal mol<sup>-1</sup>

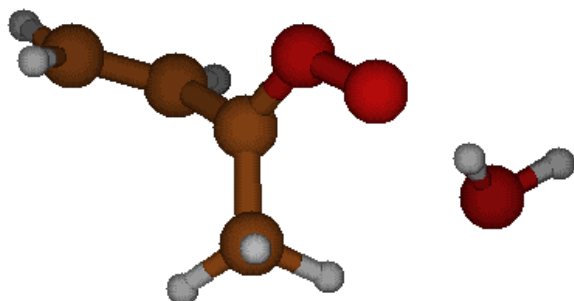

|                |           |   |           |           |           |
|----------------|-----------|---|-----------|-----------|-----------|
| 1              | 6         | 0 | -2.880802 | -0.049482 | -0.250076 |
| 2              | 6         | 0 | -1.657458 | -0.463922 | -0.559184 |
| 3              | 6         | 0 | -0.447285 | -0.007237 | 0.151529  |
| 4              | 6         | 0 | 0.079441  | -0.630814 | 1.374894  |
| 5              | 8         | 0 | 0.149436  | 0.972956  | -0.390681 |
| 6              | 8         | 0 | 1.333044  | 1.393574  | 0.189844  |
| 7              | 1         | 0 | -3.054975 | 0.665315  | 0.541436  |
| 8              | 1         | 0 | -3.741856 | -0.413030 | -0.790043 |
| 9              | 1         | 0 | -1.491233 | -1.180144 | -1.355249 |
| 10             | 1         | 0 | 0.434330  | 0.156667  | 2.040266  |
| 11             | 1         | 0 | 0.961090  | -1.219379 | 1.104128  |
| 12             | 1         | 0 | -0.668603 | -1.265176 | 1.837324  |
| 13             | 1         | 0 | 2.296332  | -0.038523 | -0.323660 |
| 14             | 8         | 0 | 2.473161  | -0.973300 | -0.554529 |
| 15             | 1         | 0 | 3.056417  | -0.942845 | -1.314258 |
| Frequencies -- | -144.9212 |   | 46.0741   |           | 103.9866  |
| Frequencies -- | 128.5973  |   | 171.3865  |           | 211.5284  |
| Frequencies -- | 253.0168  |   | 275.8132  |           | 337.9782  |
| Frequencies -- | 387.2042  |   | 442.1334  |           | 525.8062  |
| Frequencies -- | 620.9468  |   | 669.0667  |           | 774.3546  |
| Frequencies -- | 803.3119  |   | 921.7968  |           | 988.7619  |
| Frequencies -- | 995.4181  |   | 1009.7640 |           | 1040.3556 |
| Frequencies -- | 1096.3749 |   | 1296.7309 |           | 1319.6798 |
| Frequencies -- | 1392.2818 |   | 1447.3971 |           | 1467.5752 |
| Frequencies -- | 1486.7451 |   | 1512.9638 |           | 1671.3128 |
| Frequencies -- | 1696.1287 |   | 3037.5917 |           | 3100.0800 |
| Frequencies -- | 3165.3029 |   | 3173.6130 |           | 3179.4224 |
| Frequencies -- | 3260.9581 |   | 3483.9766 |           | 3901.7777 |

Geometry b

Relative energy = -0.17 kcal mol<sup>-1</sup>

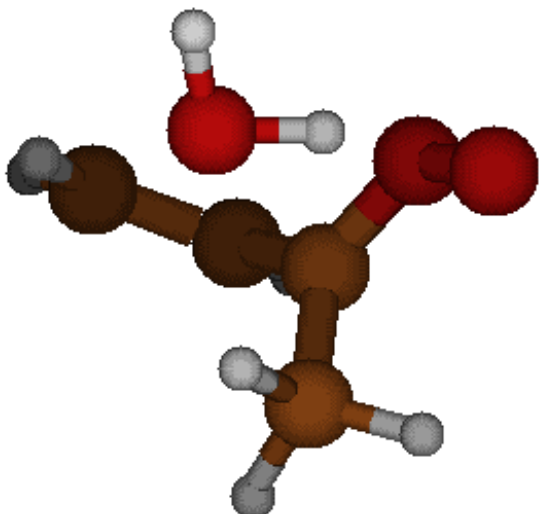

|                |           |   |           |           |           |
|----------------|-----------|---|-----------|-----------|-----------|
| 1              | 6         | 0 | -2.279697 | 0.982306  | -0.266373 |
| 2              | 6         | 0 | -1.838890 | -0.269776 | -0.204644 |
| 3              | 6         | 0 | -0.432410 | -0.564433 | 0.130695  |
| 4              | 6         | 0 | 0.098045  | -0.593244 | 1.502423  |
| 5              | 8         | 0 | 0.320806  | -0.783591 | -0.865900 |
| 6              | 8         | 0 | 1.669941  | -0.963834 | -0.607926 |
| 7              | 1         | 0 | -1.614501 | 1.816222  | -0.091944 |
| 8              | 1         | 0 | -3.310818 | 1.197532  | -0.502666 |
| 9              | 1         | 0 | -2.493472 | -1.113315 | -0.386002 |
| 10             | 1         | 0 | 0.653299  | 0.334399  | 1.669393  |
| 11             | 1         | 0 | 0.823017  | -1.403018 | 1.581226  |
| 12             | 1         | 0 | -0.707523 | -0.676043 | 2.224105  |
| 13             | 1         | 0 | 1.919619  | 0.786143  | -0.201781 |
| 14             | 8         | 0 | 1.681904  | 1.677294  | 0.128239  |
| 15             | 1         | 0 | 2.066888  | 2.290007  | -0.500239 |
| Frequencies -- | -146.2612 |   | 52.1943   |           | 112.8834  |
| Frequencies -- | 142.5367  |   | 178.9859  |           | 209.4953  |
| Frequencies -- | 248.4925  |   | 277.1258  |           | 337.6150  |
| Frequencies -- | 391.8617  |   | 439.5577  |           | 542.9273  |
| Frequencies -- | 606.7060  |   | 668.0224  |           | 782.7031  |
| Frequencies -- | 806.2161  |   | 918.8306  |           | 987.8445  |
| Frequencies -- | 1000.1376 |   | 1005.9314 |           | 1047.9252 |
| Frequencies -- | 1101.3053 |   | 1293.0978 |           | 1325.9385 |
| Frequencies -- | 1392.4906 |   | 1448.9594 |           | 1463.0891 |
| Frequencies -- | 1487.0840 |   | 1515.9956 |           | 1675.3110 |
| Frequencies -- | 1688.1794 |   | 3040.1213 |           | 3104.6560 |
| Frequencies -- | 3165.0939 |   | 3176.6070 |           | 3176.9574 |
| Frequencies -- | 3262.2919 |   | 3474.5887 |           | 3899.8450 |

***syn-trans...H<sub>2</sub>O = VHPOH***

Geometry a

Relative energy = 8.97 kcal mol<sup>-1</sup>

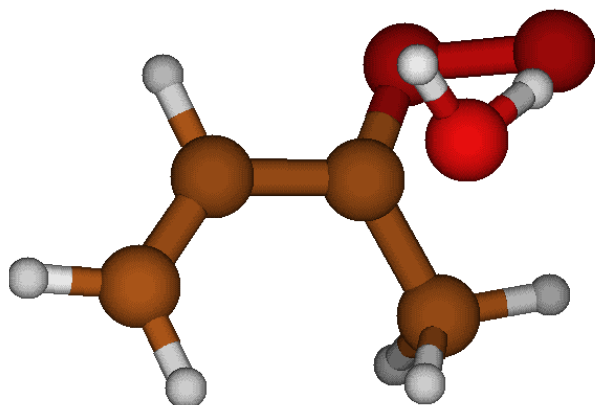

|                |           |   |           |           |           |
|----------------|-----------|---|-----------|-----------|-----------|
| 1              | 6         | 0 | 0.096795  | 0.004807  | -0.275680 |
| 2              | 8         | 0 | -0.842261 | -0.766000 | -0.754394 |
| 3              | 8         | 0 | -2.127980 | -0.227189 | -0.370471 |
| 4              | 8         | 0 | -0.725808 | 0.079180  | 1.554832  |
| 5              | 1         | 0 | -0.583657 | -0.790042 | 1.946386  |
| 6              | 1         | 0 | -1.602700 | -0.037664 | 0.859505  |
| 7              | 6         | 0 | 1.377145  | -0.701605 | -0.195220 |
| 8              | 6         | 0 | 2.536563  | -0.108681 | 0.087187  |
| 9              | 1         | 0 | 1.319500  | -1.768604 | -0.361240 |
| 10             | 1         | 0 | 2.606455  | 0.952441  | 0.272096  |
| 11             | 1         | 0 | 3.449323  | -0.681477 | 0.149333  |
| 12             | 6         | 0 | 0.037925  | 1.489363  | -0.427360 |
| 13             | 1         | 0 | -0.994569 | 1.812091  | -0.442100 |
| 14             | 1         | 0 | 0.514369  | 1.740427  | -1.376576 |
| 15             | 1         | 0 | 0.569104  | 1.981601  | 0.379287  |
| Frequencies -- | -806.5569 |   | 84.1812   |           | 184.9313  |
| Frequencies -- | 211.2148  |   | 257.8291  |           | 313.1670  |
| Frequencies -- | 342.9059  |   | 402.6911  |           | 471.3653  |
| Frequencies -- | 498.2204  |   | 573.8569  |           | 601.3477  |
| Frequencies -- | 680.0268  |   | 707.6429  |           | 788.8630  |
| Frequencies -- | 898.6793  |   | 956.7308  |           | 987.6368  |
| Frequencies -- | 1002.8543 |   | 1035.4158 |           | 1070.3564 |
| Frequencies -- | 1106.5912 |   | 1305.3303 |           | 1336.5641 |
| Frequencies -- | 1397.3269 |   | 1445.8988 |           | 1461.3039 |
| Frequencies -- | 1505.8700 |   | 1509.4564 |           | 1601.4307 |
| Frequencies -- | 1691.5810 |   | 1801.1955 |           | 3066.5856 |
| Frequencies -- | 3161.1164 |   | 3178.8631 |           | 3200.7703 |
| Frequencies -- | 3210.7818 |   | 3269.2248 |           | 3817.1273 |

Geometry b

Relative energy = 10.53 kcal mol<sup>-1</sup>

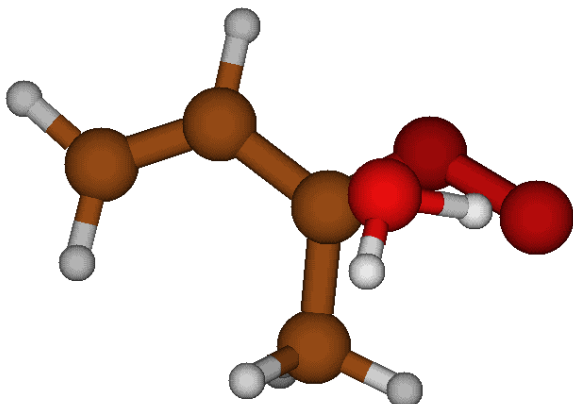

|                |           |   |           |           |           |
|----------------|-----------|---|-----------|-----------|-----------|
| 1              | 6         | 0 | 0.103536  | -0.013306 | -0.245140 |
| 2              | 8         | 0 | -0.817370 | -0.793650 | -0.734748 |
| 3              | 8         | 0 | -2.117430 | -0.231700 | -0.425306 |
| 4              | 8         | 0 | -0.775030 | -0.035873 | 1.550089  |
| 5              | 1         | 0 | -1.637472 | -0.081893 | 0.831802  |
| 6              | 1         | 0 | -0.780862 | 0.844114  | 1.938907  |
| 7              | 6         | 0 | 1.375923  | -0.717161 | -0.072217 |
| 8              | 6         | 0 | 2.553002  | -0.106230 | 0.052532  |
| 9              | 1         | 0 | 1.295142  | -1.793937 | -0.040268 |
| 10             | 1         | 0 | 2.648733  | 0.968963  | 0.031579  |
| 11             | 1         | 0 | 3.459806  | -0.676776 | 0.183327  |
| 12             | 6         | 0 | 0.056207  | 1.465045  | -0.471549 |
| 13             | 1         | 0 | -0.974845 | 1.789186  | -0.525408 |
| 14             | 1         | 0 | 0.544807  | 1.666803  | -1.426620 |
| 15             | 1         | 0 | 0.591320  | 2.003239  | 0.304652  |
| Frequencies -- | -803.9253 |   | 89.1490   |           | 198.1131  |
| Frequencies -- | 232.4033  |   | 249.7559  |           | 312.9024  |
| Frequencies -- | 337.6056  |   | 411.8848  |           | 456.5700  |
| Frequencies -- | 492.9717  |   | 565.7829  |           | 619.9861  |
| Frequencies -- | 672.4764  |   | 715.7811  |           | 798.8568  |
| Frequencies -- | 895.4729  |   | 949.0614  |           | 984.5613  |
| Frequencies -- | 1000.1212 |   | 1035.2495 |           | 1066.5264 |
| Frequencies -- | 1104.1322 |   | 1310.7011 |           | 1332.0434 |
| Frequencies -- | 1394.1137 |   | 1437.9090 |           | 1464.7692 |
| Frequencies -- | 1505.1144 |   | 1512.8790 |           | 1516.7876 |
| Frequencies -- | 1693.5497 |   | 1878.6334 |           | 3062.7141 |
| Frequencies -- | 3143.4079 |   | 3178.0814 |           | 3203.9525 |
| Frequencies -- | 3213.6932 |   | 3266.9008 |           | 3841.4265 |

**VHPOH**

Geometry a

Relative energy = -26.76 kcal mol<sup>-1</sup>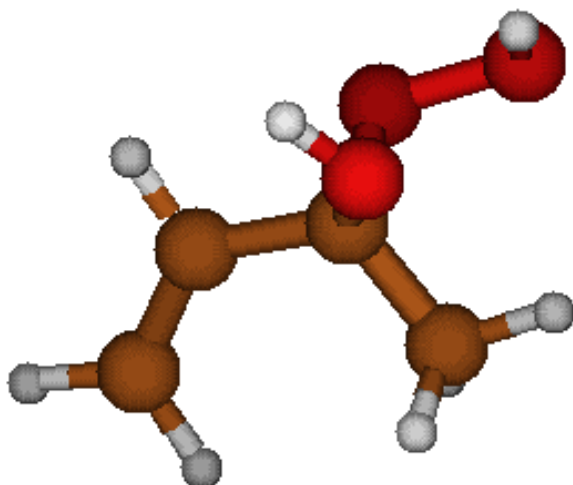

|                |           |   |           |           |           |
|----------------|-----------|---|-----------|-----------|-----------|
| 1              | 6         | 0 | 0.020989  | 0.026262  | 0.156928  |
| 2              | 8         | 0 | -0.865799 | -0.609365 | -0.769894 |
| 3              | 8         | 0 | -2.202317 | -0.086467 | -0.572193 |
| 4              | 8         | 0 | -0.415309 | -0.258740 | 1.479554  |
| 5              | 1         | 0 | -0.188513 | -1.173939 | 1.676847  |
| 6              | 1         | 0 | -2.387080 | -0.406142 | 0.323900  |
| 7              | 6         | 0 | 1.325600  | -0.666074 | -0.133761 |
| 8              | 6         | 0 | 2.488688  | -0.069546 | -0.361328 |
| 9              | 1         | 0 | 1.260053  | -1.748513 | -0.137088 |
| 10             | 1         | 0 | 2.589484  | 1.005022  | -0.381339 |
| 11             | 1         | 0 | 3.382045  | -0.650006 | -0.536527 |
| 12             | 6         | 0 | 0.024121  | 1.530367  | 0.009457  |
| 13             | 1         | 0 | -0.966596 | 1.912145  | 0.230255  |
| 14             | 1         | 0 | 0.288013  | 1.802094  | -1.008646 |
| 15             | 1         | 0 | 0.733606  | 1.969865  | 0.705093  |
| Frequencies -- | 69.7971   |   | 149.1262  |           | 229.3361  |
| Frequencies -- | 236.1173  |   | 291.2859  |           | 315.2939  |
| Frequencies -- | 351.1442  |   | 402.2086  |           | 425.4415  |
| Frequencies -- | 443.5173  |   | 500.7283  |           | 623.4160  |
| Frequencies -- | 689.5235  |   | 781.0899  |           | 894.8016  |
| Frequencies -- | 937.1683  |   | 951.2917  |           | 980.5495  |
| Frequencies -- | 1024.1114 |   | 1035.0427 |           | 1145.5435 |
| Frequencies -- | 1169.0051 |   | 1196.1006 |           | 1331.0266 |
| Frequencies -- | 1388.0185 |   | 1405.7064 |           | 1444.1300 |
| Frequencies -- | 1463.5143 |   | 1506.7559 |           | 1507.7273 |
| Frequencies -- | 1711.9751 |   | 3087.3529 |           | 3158.9796 |
| Frequencies -- | 3165.8071 |   | 3177.3391 |           | 3180.8342 |
| Frequencies -- | 3260.5345 |   | 3723.5227 |           | 3805.882  |



Geometry b

Relative energy = -26.64 kcal mol<sup>-1</sup>

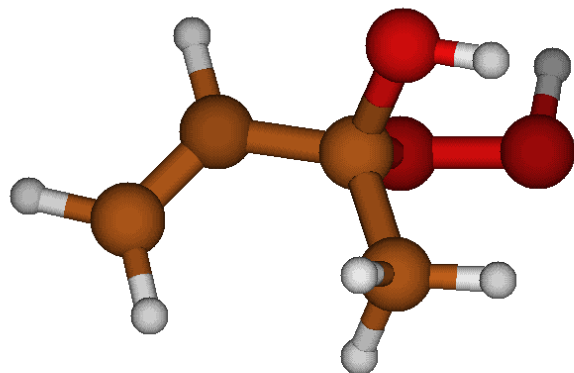

|                |           |   |           |           |           |
|----------------|-----------|---|-----------|-----------|-----------|
| 1              | 6         | 0 | 0.030843  | 0.089208  | 0.209106  |
| 2              | 8         | 0 | -0.756425 | -0.738745 | -0.673282 |
| 3              | 8         | 0 | -2.134789 | -0.270440 | -0.594456 |
| 4              | 8         | 0 | -0.467702 | 0.018331  | 1.520913  |
| 5              | 1         | 0 | -2.521566 | -1.006508 | -0.103769 |
| 6              | 1         | 0 | -1.276349 | 0.540392  | 1.543603  |
| 7              | 6         | 0 | 1.352053  | -0.627576 | 0.223052  |
| 8              | 6         | 0 | 2.451299  | -0.233838 | -0.406336 |
| 9              | 1         | 0 | 1.340614  | -1.537943 | 0.806720  |
| 10             | 1         | 0 | 2.486929  | 0.670390  | -0.995229 |
| 11             | 1         | 0 | 3.359558  | -0.814596 | -0.346054 |
| 12             | 6         | 0 | 0.054305  | 1.517581  | -0.300845 |
| 13             | 1         | 0 | -0.958279 | 1.915260  | -0.303202 |
| 14             | 1         | 0 | 0.430458  | 1.555510  | -1.319532 |
| 15             | 1         | 0 | 0.678967  | 2.132090  | 0.342213  |
| Frequencies -- | 62.1506   |   | 143.7477  |           | 189.9464  |
| Frequencies -- | 253.7147  |   | 259.8264  |           | 293.5761  |
| Frequencies -- | 351.3994  |   | 397.9616  |           | 437.1932  |
| Frequencies -- | 462.6130  |   | 501.3034  |           | 617.0535  |
| Frequencies -- | 676.7290  |   | 780.9787  |           | 883.7850  |
| Frequencies -- | 911.0227  |   | 966.8616  |           | 978.5326  |
| Frequencies -- | 1034.2065 |   | 1041.8784 |           | 1129.4282 |
| Frequencies -- | 1153.4620 |   | 1223.1173 |           | 1330.2207 |
| Frequencies -- | 1355.9002 |   | 1403.4147 |           | 1425.9346 |
| Frequencies -- | 1466.3463 |   | 1504.2881 |           | 1520.7190 |
| Frequencies -- | 1714.6837 |   | 3074.3526 |           | 3150.2909 |
| Frequencies -- | 3160.6100 |   | 3172.8632 |           | 3197.4643 |
| Frequencies -- | 3258.7111 |   | 3781.4294 |           | 3815.6786 |

***syn-trans...H<sub>2</sub>O = VHP...H<sub>2</sub>O***

Geometry a

Relative energy = 12.16 kcal mol<sup>-1</sup>

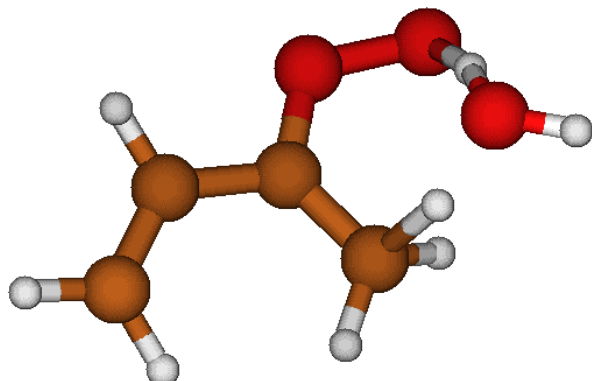

|                |            |   |           |           |           |
|----------------|------------|---|-----------|-----------|-----------|
| 1              | 6          | 0 | 0.026254  | 0.979209  | 0.829133  |
| 2              | 6          | 0 | -0.438225 | -0.193280 | 0.208507  |
| 3              | 8          | 0 | 0.336152  | -1.213066 | -0.044070 |
| 4              | 8          | 0 | 1.697094  | -1.068073 | 0.366731  |
| 5              | 6          | 0 | -1.764129 | -0.411668 | -0.364713 |
| 6              | 6          | 0 | -2.805521 | 0.398811  | -0.174064 |
| 7              | 1          | 0 | 0.961596  | 1.294094  | -0.049447 |
| 8              | 1          | 0 | -0.721674 | 1.731460  | 1.029025  |
| 9              | 1          | 0 | 0.726908  | 0.788151  | 1.636374  |
| 10             | 1          | 0 | 2.016119  | -0.046645 | -0.270412 |
| 11             | 8          | 0 | 2.026235  | 1.020553  | -0.786263 |
| 12             | 1          | 0 | 2.790270  | 1.513493  | -0.470245 |
| 13             | 1          | 0 | -1.861072 | -1.305408 | -0.965125 |
| 14             | 1          | 0 | -3.760971 | 0.181580  | -0.626388 |
| 15             | 1          | 0 | -2.737305 | 1.289526  | 0.431854  |
| Frequencies -- | -1715.1668 |   | 73.6559   |           | 131.7662  |
| Frequencies -- | 254.6795   |   | 264.3027  |           | 328.9123  |
| Frequencies -- | 440.4471   |   | 475.9273  |           | 483.4808  |
| Frequencies -- | 539.4930   |   | 576.1226  |           | 637.3117  |
| Frequencies -- | 679.2480   |   | 713.9916  |           | 778.2489  |
| Frequencies -- | 878.0055   |   | 922.1894  |           | 929.3425  |
| Frequencies -- | 993.8413   |   | 1031.4964 |           | 1035.2753 |
| Frequencies -- | 1067.0307  |   | 1094.4327 |           | 1313.0413 |
| Frequencies -- | 1329.9010  |   | 1356.8597 |           | 1408.6694 |
| Frequencies -- | 1451.5531  |   | 1475.2206 |           | 1567.4922 |
| Frequencies -- | 1608.5694  |   | 1690.1443 |           | 1838.4171 |
| Frequencies -- | 3124.7152  |   | 3178.8874 |           | 3204.4247 |
| Frequencies -- | 3233.5887  |   | 3269.6241 |           | 3835.9575 |

Geometry b

Relative energy = 11.94 kcal mol<sup>-1</sup>

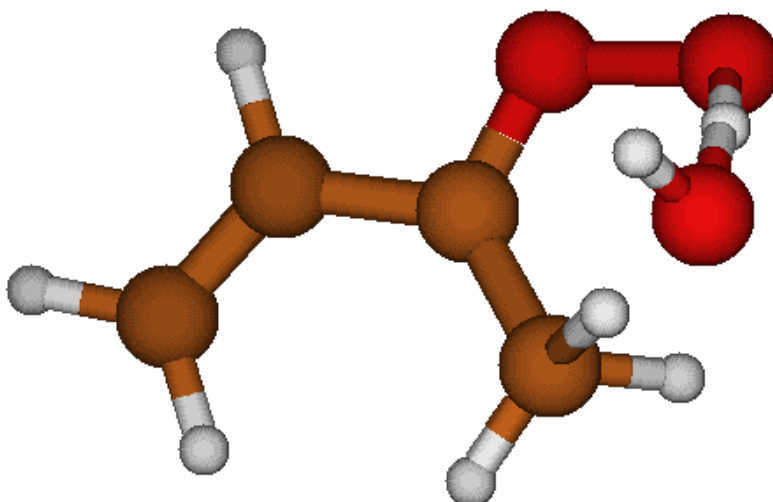

|                |            |   |           |           |           |
|----------------|------------|---|-----------|-----------|-----------|
| 1              | 6          | 0 | 0.017561  | 0.979653  | 0.831745  |
| 2              | 6          | 0 | -0.437134 | -0.193406 | 0.208458  |
| 3              | 8          | 0 | 0.346570  | -1.203232 | -0.056867 |
| 4              | 8          | 0 | 1.702657  | -1.063612 | 0.372186  |
| 5              | 6          | 0 | -1.762855 | -0.420361 | -0.363536 |
| 6              | 6          | 0 | -2.808885 | 0.385031  | -0.176117 |
| 7              | 1          | 0 | 0.955620  | 1.304888  | -0.040800 |
| 8              | 1          | 0 | -0.732918 | 1.726291  | 1.041317  |
| 9              | 1          | 0 | 0.737971  | 0.800914  | 1.624553  |
| 10             | 1          | 0 | 2.038690  | -0.022582 | -0.234005 |
| 11             | 8          | 0 | 2.110272  | 1.076252  | -0.644381 |
| 12             | 1          | 0 | 2.038345  | 1.090183  | -1.604273 |
| 13             | 1          | 0 | -1.856471 | -1.318329 | -0.958422 |
| 14             | 1          | 0 | -3.763891 | 0.159187  | -0.625186 |
| 15             | 1          | 0 | -2.745445 | 1.278690  | 0.426014  |
| Frequencies -- | -1704.6546 |   | 73.5736   |           | 135.2417  |
| Frequencies -- | 253.9871   |   | 266.8284  |           | 327.0986  |
| Frequencies -- | 448.0507   |   | 465.5533  |           | 479.3773  |
| Frequencies -- | 529.5039   |   | 573.0349  |           | 642.8930  |
| Frequencies -- | 663.0429   |   | 742.4472  |           | 784.2410  |
| Frequencies -- | 864.9158   |   | 923.6307  |           | 928.7932  |
| Frequencies -- | 993.5743   |   | 1031.5957 |           | 1036.8219 |
| Frequencies -- | 1075.7109  |   | 1131.2404 |           | 1312.7019 |
| Frequencies -- | 1355.5910  |   | 1363.0013 |           | 1430.5355 |
| Frequencies -- | 1474.4650  |   | 1523.4621 |           | 1579.7225 |
| Frequencies -- | 1592.1540  |   | 1689.4874 |           | 1711.9249 |
| Frequencies -- | 3125.3620  |   | 3178.6245 |           | 3202.3754 |
| Frequencies -- | 3236.7281  |   | 3269.4890 |           | 3832.7224 |

**VHP...H<sub>2</sub>O**

Geometry a

Relative energy = -17.21 kcal mol<sup>-1</sup>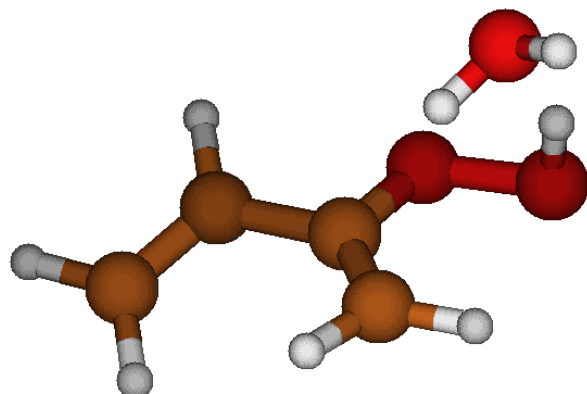

|                |           |   |           |           |           |
|----------------|-----------|---|-----------|-----------|-----------|
| 1              | 6         | 0 | 0.181948  | -0.635330 | 1.242252  |
| 2              | 6         | 0 | 0.489801  | 0.140066  | 0.194460  |
| 3              | 8         | 0 | -0.295599 | 1.132987  | -0.325585 |
| 4              | 8         | 0 | -1.541648 | 1.264757  | 0.384997  |
| 5              | 6         | 0 | 1.707406  | 0.046237  | -0.623933 |
| 6              | 6         | 0 | 2.892433  | -0.351740 | -0.165837 |
| 7              | 1         | 0 | -1.534739 | -1.484385 | -0.297638 |
| 8              | 1         | 0 | 0.868493  | -1.412189 | 1.533466  |
| 9              | 1         | 0 | -0.698928 | -0.455598 | 1.833045  |
| 10             | 1         | 0 | -2.054653 | 0.546034  | -0.042733 |
| 11             | 8         | 0 | -2.355073 | -1.151484 | -0.685960 |
| 12             | 1         | 0 | -3.052897 | -1.677380 | -0.287283 |
| 13             | 1         | 0 | 1.595279  | 0.349109  | -1.656808 |
| 14             | 1         | 0 | 3.745804  | -0.418558 | -0.823347 |
| 15             | 1         | 0 | 3.040679  | -0.612502 | 0.872026  |
| Frequencies -- | 58.7952   |   | 84.2872   |           | 115.4096  |
| Frequencies -- | 159.5406  |   | 204.2848  |           | 229.2551  |
| Frequencies -- | 254.6363  |   | 328.1704  |           | 359.2160  |
| Frequencies -- | 424.8692  |   | 428.0981  |           | 508.6751  |
| Frequencies -- | 591.0468  |   | 687.6844  |           | 753.2525  |
| Frequencies -- | 762.6515  |   | 840.0211  |           | 867.1096  |
| Frequencies -- | 926.5550  |   | 969.7516  |           | 990.3591  |
| Frequencies -- | 1029.7465 |   | 1088.3186 |           | 1253.4371 |
| Frequencies -- | 1333.8494 |   | 1421.4485 |           | 1469.2171 |
| Frequencies -- | 1532.4440 |   | 1648.7185 |           | 1678.3021 |
| Frequencies -- | 1696.0539 |   | 3169.0329 |           | 3188.2244 |
| Frequencies -- | 3202.7754 |   | 3260.0955 |           | 3301.3985 |
| Frequencies -- | 3501.1082 |   | 3738.0065 |           | 3893.0082 |

Geometry b

Relative energy = -17.66 kcal mol<sup>-1</sup>

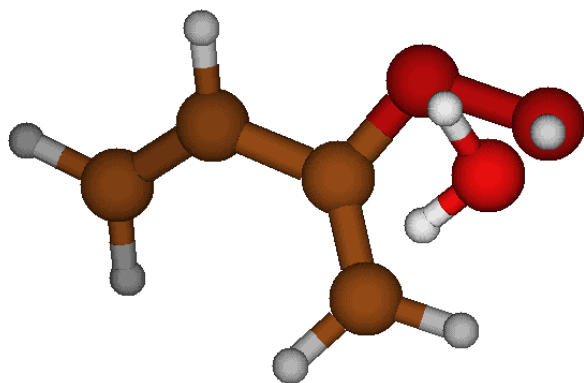

|                |           |   |           |           |           |
|----------------|-----------|---|-----------|-----------|-----------|
| 1              | 6         | 0 | -0.210776 | 0.510265  | 1.320295  |
| 2              | 6         | 0 | -0.481730 | -0.159872 | 0.193469  |
| 3              | 8         | 0 | 0.340506  | -1.073175 | -0.412277 |
| 4              | 8         | 0 | 1.567478  | -1.262266 | 0.318127  |
| 5              | 6         | 0 | -1.688694 | -0.017277 | -0.633525 |
| 6              | 6         | 0 | -2.886167 | 0.333874  | -0.169276 |
| 7              | 1         | 0 | 1.551801  | 1.543583  | -0.089286 |
| 8              | 1         | 0 | -0.921730 | 1.235522  | 1.678301  |
| 9              | 1         | 0 | 0.667860  | 0.297365  | 1.903575  |
| 10             | 1         | 0 | 2.077684  | -0.490741 | -0.011252 |
| 11             | 8         | 0 | 2.378931  | 1.245669  | -0.490758 |
| 12             | 1         | 0 | 2.277218  | 1.419632  | -1.430217 |
| 13             | 1         | 0 | -1.559153 | -0.244840 | -1.683799 |
| 14             | 1         | 0 | -3.729028 | 0.437647  | -0.835426 |
| 15             | 1         | 0 | -3.055777 | 0.518070  | 0.881586  |
| Frequencies -- | 58.8468   |   | 77.4634   |           | 108.8680  |
| Frequencies -- | 160.6063  |   | 216.8647  |           | 229.7746  |
| Frequencies -- | 257.0245  |   | 287.0584  |           | 360.3984  |
| Frequencies -- | 422.0656  |   | 461.9540  |           | 508.2914  |
| Frequencies -- | 588.1264  |   | 728.0656  |           | 751.9346  |
| Frequencies -- | 786.2670  |   | 848.8605  |           | 866.6547  |
| Frequencies -- | 926.0643  |   | 969.0438  |           | 989.2951  |
| Frequencies -- | 1029.1321 |   | 1087.6721 |           | 1250.8469 |
| Frequencies -- | 1334.7156 |   | 1422.3986 |           | 1469.9034 |
| Frequencies -- | 1513.4219 |   | 1646.8323 |           | 1680.3985 |
| Frequencies -- | 1696.5475 |   | 3169.3860 |           | 3184.9715 |
| Frequencies -- | 3203.0888 |   | 3260.5771 |           | 3301.2142 |
| Frequencies -- | 3487.7504 |   | 3742.9802 |           | 3889.7963 |

*syn-trans...H<sub>2</sub>O = VHP...H<sub>2</sub>O; spectator*

Geometry a

Relative energy = 13.33 kcal mol<sup>-1</sup>

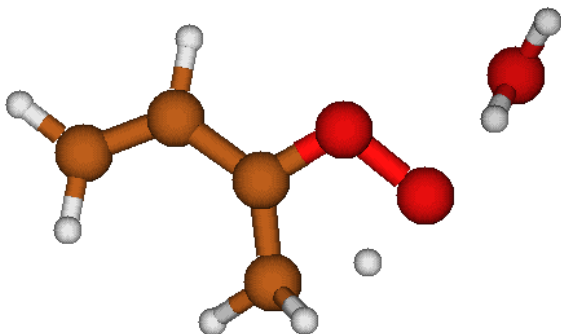

|                |            |   |           |           |           |
|----------------|------------|---|-----------|-----------|-----------|
| 1              | 6          | 0 | -2.930724 | -0.787681 | 0.220770  |
| 2              | 6          | 0 | -1.654916 | -0.904493 | -0.154089 |
| 3              | 6          | 0 | -0.732938 | 0.213944  | -0.151998 |
| 4              | 6          | 0 | -0.793171 | 1.447695  | 0.516853  |
| 5              | 8          | 0 | 0.424719  | -0.070353 | -0.711769 |
| 6              | 8          | 0 | 1.338249  | 0.976023  | -0.443746 |
| 7              | 1          | 0 | -3.344569 | 0.162601  | 0.524279  |
| 8              | 1          | 0 | -3.586964 | -1.644309 | 0.230951  |
| 9              | 1          | 0 | -1.248280 | -1.852519 | -0.478760 |
| 10             | 1          | 0 | 0.559711  | 1.401142  | 0.539903  |
| 11             | 1          | 0 | -0.655640 | 2.333809  | -0.097706 |
| 12             | 1          | 0 | -1.547993 | 1.549526  | 1.281948  |
| 13             | 1          | 0 | 2.715570  | -0.210671 | 0.225273  |
| 14             | 8          | 0 | 3.248646  | -0.937737 | 0.577960  |
| 15             | 1          | 0 | 3.685748  | -1.299829 | -0.194656 |
| Frequencies -- | -1623.8460 |   | 11.1229   |           | 41.2886   |
| Frequencies -- | 87.2978    |   | 114.7241  |           | 168.5606  |
| Frequencies -- | 246.9054   |   | 280.3284  |           | 314.7069  |
| Frequencies -- | 470.7153   |   | 488.8173  |           | 557.6282  |
| Frequencies -- | 613.5770   |   | 634.1574  |           | 742.5515  |
| Frequencies -- | 760.3229   |   | 901.7057  |           | 932.4415  |
| Frequencies -- | 952.4302   |   | 999.5443  |           | 1027.1984 |
| Frequencies -- | 1038.1109  |   | 1069.4271 |           | 1294.8528 |
| Frequencies -- | 1332.7958  |   | 1352.5309 |           | 1466.8781 |
| Frequencies -- | 1472.6696  |   | 1554.6363 |           | 1678.9579 |
| Frequencies -- | 1683.3409  |   | 1822.6553 |           | 3116.6088 |
| Frequencies -- | 3175.5300  |   | 3201.0990 |           | 3227.7275 |
| Frequencies -- | 3269.2147  |   | 3700.7887 |           | 3901.3284 |

Geometry b

Relative energy = 12.86 kcal mol<sup>-1</sup>

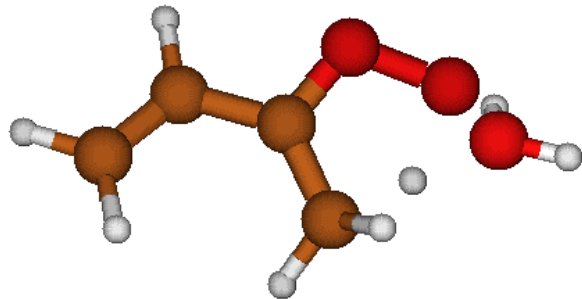

|                |            |   |           |           |           |
|----------------|------------|---|-----------|-----------|-----------|
| 1              | 6          | 0 | 2.842589  | -0.738115 | -0.255600 |
| 2              | 6          | 0 | 1.966605  | 0.260018  | -0.389128 |
| 3              | 6          | 0 | 0.600034  | 0.170898  | 0.088609  |
| 4              | 6          | 0 | 0.014999  | -0.690530 | 1.026894  |
| 5              | 8          | 0 | -0.143951 | 1.192582  | -0.294159 |
| 6              | 8          | 0 | -1.369216 | 1.166109  | 0.415969  |
| 7              | 1          | 0 | 2.562082  | -1.675809 | 0.200850  |
| 8              | 1          | 0 | 3.858683  | -0.635924 | -0.604630 |
| 9              | 1          | 0 | 2.241778  | 1.187748  | -0.872242 |
| 10             | 1          | 0 | -0.837486 | 0.329887  | 1.295141  |
| 11             | 1          | 0 | -0.877046 | -1.222294 | 0.695759  |
| 12             | 1          | 0 | 0.691416  | -1.276894 | 1.630796  |
| 13             | 1          | 0 | -2.450495 | -0.153437 | -0.415841 |
| 14             | 8          | 0 | -2.746203 | -1.043237 | -0.668696 |
| 15             | 1          | 0 | -3.659347 | -1.090543 | -0.379395 |
| Frequencies -- | -1619.7920 |   | 40.4798   |           | 92.9244   |
| Frequencies -- | 120.7195   |   | 147.0689  |           | 182.0655  |
| Frequencies -- | 249.2568   |   | 287.3693  |           | 389.6724  |
| Frequencies -- | 474.4114   |   | 502.3374  |           | 584.1612  |
| Frequencies -- | 622.1154   |   | 646.6367  |           | 747.8941  |
| Frequencies -- | 773.7153   |   | 911.4622  |           | 937.2180  |
| Frequencies -- | 957.8210   |   | 999.0272  |           | 1027.4762 |
| Frequencies -- | 1043.2972  |   | 1071.3300 |           | 1291.0009 |
| Frequencies -- | 1327.6510  |   | 1354.5021 |           | 1467.5326 |
| Frequencies -- | 1473.7311  |   | 1561.0778 |           | 1679.3621 |
| Frequencies -- | 1683.7954  |   | 1817.5718 |           | 3080.9513 |
| Frequencies -- | 3175.1911  |   | 3198.6914 |           | 3221.3979 |
| Frequencies -- | 3268.9692  |   | 3639.8589 |           | 3897.2997 |

**VHP;trans...H<sub>2</sub>O**

Geometry a

Relative energy = -14.22 kcal mol<sup>-1</sup>

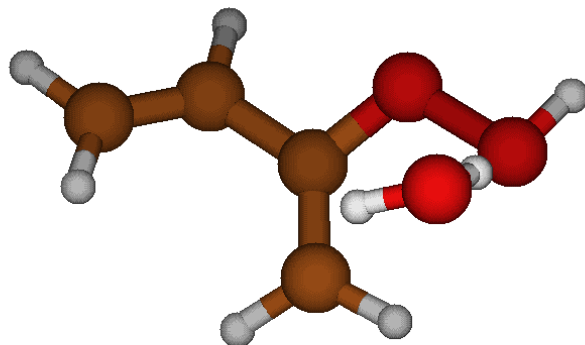

|                |           |   |           |           |           |
|----------------|-----------|---|-----------|-----------|-----------|
| 1              | 6         | 0 | -2.685189 | -0.770786 | 0.346657  |
| 2              | 6         | 0 | -1.868960 | 0.280972  | 0.349671  |
| 3              | 6         | 0 | -0.540005 | 0.296512  | -0.274838 |
| 4              | 6         | 0 | -0.165615 | -0.361384 | -1.372960 |
| 5              | 8         | 0 | 0.262290  | 1.128807  | 0.470052  |
| 6              | 8         | 0 | 1.568971  | 1.232610  | -0.157960 |
| 7              | 1         | 0 | -2.394755 | -1.711573 | -0.097878 |
| 8              | 1         | 0 | -3.666411 | -0.710878 | 0.791985  |
| 9              | 1         | 0 | -2.165534 | 1.198849  | 0.840627  |
| 10             | 1         | 0 | 1.872616  | 2.033779  | 0.288238  |
| 11             | 1         | 0 | 0.833673  | -0.305526 | -1.765128 |
| 12             | 1         | 0 | -0.902967 | -0.944110 | -1.898243 |
| 13             | 1         | 0 | 2.328571  | -0.627562 | 0.385954  |
| 14             | 8         | 0 | 2.430080  | -1.571786 | 0.542455  |
| 15             | 1         | 0 | 1.562691  | -1.921913 | 0.326895  |
| Frequencies -- | 18.8629   |   | 62.6694   |           | 83.1228   |
| Frequencies -- | 96.6136   |   | 119.9030  |           | 168.4570  |
| Frequencies -- | 178.2037  |   | 243.3064  |           | 289.5296  |
| Frequencies -- | 348.5398  |   | 408.5999  |           | 421.6917  |
| Frequencies -- | 500.8707  |   | 586.6265  |           | 730.2464  |
| Frequencies -- | 741.7971  |   | 842.6029  |           | 864.2300  |
| Frequencies -- | 916.8610  |   | 968.7429  |           | 981.8101  |
| Frequencies -- | 1024.8529 |   | 1090.1636 |           | 1250.2508 |
| Frequencies -- | 1334.0461 |   | 1390.7864 |           | 1445.1525 |
| Frequencies -- | 1472.9841 |   | 1677.4963 |           | 1694.0508 |
| Frequencies -- | 1701.2668 |   | 3169.8590 |           | 3185.6676 |
| Frequencies -- | 3210.6659 |   | 3261.8643 |           | 3308.9523 |
| Frequencies -- | 3792.4662 |   | 3804.9132 |           | 3903.9729 |



Geometry b

Relative energy = -14.19 kcal mol<sup>-1</sup>

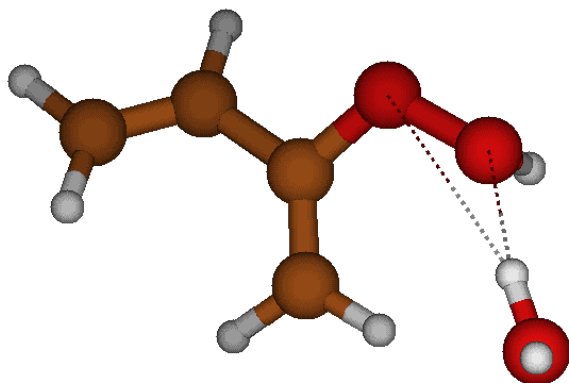

|                |           |   |           |           |           |
|----------------|-----------|---|-----------|-----------|-----------|
| 1              | 6         | 0 | 2.938903  | -0.772898 | -0.363353 |
| 2              | 6         | 0 | 2.124956  | 0.229502  | -0.038415 |
| 3              | 6         | 0 | 0.680516  | 0.082433  | 0.182241  |
| 4              | 6         | 0 | 0.054587  | -0.981823 | 0.685862  |
| 5              | 8         | 0 | 0.080039  | 1.271413  | -0.194042 |
| 6              | 8         | 0 | -1.335040 | 1.262729  | 0.059949  |
| 7              | 1         | 0 | 2.568065  | -1.775664 | -0.518305 |
| 8              | 1         | 0 | 3.998854  | -0.608408 | -0.482922 |
| 9              | 1         | 0 | 2.513735  | 1.234276  | 0.065338  |
| 10             | 1         | 0 | -1.365997 | 1.451075  | 1.010024  |
| 11             | 1         | 0 | -1.015431 | -1.042365 | 0.783287  |
| 12             | 1         | 0 | 0.652285  | -1.821747 | 0.997802  |
| 13             | 1         | 0 | -2.679898 | -0.188801 | -0.445728 |
| 14             | 8         | 0 | -3.293670 | -0.912039 | -0.274389 |
| 15             | 1         | 0 | -3.076020 | -1.568473 | -0.939648 |
| Frequencies -- | 30.0012   |   | 81.5532   |           | 90.1021   |
| Frequencies -- | 119.6322  |   | 136.3285  |           | 176.5566  |
| Frequencies -- | 184.9440  |   | 252.6182  |           | 302.6837  |
| Frequencies -- | 358.6996  |   | 412.8368  |           | 460.4775  |
| Frequencies -- | 507.6841  |   | 596.5048  |           | 742.0151  |
| Frequencies -- | 757.7345  |   | 867.6883  |           | 882.2439  |
| Frequencies -- | 922.5481  |   | 968.5072  |           | 982.6309  |
| Frequencies -- | 1026.7891 |   | 1090.3249 |           | 1233.7579 |
| Frequencies -- | 1333.1302 |   | 1390.2259 |           | 1440.9317 |
| Frequencies -- | 1472.7418 |   | 1668.3157 |           | 1692.9582 |
| Frequencies -- | 1698.4573 |   | 3169.3909 |           | 3185.7531 |
| Frequencies -- | 3201.8314 |   | 3261.1948 |           | 3298.0041 |
| Frequencies -- | 3731.6328 |   | 3778.9128 |           | 3906.2494 |

***syn-cis...H<sub>2</sub>O = VHPOH***

Geometry a

Relative energy = 9.17 kcal mol<sup>-1</sup>

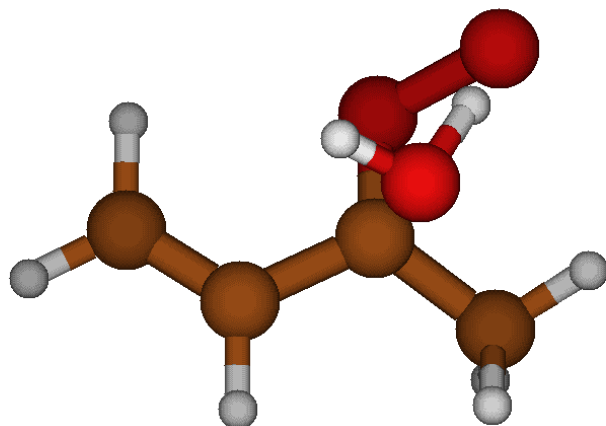

|                |           |   |           |           |           |
|----------------|-----------|---|-----------|-----------|-----------|
| 1              | 6         | 0 | 0.076443  | 0.343639  | -0.222305 |
| 2              | 8         | 0 | -0.279064 | -0.783420 | -0.764280 |
| 3              | 8         | 0 | -1.688818 | -1.003933 | -0.498672 |
| 4              | 8         | 0 | -0.816056 | -0.064608 | 1.544625  |
| 5              | 1         | 0 | -0.265599 | -0.740835 | 1.954992  |
| 6              | 1         | 0 | -1.434025 | -0.593689 | 0.795269  |
| 7              | 6         | 0 | 1.520157  | 0.469064  | 0.022322  |
| 8              | 6         | 0 | 2.354578  | -0.569880 | -0.016738 |
| 9              | 1         | 0 | 1.877909  | 1.465077  | 0.239726  |
| 10             | 1         | 0 | 1.993135  | -1.565998 | -0.224602 |
| 11             | 1         | 0 | 3.412755  | -0.438554 | 0.150696  |
| 12             | 6         | 0 | -0.721484 | 1.590456  | -0.408857 |
| 13             | 1         | 0 | -1.772759 | 1.357662  | -0.510082 |
| 14             | 1         | 0 | -0.360663 | 2.062194  | -1.326594 |
| 15             | 1         | 0 | -0.557412 | 2.270160  | 0.420681  |
| Frequencies -- | -663.2814 |   | 84.2144   |           | 188.5574  |
| Frequencies -- | 200.4108  |   | 222.8651  |           | 309.6968  |
| Frequencies -- | 331.2155  |   | 392.3162  |           | 473.1180  |
| Frequencies -- | 505.8716  |   | 573.1798  |           | 608.1536  |
| Frequencies -- | 677.5527  |   | 699.0772  |           | 796.5091  |
| Frequencies -- | 896.8130  |   | 982.3474  |           | 1016.8755 |
| Frequencies -- | 1028.6415 |   | 1032.6439 |           | 1079.3518 |
| Frequencies -- | 1154.8919 |   | 1271.7814 |           | 1340.1440 |
| Frequencies -- | 1405.4248 |   | 1437.8650 |           | 1468.7964 |
| Frequencies -- | 1499.2398 |   | 1515.9329 |           | 1612.9980 |
| Frequencies -- | 1688.2184 |   | 1825.4816 |           | 3051.7700 |
| Frequencies -- | 3151.2596 |   | 3175.7266 |           | 3208.2582 |
| Frequencies -- | 3214.3332 |   | 3271.2382 |           | 3820.2684 |

Geometry b

Relative energy = 10.72 kcal mol<sup>-1</sup>

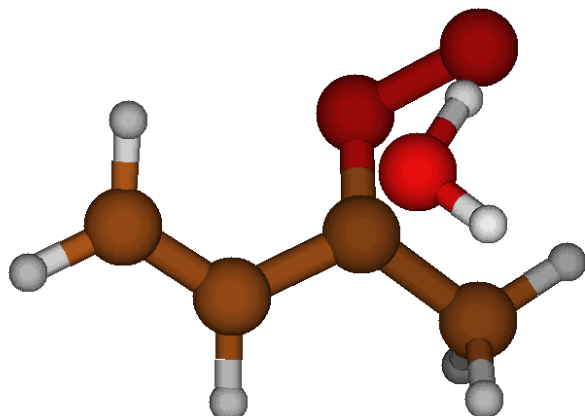

|                |           |   |           |           |           |
|----------------|-----------|---|-----------|-----------|-----------|
| 1              | 6         | 0 | 0.076567  | 0.366363  | -0.218684 |
| 2              | 8         | 0 | -0.299432 | -0.713357 | -0.840192 |
| 3              | 8         | 0 | -1.693006 | -0.970608 | -0.525976 |
| 4              | 8         | 0 | -0.645585 | -0.328771 | 1.526931  |
| 5              | 1         | 0 | -1.353808 | -0.739461 | 0.756408  |
| 6              | 1         | 0 | -1.126392 | 0.352549  | 2.006803  |
| 7              | 6         | 0 | 1.528029  | 0.482429  | -0.052944 |
| 8              | 6         | 0 | 2.320570  | -0.586817 | 0.010720  |
| 9              | 1         | 0 | 1.925418  | 1.483456  | 0.037436  |
| 10             | 1         | 0 | 1.908308  | -1.582951 | -0.042442 |
| 11             | 1         | 0 | 3.388632  | -0.482499 | 0.127326  |
| 12             | 6         | 0 | -0.738915 | 1.617774  | -0.276881 |
| 13             | 1         | 0 | -1.793759 | 1.383269  | -0.330011 |
| 14             | 1         | 0 | -0.442704 | 2.148182  | -1.185708 |
| 15             | 1         | 0 | -0.519019 | 2.260845  | 0.570827  |
| Frequencies -- | -778.7290 |   | 75.6379   |           | 205.7397  |
| Frequencies -- | 217.5452  |   | 228.7024  |           | 307.9544  |
| Frequencies -- | 326.5040  |   | 404.1722  |           | 460.3552  |
| Frequencies -- | 507.1050  |   | 579.3972  |           | 617.1243  |
| Frequencies -- | 668.3553  |   | 700.9135  |           | 801.9431  |
| Frequencies -- | 899.7381  |   | 945.7280  |           | 1000.6411 |
| Frequencies -- | 1017.4813 |   | 1018.8314 |           | 1068.4232 |
| Frequencies -- | 1112.6826 |   | 1267.1694 |           | 1341.3092 |
| Frequencies -- | 1400.5293 |   | 1436.2913 |           | 1463.3959 |
| Frequencies -- | 1498.6358 |   | 1508.2548 |           | 1514.1600 |
| Frequencies -- | 1689.4044 |   | 1873.3174 |           | 3049.7893 |
| Frequencies -- | 3133.2123 |   | 3177.6426 |           | 3202.8972 |
| Frequencies -- | 3206.4094 |   | 3274.9449 |           | 3840.5095 |

**VHPOH**

Geometry a

Relative energy = 27.40 kcal mol<sup>-1</sup>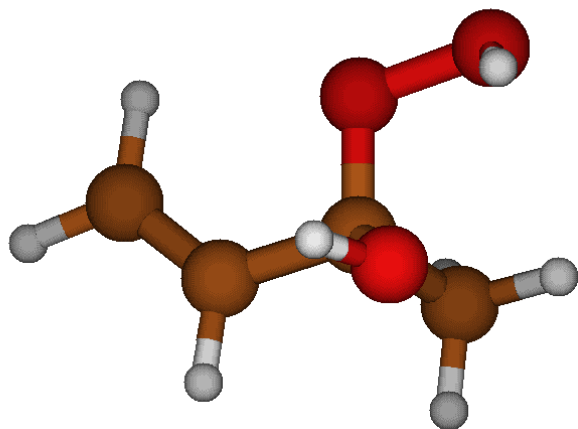

|                |           |   |           |           |           |
|----------------|-----------|---|-----------|-----------|-----------|
| 1              | 6         | 0 | -0.005013 | 0.341376  | 0.038973  |
| 2              | 8         | 0 | -0.420685 | -1.012154 | -0.105800 |
| 3              | 8         | 0 | -1.864638 | -1.047694 | -0.157160 |
| 4              | 8         | 0 | -0.501348 | 0.854664  | 1.269009  |
| 5              | 1         | 0 | 0.000751  | 0.434303  | 1.976302  |
| 6              | 1         | 0 | -2.081678 | -0.755572 | 0.741079  |
| 7              | 6         | 0 | 1.500000  | 0.308830  | 0.058301  |
| 8              | 6         | 0 | 2.260281  | -0.762311 | -0.137807 |
| 9              | 1         | 0 | 1.945726  | 1.274459  | 0.261593  |
| 10             | 1         | 0 | 1.831860  | -1.729823 | -0.348117 |
| 11             | 1         | 0 | 3.336779  | -0.686503 | -0.096153 |
| 12             | 6         | 0 | -0.543207 | 1.236464  | -1.060475 |
| 13             | 1         | 0 | -1.624643 | 1.295908  | -0.994827 |
| 14             | 1         | 0 | -0.263365 | 0.828401  | -2.027879 |
| 15             | 1         | 0 | -0.124425 | 2.234147  | -0.954340 |
| Frequencies -- | 56.8928   |   | 144.5237  |           | 208.8953  |
| Frequencies -- | 236.0355  |   | 298.0344  |           | 318.0550  |
| Frequencies -- | 341.6076  |   | 395.4223  |           | 449.5740  |
| Frequencies -- | 476.3087  |   | 541.6937  |           | 586.2015  |
| Frequencies -- | 705.8692  |   | 778.5015  |           | 901.7022  |
| Frequencies -- | 950.1916  |   | 960.6471  |           | 983.9387  |
| Frequencies -- | 1035.7976 |   | 1048.2743 |           | 1110.2349 |
| Frequencies -- | 1170.8587 |   | 1251.0122 |           | 1328.5902 |
| Frequencies -- | 1373.3061 |   | 1411.8717 |           | 1423.9101 |
| Frequencies -- | 1464.0146 |   | 1498.0495 |           | 1503.7572 |
| Frequencies -- | 1704.1868 |   | 3081.4192 |           | 3159.2936 |
| Frequencies -- | 3170.6931 |   | 3175.3728 |           | 3184.3036 |
| Frequencies -- | 3267.1688 |   | 3724.0059 |           | 3798.5698 |

***syn-cis...H<sub>2</sub>O = VHP...H<sub>2</sub>O***

Geometry a

Relative energy = 12.32 kcal mol<sup>-1</sup>

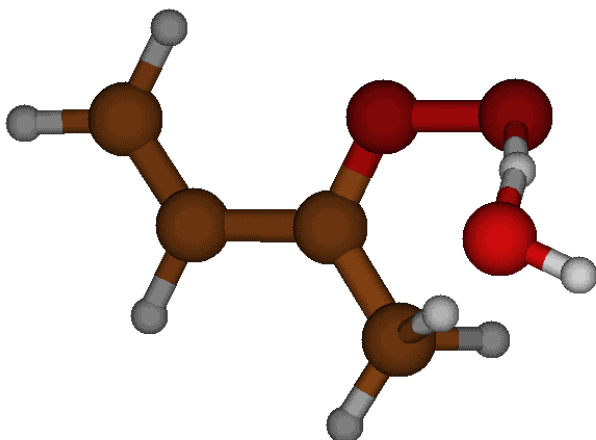

|                |            |   |           |           |           |
|----------------|------------|---|-----------|-----------|-----------|
| 1              | 6          | 0 | -0.499055 | 1.296463  | -0.683845 |
| 2              | 6          | 0 | 0.418244  | 0.280551  | -0.357324 |
| 3              | 8          | 0 | 0.089437  | -0.974666 | -0.285207 |
| 4              | 8          | 0 | -1.291598 | -1.259071 | -0.543523 |
| 5              | 6          | 0 | 1.792620  | 0.560679  | 0.059298  |
| 6              | 6          | 0 | 2.630785  | -0.359543 | 0.539832  |
| 7              | 1          | 0 | -1.332822 | 1.109067  | 0.312575  |
| 8              | 1          | 0 | -0.070087 | 2.283009  | -0.783191 |
| 9              | 1          | 0 | -1.218555 | 1.011619  | -1.445543 |
| 10             | 1          | 0 | -1.839036 | -0.540092 | 0.339258  |
| 11             | 8          | 0 | -2.124681 | 0.333934  | 1.063396  |
| 12             | 1          | 0 | -3.050273 | 0.559693  | 0.925651  |
| 13             | 1          | 0 | 2.104516  | 1.588599  | -0.053833 |
| 14             | 1          | 0 | 3.640052  | -0.094958 | 0.815816  |
| 15             | 1          | 0 | 2.325374  | -1.387406 | 0.664167  |
| Frequencies -- | -1677.2913 |   | 51.8937   |           | 144.3724  |
| Frequencies -- | 231.1471   |   | 248.9179  |           | 330.7382  |
| Frequencies -- | 436.7246   |   | 453.7879  |           | 507.8745  |
| Frequencies -- | 538.0216   |   | 582.2478  |           | 630.0122  |
| Frequencies -- | 679.5402   |   | 721.6996  |           | 774.3263  |
| Frequencies -- | 871.4765   |   | 924.3257  |           | 940.2022  |
| Frequencies -- | 1007.1516  |   | 1025.3979 |           | 1045.2410 |
| Frequencies -- | 1086.5071  |   | 1101.7038 |           | 1321.0917 |
| Frequencies -- | 1357.4213  |   | 1367.0415 |           | 1404.6809 |
| Frequencies -- | 1458.0239  |   | 1463.5304 |           | 1552.9322 |
| Frequencies -- | 1604.4416  |   | 1692.3058 |           | 1839.0213 |
| Frequencies -- | 3121.8912  |   | 3178.4399 |           | 3209.9399 |
| Frequencies -- | 3228.0063  |   | 3273.7666 |           | 3835.9199 |

Geometry b

Relative energy = 12.07 kcal mol<sup>-1</sup>

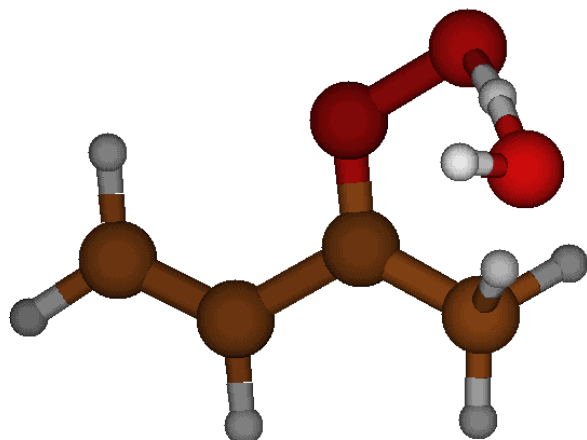

|                |            |   |           |           |           |
|----------------|------------|---|-----------|-----------|-----------|
| 1              | 6          | 0 | -0.491504 | 1.299606  | -0.681344 |
| 2              | 6          | 0 | 0.417691  | 0.281625  | -0.343843 |
| 3              | 8          | 0 | 0.080840  | -0.970005 | -0.254291 |
| 4              | 8          | 0 | -1.291751 | -1.259911 | -0.550994 |
| 5              | 6          | 0 | 1.792297  | 0.560232  | 0.075783  |
| 6              | 6          | 0 | 2.647392  | -0.367793 | 0.509331  |
| 7              | 1          | 0 | -1.340301 | 1.118961  | 0.303040  |
| 8              | 1          | 0 | -0.061269 | 2.284617  | -0.787463 |
| 9              | 1          | 0 | -1.223149 | 1.015159  | -1.431870 |
| 10             | 1          | 0 | -1.880498 | -0.524754 | 0.301016  |
| 11             | 8          | 0 | -2.257045 | 0.372083  | 0.932660  |
| 12             | 1          | 0 | -2.053239 | 0.237915  | 1.863995  |
| 13             | 1          | 0 | 2.092336  | 1.595025  | -0.002573 |
| 14             | 1          | 0 | 3.656067  | -0.101432 | 0.785756  |
| 15             | 1          | 0 | 2.358435  | -1.404837 | 0.589541  |
| Frequencies -- | -1659.8567 |   | 54.2417   |           | 147.4361  |
| Frequencies -- | 231.5930   |   | 250.0026  |           | 328.8234  |
| Frequencies -- | 431.0516   |   | 464.5993  |           | 495.2850  |
| Frequencies -- | 529.5229   |   | 582.0860  |           | 640.2210  |
| Frequencies -- | 650.7053   |   | 740.1933  |           | 794.6366  |
| Frequencies -- | 859.3922   |   | 922.9021  |           | 942.8757  |
| Frequencies -- | 1005.8419  |   | 1027.4319 |           | 1046.3525 |
| Frequencies -- | 1096.6992  |   | 1153.4891 |           | 1323.9984 |
| Frequencies -- | 1354.6651  |   | 1359.2454 |           | 1449.9170 |
| Frequencies -- | 1459.7587  |   | 1544.6848 |           | 1560.7880 |
| Frequencies -- | 1599.2501  |   | 1692.5124 |           | 1704.9322 |
| Frequencies -- | 3122.4702  |   | 3177.9713 |           | 3208.8211 |
| Frequencies -- | 3230.7335  |   | 3273.0327 |           | 3832.0606 |

VHP...H<sub>2</sub>O

Geometry a

Relative energy = -19.06 kcal mol<sup>-1</sup>

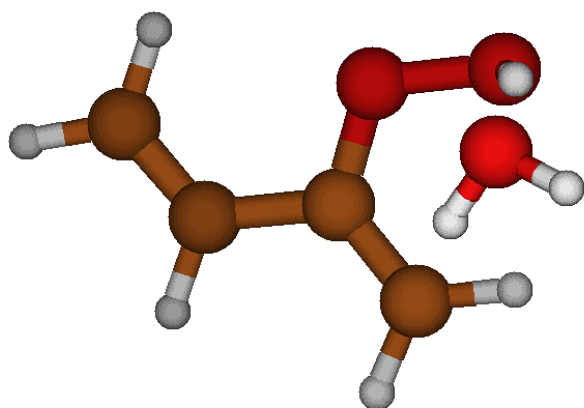

|                |           |   |           |           |           |
|----------------|-----------|---|-----------|-----------|-----------|
| 1              | 6         | 0 | -0.199658 | 1.441808  | -0.817304 |
| 2              | 6         | 0 | 0.488350  | 0.380121  | -0.370220 |
| 3              | 8         | 0 | 0.054874  | -0.914006 | -0.386677 |
| 4              | 8         | 0 | -1.254450 | -1.034476 | -0.974156 |
| 5              | 6         | 0 | 1.820564  | 0.486077  | 0.224090  |
| 6              | 6         | 0 | 2.537175  | -0.537614 | 0.689529  |
| 7              | 1         | 0 | -1.676544 | 0.830724  | 1.147424  |
| 8              | 1         | 0 | 0.259414  | 2.414592  | -0.756187 |
| 9              | 1         | 0 | -1.155679 | 1.338582  | -1.298763 |
| 10             | 1         | 0 | -1.807053 | -0.818365 | -0.193138 |
| 11             | 8         | 0 | -2.327582 | 0.131984  | 1.291293  |
| 12             | 1         | 0 | -3.178854 | 0.576376  | 1.270483  |
| 13             | 1         | 0 | 2.214779  | 1.492341  | 0.261902  |
| 14             | 1         | 0 | 3.518338  | -0.375053 | 1.108811  |
| 15             | 1         | 0 | 2.164287  | -1.549564 | 0.659213  |
| Frequencies -- | 47.8616   |   | 93.7149   |           | 128.1673  |
| Frequencies -- | 169.0544  |   | 182.4060  |           | 225.8452  |
| Frequencies -- | 244.7701  |   | 323.4094  |           | 366.1745  |
| Frequencies -- | 417.1388  |   | 468.4122  |           | 490.8694  |
| Frequencies -- | 583.9379  |   | 683.9367  |           | 749.9291  |
| Frequencies -- | 773.6256  |   | 839.4133  |           | 857.5646  |
| Frequencies -- | 930.8243  |   | 963.7070  |           | 994.6559  |
| Frequencies -- | 1022.4231 |   | 1072.6067 |           | 1326.5761 |
| Frequencies -- | 1333.5519 |   | 1417.4114 |           | 1466.7914 |
| Frequencies -- | 1535.1374 |   | 1642.3979 |           | 1649.4228 |
| Frequencies -- | 1708.9027 |   | 3176.9886 |           | 3194.5157 |
| Frequencies -- | 3202.2470 |   | 3270.5188 |           | 3302.1174 |
| Frequencies -- | 3506.9285 |   | 3755.5070 |           | 3895.4757 |

Geometry b

Relative energy = -19.68 kcal mol<sup>-1</sup>

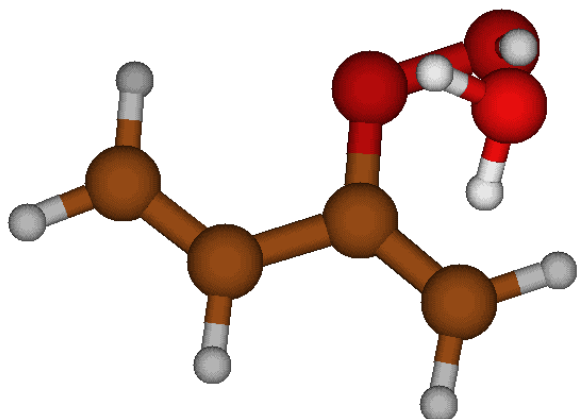

|                |           |   |           |           |           |
|----------------|-----------|---|-----------|-----------|-----------|
| 1              | 6         | 0 | 0.170765  | 1.689933  | 0.192702  |
| 2              | 6         | 0 | -0.472576 | 0.513215  | 0.206915  |
| 3              | 8         | 0 | 0.012672  | -0.653124 | 0.726951  |
| 4              | 8         | 0 | 1.323327  | -0.479436 | 1.298519  |
| 5              | 6         | 0 | -1.803713 | 0.324219  | -0.368274 |
| 6              | 6         | 0 | -2.480609 | -0.825032 | -0.378764 |
| 7              | 1         | 0 | 1.683513  | 0.382663  | -1.396280 |
| 8              | 1         | 0 | -0.324431 | 2.541382  | -0.243829 |
| 9              | 1         | 0 | 1.129955  | 1.821210  | 0.661323  |
| 10             | 1         | 0 | 1.867041  | -0.572603 | 0.486482  |
| 11             | 8         | 0 | 2.291656  | -0.358684 | -1.281748 |
| 12             | 1         | 0 | 1.912302  | -1.068801 | -1.806883 |
| 13             | 1         | 0 | -2.234190 | 1.216198  | -0.802457 |
| 14             | 1         | 0 | -3.464480 | -0.878884 | -0.819185 |
| 15             | 1         | 0 | -2.074152 | -1.725214 | 0.055583  |
| Frequencies -- | 44.9263   |   | 89.3525   |           | 128.2721  |
| Frequencies -- | 173.1129  |   | 202.8612  |           | 228.0720  |
| Frequencies -- | 246.3972  |   | 298.4040  |           | 365.6868  |
| Frequencies -- | 447.6155  |   | 468.8739  |           | 491.1726  |
| Frequencies -- | 584.2631  |   | 726.2253  |           | 770.0856  |
| Frequencies -- | 787.4620  |   | 847.8675  |           | 861.2585  |
| Frequencies -- | 930.4261  |   | 961.8039  |           | 993.1874  |
| Frequencies -- | 1024.3212 |   | 1072.0825 |           | 1326.0816 |
| Frequencies -- | 1332.2698 |   | 1417.6698 |           | 1466.9057 |
| Frequencies -- | 1514.5512 |   | 1641.4916 |           | 1652.0266 |
| Frequencies -- | 1708.7184 |   | 3176.6255 |           | 3194.4279 |
| Frequencies -- | 3202.1493 |   | 3269.6624 |           | 3301.6066 |
| Frequencies -- | 3491.2443 |   | 3757.6946 |           | 3888.1530 |



*syn-cis...H<sub>2</sub>O = VHP...H<sub>2</sub>O; spectator*

Geometry a

Relative energy = 14.55 kcal mol<sup>-1</sup>

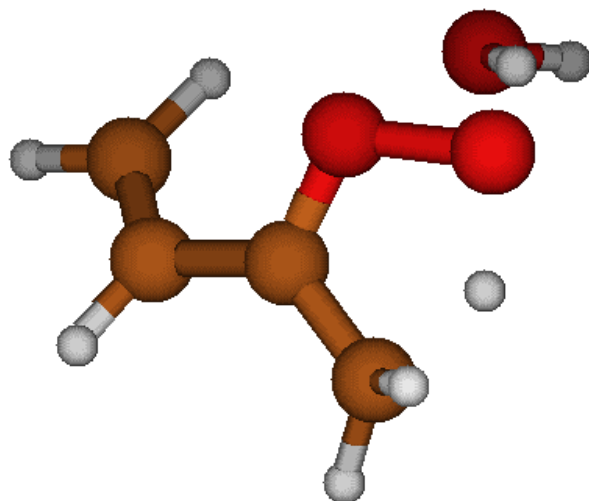

|                |            |   |           |           |           |
|----------------|------------|---|-----------|-----------|-----------|
| 1              | 6          | 0 | 1.481827  | 1.696796  | -0.147649 |
| 2              | 6          | 0 | 1.772232  | 0.402019  | 0.009845  |
| 3              | 6          | 0 | 0.733772  | -0.616735 | -0.054147 |
| 4              | 6          | 0 | 0.531846  | -1.726875 | 0.780324  |
| 5              | 8          | 0 | -0.266886 | -0.315440 | -0.848219 |
| 6              | 8          | 0 | -1.386619 | -1.136105 | -0.532343 |
| 7              | 1          | 0 | 0.462749  | 2.019973  | -0.307175 |
| 8              | 1          | 0 | 2.255553  | 2.447226  | -0.081055 |
| 9              | 1          | 0 | 2.772513  | 0.066408  | 0.242049  |
| 10             | 1          | 0 | -0.778427 | -1.492734 | 0.614598  |
| 11             | 1          | 0 | 0.343642  | -2.676351 | 0.284534  |
| 12             | 1          | 0 | 1.163902  | -1.795617 | 1.653138  |
| 13             | 1          | 0 | -2.065358 | 0.648193  | 0.105604  |
| 14             | 8          | 0 | -1.926631 | 1.528585  | 0.484657  |
| 15             | 1          | 0 | -2.631556 | 1.635354  | 1.125310  |
| Frequencies -- | -1610.8587 |   | 41.6251   |           | 64.9473   |
| Frequencies -- | 80.8787    |   | 125.8768  |           | 171.5352  |
| Frequencies -- | 219.9222   |   | 290.8253  |           | 386.6796  |
| Frequencies -- | 446.8301   |   | 533.1061  |           | 562.0907  |
| Frequencies -- | 589.2097   |   | 623.2465  |           | 718.0198  |
| Frequencies -- | 744.7442   |   | 901.7159  |           | 923.5264  |
| Frequencies -- | 940.6928   |   | 1018.8397 |           | 1033.3920 |
| Frequencies -- | 1042.0176  |   | 1090.4185 |           | 1313.9961 |
| Frequencies -- | 1336.1702  |   | 1363.2248 |           | 1440.9053 |
| Frequencies -- | 1479.2665  |   | 1541.4499 |           | 1674.8181 |
| Frequencies -- | 1679.5495  |   | 1830.4941 |           | 3112.2610 |
| Frequencies -- | 3166.9518  |   | 3207.1640 |           | 3225.1584 |
| Frequencies -- | 3267.7036  |   | 3697.4471 |           | 3906.9090 |

Geometry b

Relative energy = 13.89 kcal mol<sup>-1</sup>

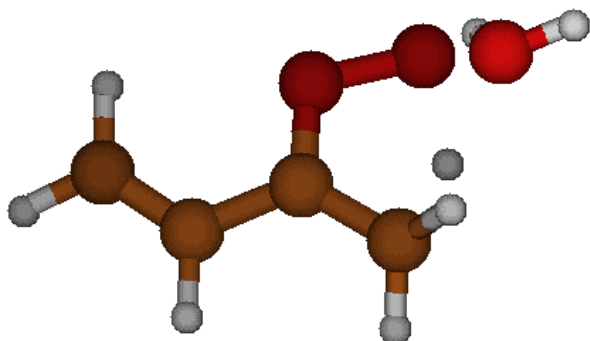

|                |            |   |           |           |           |
|----------------|------------|---|-----------|-----------|-----------|
| 1              | 6          | 0 | 2.772155  | -0.460193 | 0.613818  |
| 2              | 6          | 0 | 1.966132  | 0.529855  | 0.222269  |
| 3              | 6          | 0 | 0.577018  | 0.345171  | -0.163675 |
| 4              | 6          | 0 | -0.329191 | 1.323088  | -0.596079 |
| 5              | 8          | 0 | 0.176292  | -0.902418 | -0.289602 |
| 6              | 8          | 0 | -1.100778 | -0.917670 | -0.909354 |
| 7              | 1          | 0 | 2.431957  | -1.484393 | 0.646766  |
| 8              | 1          | 0 | 3.786587  | -0.257057 | 0.920391  |
| 9              | 1          | 0 | 2.309364  | 1.554140  | 0.213001  |
| 10             | 1          | 0 | -0.912610 | 0.351812  | -1.315616 |
| 11             | 1          | 0 | -1.281541 | 1.365195  | -0.066026 |
| 12             | 1          | 0 | 0.091547  | 2.289866  | -0.832257 |
| 13             | 1          | 0 | -2.365642 | -0.466964 | 0.419279  |
| 14             | 8          | 0 | -2.851098 | 0.096167  | 1.044819  |
| 15             | 1          | 0 | -3.771672 | 0.011248  | 0.789565  |
| Frequencies -- | -1615.0701 |   | 34.2583   |           | 79.7759   |
| Frequencies -- | 111.3066   |   | 150.1824  |           | 176.3081  |
| Frequencies -- | 235.5029   |   | 283.6266  |           | 394.4130  |
| Frequencies -- | 483.2131   |   | 498.3378  |           | 577.4891  |
| Frequencies -- | 637.2685   |   | 651.5047  |           | 736.1667  |
| Frequencies -- | 769.1469   |   | 909.4509  |           | 940.7370  |
| Frequencies -- | 957.1199   |   | 997.3684  |           | 1025.3350 |
| Frequencies -- | 1041.8259  |   | 1084.7334 |           | 1314.4620 |
| Frequencies -- | 1333.1704  |   | 1367.8817 |           | 1436.6193 |
| Frequencies -- | 1486.2579  |   | 1546.8586 |           | 1679.9654 |
| Frequencies -- | 1687.5295  |   | 1821.0748 |           | 3072.6479 |
| Frequencies -- | 3178.0501  |   | 3208.6378 |           | 3215.1417 |
| Frequencies -- | 3272.6954  |   | 3629.8532 |           | 3896.5430 |

**VHP,cis...H<sub>2</sub>O**

Geometry a

Relative energy = -16.15 kcal mol<sup>-1</sup>

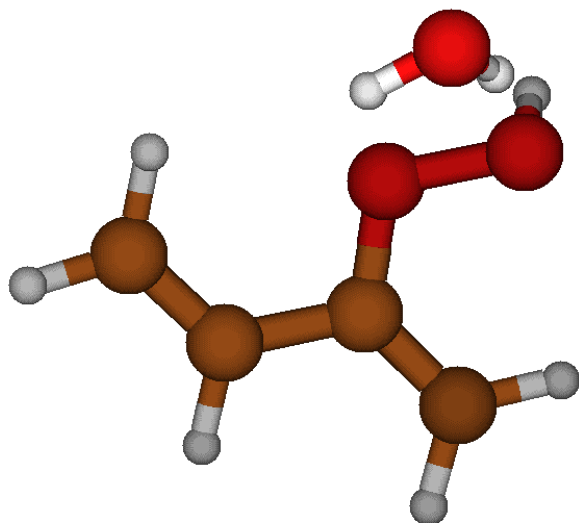

|                |           |   |           |           |           |
|----------------|-----------|---|-----------|-----------|-----------|
| 1              | 6         | 0 | 1.775810  | 1.719398  | 0.301535  |
| 2              | 6         | 0 | 1.849955  | 0.496614  | -0.226932 |
| 3              | 6         | 0 | 0.830123  | -0.541268 | -0.112105 |
| 4              | 6         | 0 | 0.916426  | -1.742261 | -0.687561 |
| 5              | 8         | 0 | -0.223824 | -0.099598 | 0.659119  |
| 6              | 8         | 0 | -1.278757 | -1.089266 | 0.689024  |
| 7              | 1         | 0 | 0.921706  | 2.041230  | 0.877213  |
| 8              | 1         | 0 | 2.579476  | 2.425974  | 0.162881  |
| 9              | 1         | 0 | 2.717649  | 0.201281  | -0.800444 |
| 10             | 1         | 0 | -1.340187 | -1.228984 | 1.643507  |
| 11             | 1         | 0 | 0.140398  | -2.480303 | -0.599503 |
| 12             | 1         | 0 | 1.793486  | -1.967153 | -1.271073 |
| 13             | 1         | 0 | -2.524862 | 0.310280  | -0.253041 |
| 14             | 8         | 0 | -2.813695 | 1.127254  | -0.670816 |
| 15             | 1         | 0 | -1.991346 | 1.595661  | -0.827778 |
| Frequencies -- | 9.2016    |   | 26.6217   |           | 97.4239   |
| Frequencies -- | 126.0226  |   | 136.5129  |           | 160.0549  |
| Frequencies -- | 182.5184  |   | 232.5979  |           | 255.4877  |
| Frequencies -- | 360.1208  |   | 429.5917  |           | 450.1572  |
| Frequencies -- | 489.3924  |   | 578.6185  |           | 729.2227  |
| Frequencies -- | 765.8449  |   | 851.5971  |           | 863.4689  |
| Frequencies -- | 923.6757  |   | 956.6147  |           | 979.0578  |
| Frequencies -- | 1023.6906 |   | 1069.1968 |           | 1319.2068 |
| Frequencies -- | 1327.6300 |   | 1379.4509 |           | 1426.2499 |
| Frequencies -- | 1470.6070 |   | 1653.8693 |           | 1674.2874 |
| Frequencies -- | 1718.7794 |   | 3177.9083 |           | 3197.5566 |
| Frequencies -- | 3208.8633 |   | 3269.0984 |           | 3310.8547 |
| Frequencies -- | 3778.6400 |   | 3813.3351 |           | 3915.1257 |

Geometry b

Relative energy = 16.07 kcal mol<sup>-1</sup>

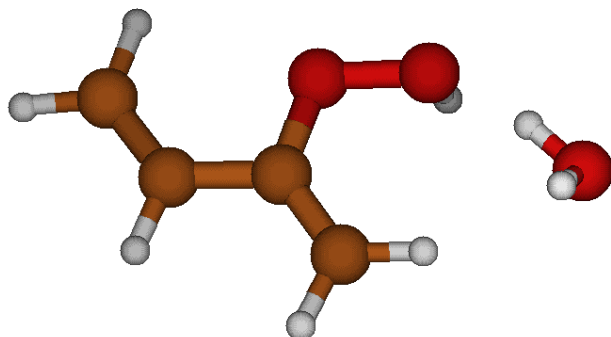

|                |           |   |           |           |           |
|----------------|-----------|---|-----------|-----------|-----------|
| 1              | 6         | 0 | -2.972277 | -0.290171 | -0.372847 |
| 2              | 6         | 0 | -2.055182 | 0.635098  | -0.086673 |
| 3              | 6         | 0 | -0.636063 | 0.381440  | 0.147514  |
| 4              | 6         | 0 | 0.254566  | 1.339591  | 0.419638  |
| 5              | 8         | 0 | -0.364014 | -0.968085 | 0.057762  |
| 6              | 8         | 0 | 1.030535  | -1.245275 | 0.265897  |
| 7              | 1         | 0 | -2.720133 | -1.335983 | -0.454635 |
| 8              | 1         | 0 | -4.001668 | -0.009159 | -0.534025 |
| 9              | 1         | 0 | -2.335247 | 1.676922  | -0.013598 |
| 10             | 1         | 0 | 1.069701  | -1.327877 | 1.229880  |
| 11             | 1         | 0 | 1.303531  | 1.151305  | 0.566346  |
| 12             | 1         | 0 | -0.100017 | 2.355969  | 0.469892  |
| 13             | 1         | 0 | 2.684342  | -0.271024 | -0.457974 |
| 14             | 8         | 0 | 3.471506  | 0.276853  | -0.364030 |
| 15             | 1         | 0 | 3.449001  | 0.856157  | -1.128717 |
| Frequencies -- | 26.3764   |   | 80.2553   |           | 93.4152   |
| Frequencies -- | 120.3937  |   | 152.5259  |           | 181.4691  |
| Frequencies -- | 192.0226  |   | 241.8137  |           | 298.0946  |
| Frequencies -- | 363.9711  |   | 439.4282  |           | 465.5648  |
| Frequencies -- | 500.1938  |   | 581.9594  |           | 735.3764  |
| Frequencies -- | 774.9849  |   | 856.1208  |           | 881.4772  |
| Frequencies -- | 929.2280  |   | 958.1029  |           | 988.1722  |
| Frequencies -- | 1022.7305 |   | 1069.5849 |           | 1317.6924 |
| Frequencies -- | 1328.8220 |   | 1389.0893 |           | 1432.1536 |
| Frequencies -- | 1475.3027 |   | 1652.1241 |           | 1667.0065 |
| Frequencies -- | 1715.4983 |   | 3178.0457 |           | 3195.6407 |
| Frequencies -- | 3201.0007 |   | 3270.1964 |           | 3298.2980 |
| Frequencies -- | 3744.2286 |   | 3783.1508 |           | 3907.6372 |

**anti,trans...H<sub>2</sub>O**

Relative energy = -3.96 kcal mol<sup>-1</sup>

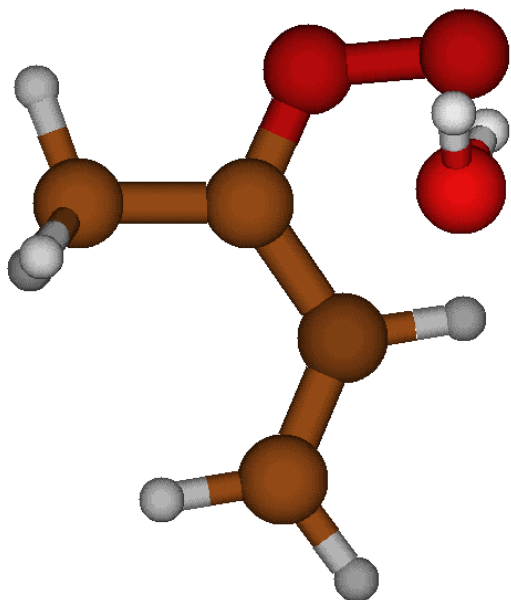

|                |           |   |           |           |           |
|----------------|-----------|---|-----------|-----------|-----------|
| 1              | 6         | 0 | 0.502759  | -0.530908 | -0.040525 |
| 2              | 8         | 0 | -0.557746 | -1.204586 | -0.283864 |
| 3              | 8         | 0 | -1.565217 | -0.632306 | -1.026483 |
| 4              | 8         | 0 | -1.865696 | 1.189809  | 1.000324  |
| 5              | 1         | 0 | -2.511715 | 0.878462  | 1.636905  |
| 6              | 1         | 0 | -1.986430 | 0.602401  | 0.228125  |
| 7              | 6         | 0 | 0.700039  | 0.779689  | -0.598049 |
| 8              | 6         | 0 | 1.794721  | 1.506221  | -0.344643 |
| 9              | 1         | 0 | -0.092263 | 1.135874  | -1.235209 |
| 10             | 1         | 0 | 2.582188  | 1.158439  | 0.308080  |
| 11             | 1         | 0 | 1.919171  | 2.484508  | -0.782971 |
| 12             | 6         | 0 | 1.475764  | -1.233265 | 0.838470  |
| 13             | 1         | 0 | 1.115678  | -2.233429 | 1.057719  |
| 14             | 1         | 0 | 1.589922  | -0.684234 | 1.773165  |
| 15             | 1         | 0 | 2.453023  | -1.295780 | 0.362849  |
| Frequencies -- | 49.4309   |   | 69.1601   |           | 126.9246  |
| Frequencies -- | 146.2738  |   | 162.4503  |           | 214.7714  |
| Frequencies -- | 256.1720  |   | 308.5324  |           | 331.6080  |
| Frequencies -- | 384.0414  |   | 405.0895  |           | 477.3556  |
| Frequencies -- | 627.8561  |   | 722.8786  |           | 774.4368  |
| Frequencies -- | 801.5273  |   | 934.0422  |           | 996.6085  |
| Frequencies -- | 1001.7754 |   | 1049.3132 |           | 1057.4421 |
| Frequencies -- | 1067.1525 |   | 1292.0431 |           | 1371.3492 |
| Frequencies -- | 1430.2155 |   | 1434.0662 |           | 1470.9814 |
| Frequencies -- | 1487.5212 |   | 1524.1467 |           | 1668.2012 |
| Frequencies -- | 1678.2292 |   | 3063.0967 |           | 3126.1236 |
| Frequencies -- | 3169.8606 |   | 3174.5228 |           | 3246.6946 |
| Frequencies -- | 3267.5276 |   | 3506.6328 |           | 3891.2774 |

**anti,cis...H<sub>2</sub>O**

Relative energy = -2.88 kcal mol<sup>-1</sup>

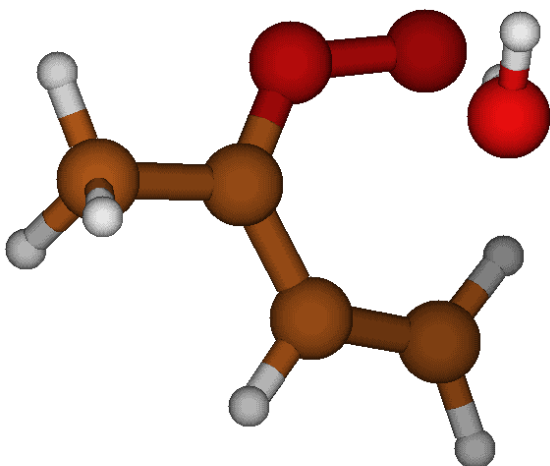

|                |           |   |           |           |           |
|----------------|-----------|---|-----------|-----------|-----------|
| 1              | 6         | 0 | 0.492942  | 2.001152  | 0.040826  |
| 2              | 6         | 0 | -0.555963 | 1.257901  | -0.353437 |
| 3              | 6         | 0 | -0.897727 | -0.073605 | 0.057168  |
| 4              | 8         | 0 | -0.244460 | -0.812669 | 0.871531  |
| 5              | 8         | 0 | 0.953912  | -0.371673 | 1.382346  |
| 6              | 6         | 0 | -2.127248 | -0.729000 | -0.473605 |
| 7              | 8         | 0 | 1.935971  | -0.814562 | -1.201091 |
| 8              | 1         | 0 | 0.599021  | 3.003775  | -0.349259 |
| 9              | 1         | 0 | 1.218535  | 1.617969  | 0.733413  |
| 10             | 1         | 0 | -1.260002 | 1.679944  | -1.058260 |
| 11             | 1         | 0 | -2.017349 | -0.882065 | -1.547889 |
| 12             | 1         | 0 | -2.284155 | -1.688865 | 0.007583  |
| 13             | 1         | 0 | -2.997395 | -0.093158 | -0.316379 |
| 14             | 1         | 0 | 1.824254  | -0.679011 | -0.243089 |
| 15             | 1         | 0 | 2.281685  | -1.706045 | -1.274127 |
| Frequencies -- | 44.1500   |   | 66.0818   |           | 125.6064  |
| Frequencies -- | 142.2799  |   | 172.8292  |           | 194.7427  |
| Frequencies -- | 300.0454  |   | 312.1421  |           | 329.9431  |
| Frequencies -- | 368.6155  |   | 383.4176  |           | 413.4903  |
| Frequencies -- | 634.2084  |   | 715.9449  |           | 734.7861  |
| Frequencies -- | 818.1382  |   | 954.3371  |           | 1025.9549 |
| Frequencies -- | 1032.6593 |   | 1033.4561 |           | 1054.7801 |
| Frequencies -- | 1105.5990 |   | 1269.0253 |           | 1346.9081 |
| Frequencies -- | 1416.0047 |   | 1459.6556 |           | 1469.2495 |
| Frequencies -- | 1487.1046 |   | 1523.6652 |           | 1651.8002 |
| Frequencies -- | 1674.5818 |   | 3058.5127 |           | 3120.1840 |
| Frequencies -- | 3171.6983 |   | 3173.7647 |           | 3189.4565 |
| Frequencies -- | 3316.6378 |   | 3580.4946 |           | 3892.2086 |

*anti,trans...H<sub>2</sub>O=anti,cis...H<sub>2</sub>O*

Geometry a

Relative energy = 2.97 kcal mol<sup>-1</sup>

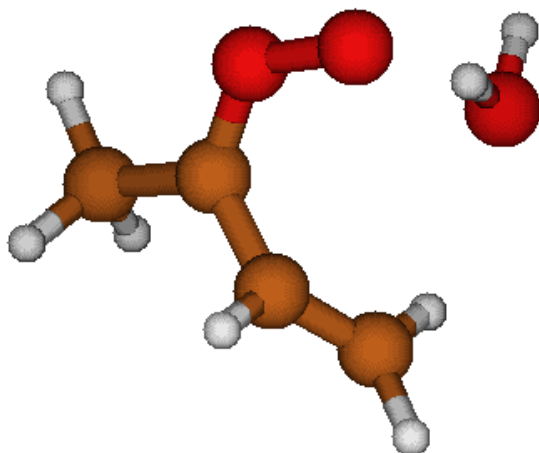

|                |           |   |           |           |           |
|----------------|-----------|---|-----------|-----------|-----------|
| 1              | 6         | 0 | 0.163221  | 2.016779  | -0.114447 |
| 2              | 6         | 0 | -0.689443 | 1.124935  | -0.605383 |
| 3              | 6         | 0 | -0.900523 | -0.212897 | -0.035092 |
| 4              | 6         | 0 | -2.008865 | -0.487804 | 0.913438  |
| 5              | 8         | 0 | -0.193875 | -1.214919 | -0.349240 |
| 6              | 8         | 0 | 0.877192  | -1.034809 | -1.200961 |
| 7              | 1         | 0 | 0.825506  | 1.772397  | 0.702310  |
| 8              | 1         | 0 | 0.233200  | 2.998417  | -0.558249 |
| 9              | 1         | 0 | -1.329943 | 1.360660  | -1.448599 |
| 10             | 1         | 0 | -2.079190 | -1.549448 | 1.130802  |
| 11             | 1         | 0 | -2.950775 | -0.126122 | 0.500633  |
| 12             | 1         | 0 | -1.829912 | 0.066755  | 1.835683  |
| 13             | 1         | 0 | 1.937399  | -0.377786 | 0.106745  |
| 14             | 8         | 0 | 2.213454  | -0.006541 | 0.969978  |
| 15             | 1         | 0 | 2.633215  | -0.740795 | 1.421361  |
| Frequencies -- | -156.8769 |   | 59.6181   |           | 126.7416  |
| Frequencies -- | 160.2462  |   | 173.7484  |           | 202.2182  |
| Frequencies -- | 235.2546  |   | 250.6306  |           | 313.5951  |
| Frequencies -- | 337.1840  |   | 403.4059  |           | 523.8421  |
| Frequencies -- | 614.4239  |   | 691.8397  |           | 795.5026  |
| Frequencies -- | 808.5329  |   | 918.1595  |           | 992.5158  |
| Frequencies -- | 1007.9969 |   | 1015.3548 |           | 1032.6755 |
| Frequencies -- | 1108.1189 |   | 1284.3942 |           | 1330.6004 |
| Frequencies -- | 1413.4804 |   | 1454.1093 |           | 1475.9875 |
| Frequencies -- | 1478.2113 |   | 1543.2840 |           | 1677.6597 |
| Frequencies -- | 1693.6016 |   | 3053.8027 |           | 3113.1901 |
| Frequencies -- | 3153.9258 |   | 3165.7002 |           | 3173.2901 |
| Frequencies -- | 3271.0651 |   | 3481.9512 |           | 3895.7840 |

Geometry b

Relative energy = 3.19 kcal mol<sup>-1</sup>

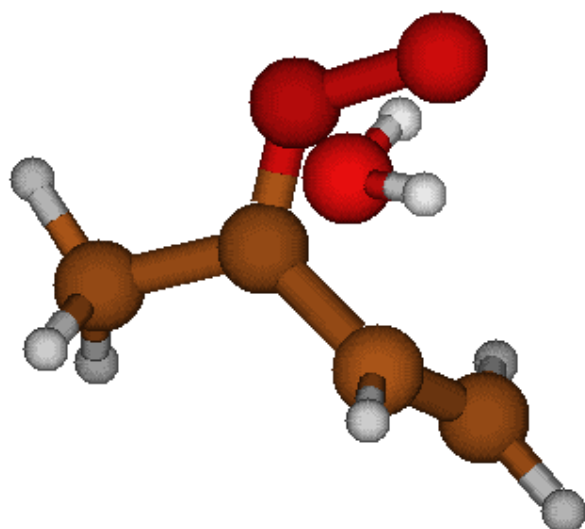

|                |           |   |           |           |           |
|----------------|-----------|---|-----------|-----------|-----------|
| 1              | 6         | 0 | -1.410208 | 1.824285  | 0.014094  |
| 2              | 6         | 0 | -0.693551 | 0.865838  | -0.560421 |
| 3              | 6         | 0 | -0.578340 | -0.483883 | 0.008063  |
| 4              | 6         | 0 | -1.368265 | -1.621415 | -0.524574 |
| 5              | 8         | 0 | 0.213131  | -0.766137 | 0.955263  |
| 6              | 8         | 0 | 1.055931  | 0.214863  | 1.439151  |
| 7              | 1         | 0 | -1.902529 | 1.675364  | 0.963950  |
| 8              | 1         | 0 | -1.506085 | 2.794108  | -0.449499 |
| 9              | 1         | 0 | -0.171534 | 1.012741  | -1.496436 |
| 10             | 1         | 0 | -1.148627 | -2.533229 | 0.022531  |
| 11             | 1         | 0 | -1.119236 | -1.759756 | -1.578106 |
| 12             | 1         | 0 | -2.432566 | -1.393692 | -0.471263 |
| 13             | 1         | 0 | 2.024410  | 0.185169  | -0.096554 |
| 14             | 8         | 0 | 2.199222  | 0.025285  | -1.046860 |
| 15             | 1         | 0 | 2.812077  | 0.718254  | -1.298023 |
| Frequencies -- | -157.0894 |   | 48.1979   |           | 101.8422  |
| Frequencies -- | 137.8273  |   | 152.8159  |           | 203.6406  |
| Frequencies -- | 227.3128  |   | 257.8037  |           | 312.0105  |
| Frequencies -- | 328.9664  |   | 470.3643  |           | 523.4228  |
| Frequencies -- | 611.3910  |   | 693.7141  |           | 709.0625  |
| Frequencies -- | 799.9243  |   | 911.9615  |           | 975.0008  |
| Frequencies -- | 995.6496  |   | 1004.6362 |           | 1031.9230 |
| Frequencies -- | 1103.8764 |   | 1277.8132 |           | 1323.6416 |
| Frequencies -- | 1412.9140 |   | 1453.4750 |           | 1472.9391 |
| Frequencies -- | 1478.6440 |   | 1544.1414 |           | 1695.4714 |
| Frequencies -- | 1705.4387 |   | 3053.5222 |           | 3114.0954 |
| Frequencies -- | 3167.5622 |   | 3170.9889 |           | 3194.4822 |
| Frequencies -- | 3262.6214 |   | 3479.4929 |           | 3896.9657 |



**anti,trans...H<sub>2</sub>O=VHPOH**

Geometry a

Relative energy = 9.50 kcal mol<sup>-1</sup>

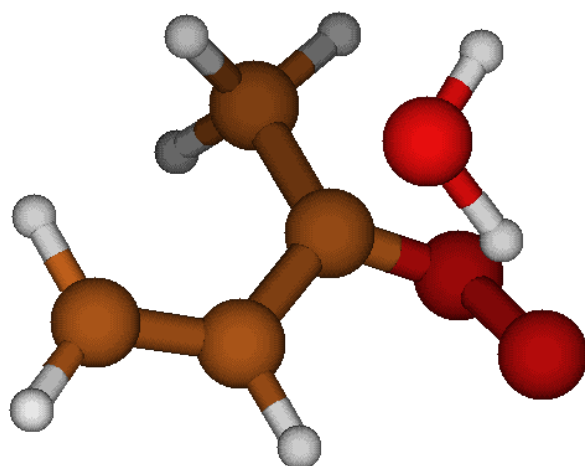

|                |           |   |           |           |           |
|----------------|-----------|---|-----------|-----------|-----------|
| 1              | 6         | 0 | -0.060964 | 0.348874  | -0.257893 |
| 2              | 8         | 0 | 1.104144  | 0.322443  | -0.845143 |
| 3              | 8         | 0 | 1.775310  | -0.892980 | -0.423839 |
| 4              | 8         | 0 | 0.701112  | -0.040932 | 1.549924  |
| 5              | 1         | 0 | 1.208043  | 0.740233  | 1.802977  |
| 6              | 1         | 0 | 1.368332  | -0.593706 | 0.837969  |
| 7              | 6         | 0 | -0.899577 | -0.853879 | -0.285482 |
| 8              | 6         | 0 | -2.189293 | -0.857695 | 0.045887  |
| 9              | 1         | 0 | -0.392214 | -1.739157 | -0.634649 |
| 10             | 1         | 0 | -2.693912 | 0.016126  | 0.430868  |
| 11             | 1         | 0 | -2.777556 | -1.757576 | -0.050120 |
| 12             | 6         | 0 | -0.666046 | 1.711249  | -0.188051 |
| 13             | 1         | 0 | 0.116882  | 2.462255  | -0.155407 |
| 14             | 1         | 0 | -1.288423 | 1.792242  | 0.698268  |
| 15             | 1         | 0 | -1.290405 | 1.880042  | -1.064208 |
| Frequencies -- | -766.0672 |   | 76.9871   |           | 154.3111  |
| Frequencies -- | 185.7923  |   | 276.3150  |           | 292.3097  |
| Frequencies -- | 330.0388  |   | 404.9399  |           | 460.2178  |
| Frequencies -- | 480.1778  |   | 598.7133  |           | 611.1162  |
| Frequencies -- | 681.3080  |   | 716.3455  |           | 774.2926  |
| Frequencies -- | 885.5082  |   | 950.6225  |           | 985.5434  |
| Frequencies -- | 998.1127  |   | 1043.4725 |           | 1068.2890 |
| Frequencies -- | 1115.4939 |   | 1293.4962 |           | 1340.9066 |
| Frequencies -- | 1421.3128 |   | 1422.1262 |           | 1464.1920 |
| Frequencies -- | 1497.9532 |   | 1518.3014 |           | 1609.4665 |
| Frequencies -- | 1689.0270 |   | 1812.3004 |           | 3076.5471 |
| Frequencies -- | 3151.2677 |   | 3174.0378 |           | 3177.1669 |
| Frequencies -- | 3234.2172 |   | 3262.9730 |           | 3800.2828 |

Geometry b

Relative energy = 8.81 kcal mol<sup>-1</sup>

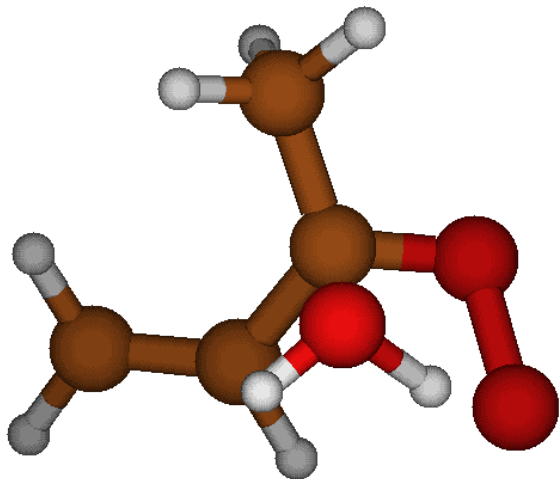

|                |           |   |           |           |           |
|----------------|-----------|---|-----------|-----------|-----------|
| 1              | 6         | 0 | -0.049109 | 0.377978  | -0.240168 |
| 2              | 8         | 0 | 1.126947  | 0.388183  | -0.798726 |
| 3              | 8         | 0 | 1.792912  | -0.850010 | -0.447411 |
| 4              | 8         | 0 | 0.733872  | -0.038785 | 1.548430  |
| 5              | 1         | 0 | 0.176333  | -0.704826 | 1.963800  |
| 6              | 1         | 0 | 1.395115  | -0.584810 | 0.834292  |
| 7              | 6         | 0 | -0.883864 | -0.824049 | -0.364886 |
| 8              | 6         | 0 | -2.178242 | -0.861621 | -0.047807 |
| 9              | 1         | 0 | -0.366155 | -1.676843 | -0.776161 |
| 10             | 1         | 0 | -2.695046 | -0.018084 | 0.386214  |
| 11             | 1         | 0 | -2.758985 | -1.755870 | -0.216151 |
| 12             | 6         | 0 | -0.651197 | 1.732970  | -0.089070 |
| 13             | 1         | 0 | 0.135311  | 2.461576  | 0.073332  |
| 14             | 1         | 0 | -1.331641 | 1.744906  | 0.756808  |
| 15             | 1         | 0 | -1.210309 | 1.987181  | -0.988886 |
| Frequencies -- | -745.1645 |   | 98.5291   |           | 128.3402  |
| Frequencies -- | 194.7012  |   | 274.9690  |           | 290.1252  |
| Frequencies -- | 329.9074  |   | 410.0732  |           | 459.4679  |
| Frequencies -- | 470.8369  |   | 595.8293  |           | 641.6124  |
| Frequencies -- | 694.0950  |   | 719.1753  |           | 783.4741  |
| Frequencies -- | 891.0935  |   | 957.4582  |           | 983.9842  |
| Frequencies -- | 1001.3301 |   | 1046.8400 |           | 1070.7165 |
| Frequencies -- | 1104.6322 |   | 1290.1523 |           | 1336.0323 |
| Frequencies -- | 1419.1908 |   | 1426.2368 |           | 1460.3318 |
| Frequencies -- | 1495.2773 |   | 1507.5237 |           | 1542.5180 |
| Frequencies -- | 1683.1166 |   | 1875.6883 |           | 3076.8297 |
| Frequencies -- | 3154.3186 |   | 3172.1687 |           | 3186.0913 |
| Frequencies -- | 3227.7811 |   | 3260.6458 |           | 3832.2368 |

**VHPOH**

Geometry a

Relative energy = -26.38 kcal mol<sup>-1</sup>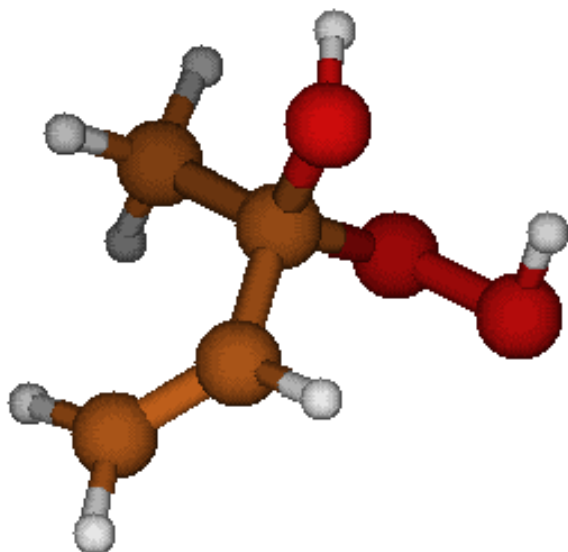

|                |           |   |           |           |           |
|----------------|-----------|---|-----------|-----------|-----------|
| 1              | 6         | 0 | 0.001754  | 0.347355  | 0.079629  |
| 2              | 8         | 0 | 1.051787  | 0.024753  | -0.839713 |
| 3              | 8         | 0 | 1.782266  | -1.118200 | -0.334030 |
| 4              | 8         | 0 | 0.574729  | 0.682899  | 1.333042  |
| 5              | 1         | 0 | 0.996464  | 1.544131  | 1.240056  |
| 6              | 1         | 0 | 2.202669  | -0.729864 | 0.447526  |
| 7              | 6         | 0 | -0.887106 | -0.836140 | 0.342141  |
| 8              | 6         | 0 | -2.147870 | -0.951168 | -0.054476 |
| 9              | 1         | 0 | -0.412260 | -1.633597 | 0.893732  |
| 10             | 1         | 0 | -2.656790 | -0.177400 | -0.609821 |
| 11             | 1         | 0 | -2.715262 | -1.842351 | 0.168318  |
| 12             | 6         | 0 | -0.668586 | 1.541389  | -0.571433 |
| 13             | 1         | 0 | 0.066826  | 2.331241  | -0.717579 |
| 14             | 1         | 0 | -1.464649 | 1.907590  | 0.070566  |
| 15             | 1         | 0 | -1.076413 | 1.276020  | -1.542358 |
| Frequencies -- | 58.8681   |   | 156.1299  |           | 239.5871  |
| Frequencies -- | 248.4048  |   | 288.6436  |           | 295.5697  |
| Frequencies -- | 365.4981  |   | 388.6557  |           | 404.7531  |
| Frequencies -- | 454.2048  |   | 497.3250  |           | 628.5350  |
| Frequencies -- | 723.2871  |   | 762.0343  |           | 870.0899  |
| Frequencies -- | 945.1639  |   | 953.4268  |           | 970.2892  |
| Frequencies -- | 1032.0665 |   | 1039.5753 |           | 1130.1690 |
| Frequencies -- | 1150.7350 |   | 1218.8760 |           | 1336.6346 |
| Frequencies -- | 1394.7020 |   | 1406.2260 |           | 1426.3282 |
| Frequencies -- | 1467.5029 |   | 1498.6449 |           | 1519.3882 |
| Frequencies -- | 1714.0146 |   | 3071.3160 |           | 3146.1692 |
| Frequencies -- | 3169.5006 |   | 3171.8245 |           | 3215.1879 |
| Frequencies -- | 3255.8783 |   | 3730.8872 |           | 3803.7581 |

Geometry b

Relative energy = -28.54 kcal mol<sup>-1</sup>

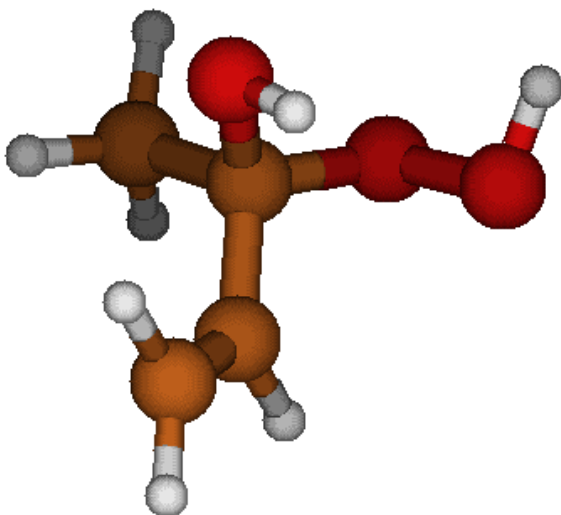

|                |           |   |           |           |           |
|----------------|-----------|---|-----------|-----------|-----------|
| 1              | 6         | 0 | 0.032573  | 0.409777  | 0.025494  |
| 2              | 8         | 0 | 1.329446  | 0.066005  | -0.483071 |
| 3              | 8         | 0 | 1.574135  | -1.323887 | -0.127835 |
| 4              | 8         | 0 | -0.003684 | 0.310457  | 1.420449  |
| 5              | 1         | 0 | -0.024930 | -0.630092 | 1.629284  |
| 6              | 1         | 0 | 2.277763  | -1.198049 | 0.521191  |
| 7              | 6         | 0 | -1.009151 | -0.448695 | -0.646571 |
| 8              | 6         | 0 | -2.101219 | -0.908592 | -0.048255 |
| 9              | 1         | 0 | -0.819681 | -0.653808 | -1.691858 |
| 10             | 1         | 0 | -2.305128 | -0.695446 | 0.991393  |
| 11             | 1         | 0 | -2.824483 | -1.502635 | -0.586370 |
| 12             | 6         | 0 | -0.103454 | 1.876792  | -0.341807 |
| 13             | 1         | 0 | 0.699993  | 2.439694  | 0.126850  |
| 14             | 1         | 0 | -1.060952 | 2.240390  | 0.019827  |
| 15             | 1         | 0 | -0.054246 | 2.003651  | -1.419824 |
| Frequencies -- | 93.2146   |   | 136.8482  |           | 197.3803  |
| Frequencies -- | 218.2526  |   | 254.2255  |           | 293.6399  |
| Frequencies -- | 311.3784  |   | 382.2208  |           | 458.2974  |
| Frequencies -- | 501.9114  |   | 533.1771  |           | 602.3731  |
| Frequencies -- | 716.4808  |   | 773.6692  |           | 876.0991  |
| Frequencies -- | 937.6960  |   | 968.8371  |           | 976.2985  |
| Frequencies -- | 1040.2922 |   | 1048.1515 |           | 1102.0556 |
| Frequencies -- | 1171.2961 |   | 1263.8172 |           | 1319.8772 |
| Frequencies -- | 1359.9256 |   | 1385.0481 |           | 1422.5130 |
| Frequencies -- | 1458.0122 |   | 1496.6490 |           | 1501.7827 |
| Frequencies -- | 1703.6625 |   | 3077.6217 |           | 3161.2562 |
| Frequencies -- | 3165.8904 |   | 3167.6871 |           | 3191.8615 |
| Frequencies -- | 3255.2450 |   | 3781.7822 |           | 3803.4998 |

*anti,trans...H<sub>2</sub>O=AHP...H<sub>2</sub>O*

Geometry a

Relative energy = 21.68 kcal mol<sup>-1</sup>

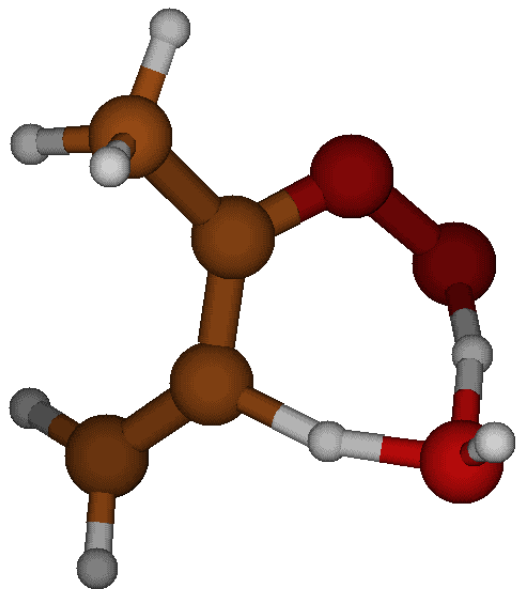

|                |            |   |           |           |           |
|----------------|------------|---|-----------|-----------|-----------|
| 1              | 6          | 0 | 0.303404  | 0.974816  | 0.038461  |
| 2              | 6          | 0 | 0.721753  | -0.363217 | 0.033286  |
| 3              | 8          | 0 | -0.051964 | -1.360414 | -0.260270 |
| 4              | 8          | 0 | -1.314260 | -1.032972 | -0.861754 |
| 5              | 1          | 0 | -0.901826 | 0.988992  | 0.565484  |
| 6              | 6          | 0 | 0.875077  | 2.033302  | -0.534223 |
| 7              | 6          | 0 | 2.036767  | -0.805764 | 0.580613  |
| 8              | 1          | 0 | 0.493652  | 3.029386  | -0.356569 |
| 9              | 1          | 0 | 1.691124  | 1.951182  | -1.244506 |
| 10             | 1          | 0 | -1.808729 | -0.332866 | -0.079944 |
| 11             | 8          | 0 | -2.124658 | 0.607173  | 0.704286  |
| 12             | 1          | 0 | -2.277368 | 0.299361  | 1.603439  |
| 13             | 1          | 0 | 2.141304  | -0.471189 | 1.610843  |
| 14             | 1          | 0 | 2.827595  | -0.324473 | 0.003950  |
| 15             | 1          | 0 | 2.139292  | -1.885511 | 0.530385  |
| Frequencies -- | -1617.1316 |   | 93.4341   |           | 117.5596  |
| Frequencies -- | 156.1532   |   | 209.3185  |           | 266.2491  |
| Frequencies -- | 295.0504   |   | 341.4218  |           | 469.3560  |
| Frequencies -- | 513.9825   |   | 543.1889  |           | 602.5271  |
| Frequencies -- | 638.5084   |   | 661.9232  |           | 752.1415  |
| Frequencies -- | 820.5784   |   | 912.6893  |           | 991.3215  |
| Frequencies -- | 1033.8029  |   | 1043.2842 |           | 1096.6395 |
| Frequencies -- | 1245.0686  |   | 1308.4410 |           | 1381.8822 |
| Frequencies -- | 1392.0930  |   | 1406.5819 |           | 1436.8604 |
| Frequencies -- | 1479.1749  |   | 1489.8744 |           | 1534.4171 |
| Frequencies -- | 1546.3747  |   | 1713.7599 |           | 1734.7203 |
| Frequencies -- | 3060.6175  |   | 3122.2553 |           | 3128.8256 |
| Frequencies -- | 3169.5414  |   | 3214.8391 |           | 3831.7935 |

Geometry b

Relative energy = 21.29 kcal mol<sup>-1</sup>

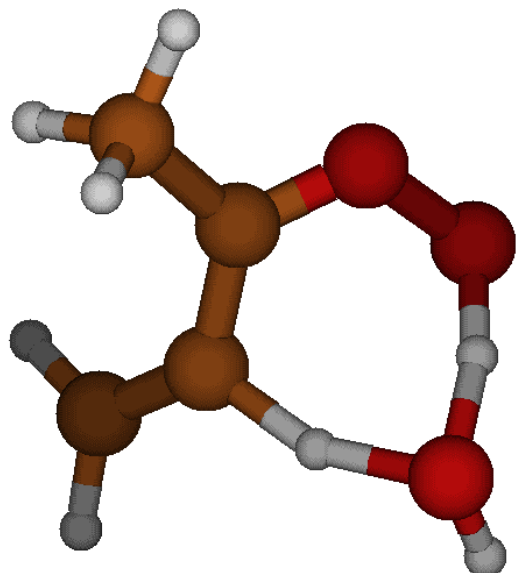

|                |            |   |           |           |           |
|----------------|------------|---|-----------|-----------|-----------|
| 1              | 6          | 0 | 0.283133  | 0.977742  | 0.030655  |
| 2              | 6          | 0 | 0.726868  | -0.353668 | 0.029436  |
| 3              | 8          | 0 | -0.024171 | -1.366579 | -0.265828 |
| 4              | 8          | 0 | -1.303151 | -1.062739 | -0.842170 |
| 5              | 1          | 0 | -0.905621 | 0.969589  | 0.580006  |
| 6              | 6          | 0 | 0.847140  | 2.039157  | -0.544843 |
| 7              | 6          | 0 | 2.048331  | -0.767424 | 0.581303  |
| 8              | 1          | 0 | 0.457560  | 3.033309  | -0.372753 |
| 9              | 1          | 0 | 1.668587  | 1.962416  | -1.249286 |
| 10             | 1          | 0 | -1.789679 | -0.384301 | -0.046939 |
| 11             | 8          | 0 | -2.078768 | 0.492468  | 0.839930  |
| 12             | 1          | 0 | -2.754779 | 1.084097  | 0.494161  |
| 13             | 1          | 0 | 2.124963  | -0.453197 | 1.620590  |
| 14             | 1          | 0 | 2.832246  | -0.249426 | 0.027996  |
| 15             | 1          | 0 | 2.182611  | -1.842534 | 0.511462  |
| Frequencies -- | -1579.1606 |   | 90.0409   |           | 123.4064  |
| Frequencies -- | 157.6379   |   | 209.5987  |           | 266.6685  |
| Frequencies -- | 294.7909   |   | 347.5860  |           | 455.0434  |
| Frequencies -- | 526.7034   |   | 567.4724  |           | 582.2499  |
| Frequencies -- | 634.0059   |   | 685.5202  |           | 746.8656  |
| Frequencies -- | 824.8423   |   | 914.8717  |           | 985.9504  |
| Frequencies -- | 1034.7025  |   | 1046.2654 |           | 1102.7353 |
| Frequencies -- | 1199.5851  |   | 1260.8384 |           | 1311.7191 |
| Frequencies -- | 1351.3159  |   | 1402.1852 |           | 1432.7856 |
| Frequencies -- | 1478.6880  |   | 1489.9102 |           | 1536.7907 |
| Frequencies -- | 1614.6585  |   | 1729.0537 |           | 1824.8393 |
| Frequencies -- | 3061.5159  |   | 3122.5845 |           | 3129.5143 |
| Frequencies -- | 3170.0530  |   | 3211.7163 |           | 3833.7874 |

**AHP...H<sub>2</sub>O**

Geometry a

Relative energy = -6.91 kcal mol<sup>-1</sup>

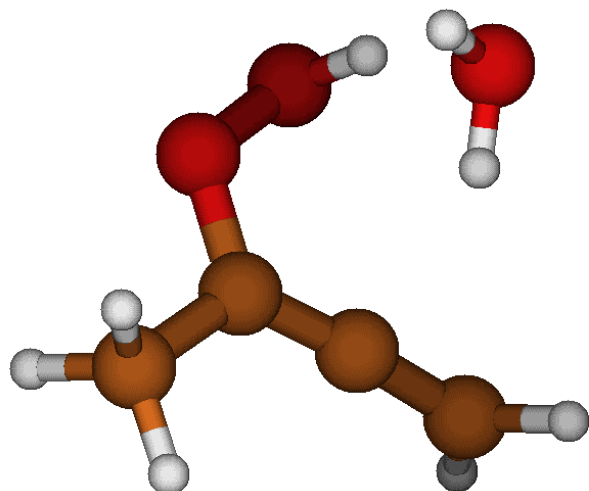

|                |           |   |           |           |           |
|----------------|-----------|---|-----------|-----------|-----------|
| 1              | 6         | 0 | -0.624401 | 1.015594  | 0.112446  |
| 2              | 6         | 0 | -0.838068 | -0.272220 | -0.011432 |
| 3              | 8         | 0 | -0.019619 | -1.265056 | 0.480104  |
| 4              | 8         | 0 | 1.016691  | -0.712630 | 1.318904  |
| 5              | 1         | 0 | 1.437880  | 0.546875  | -1.183862 |
| 6              | 6         | 0 | -0.516771 | 2.305151  | 0.284470  |
| 7              | 6         | 0 | -1.993133 | -0.889772 | -0.737307 |
| 8              | 1         | 0 | 0.025645  | 2.936970  | -0.408967 |
| 9              | 1         | 0 | -0.959780 | 2.797947  | 1.141972  |
| 10             | 1         | 0 | 1.673610  | -0.467461 | 0.634004  |
| 11             | 8         | 0 | 2.279214  | 0.105767  | -1.012504 |
| 12             | 1         | 0 | 2.290861  | -0.640922 | -1.617613 |
| 13             | 1         | 0 | -1.639204 | -1.544723 | -1.533165 |
| 14             | 1         | 0 | -2.620793 | -0.115184 | -1.166175 |
| 15             | 1         | 0 | -2.584264 | -1.490670 | -0.047285 |
| Frequencies -- | 51.8862   |   | 76.4725   |           | 146.2370  |
| Frequencies -- | 149.3252  |   | 156.9621  |           | 179.0429  |
| Frequencies -- | 223.6477  |   | 233.4389  |           | 283.4862  |
| Frequencies -- | 295.0367  |   | 426.1347  |           | 444.3698  |
| Frequencies -- | 477.3723  |   | 635.3040  |           | 654.5487  |
| Frequencies -- | 761.0903  |   | 778.5411  |           | 923.2105  |
| Frequencies -- | 930.7934  |   | 1012.9331 |           | 1041.7696 |
| Frequencies -- | 1072.9719 |   | 1207.7811 |           | 1335.0640 |
| Frequencies -- | 1416.8419 |   | 1485.5980 |           | 1493.4692 |
| Frequencies -- | 1510.8598 |   | 1523.8538 |           | 1646.0169 |
| Frequencies -- | 2049.9484 |   | 3058.6593 |           | 3119.6405 |
| Frequencies -- | 3121.2609 |   | 3166.0610 |           | 3190.6588 |
| Frequencies -- | 3517.0725 |   | 3762.6274 |           | 3890.1968 |

Geometry b

Relative energy = -6.61kcal mol<sup>-1</sup>

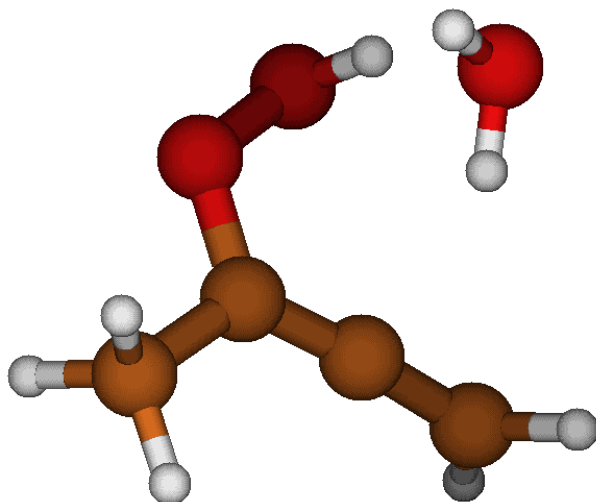

|                |           |   |           |           |           |
|----------------|-----------|---|-----------|-----------|-----------|
| 1              | 6         | 0 | 0.415322  | 1.067370  | -0.181275 |
| 2              | 6         | 0 | 0.898486  | -0.135078 | 0.022591  |
| 3              | 8         | 0 | 0.305726  | -1.310940 | -0.374304 |
| 4              | 8         | 0 | -0.848575 | -1.057362 | -1.201633 |
| 5              | 1         | 0 | -1.457498 | 0.286146  | 1.218656  |
| 6              | 6         | 0 | 0.043327  | 2.293374  | -0.433067 |
| 7              | 6         | 0 | 2.167949  | -0.438246 | 0.756979  |
| 8              | 1         | 0 | -0.601963 | 2.850620  | 0.236544  |
| 9              | 1         | 0 | 0.363287  | 2.807794  | -1.331718 |
| 10             | 1         | 0 | -1.524717 | -0.909587 | -0.508296 |
| 11             | 8         | 0 | -2.264835 | -0.213564 | 1.043798  |
| 12             | 1         | 0 | -2.922905 | 0.456118  | 0.838981  |
| 13             | 1         | 0 | 1.968488  | -1.088860 | 1.607745  |
| 14             | 1         | 0 | 2.623666  | 0.481615  | 1.109145  |
| 15             | 1         | 0 | 2.862612  | -0.953435 | 0.094687  |
| Frequencies -- | 50.1646   |   | 87.0192   |           | 142.9584  |
| Frequencies -- | 149.3477  |   | 158.7080  |           | 167.0358  |
| Frequencies -- | 223.7866  |   | 234.6360  |           | 288.6377  |
| Frequencies -- | 318.4374  |   | 418.3033  |           | 442.6383  |
| Frequencies -- | 477.3767  |   | 632.9827  |           | 654.9138  |
| Frequencies -- | 697.2521  |   | 778.8863  |           | 920.4341  |
| Frequencies -- | 929.4444  |   | 1014.8930 |           | 1042.0460 |
| Frequencies -- | 1073.3720 |   | 1210.0207 |           | 1335.2911 |
| Frequencies -- | 1416.6933 |   | 1485.7834 |           | 1493.5879 |
| Frequencies -- | 1523.2201 |   | 1533.2856 |           | 1650.6912 |
| Frequencies -- | 2048.0531 |   | 3060.5511 |           | 3116.9570 |
| Frequencies -- | 3122.8288 |   | 3166.5824 |           | 3185.3278 |
| Frequencies -- | 3525.1606 |   | 3761.1085 |           | 3891.0181 |



**anti,cis...H<sub>2</sub>O=VHPOH**

Geometry a

Relative energy = 10.86 kcal mol<sup>-1</sup>

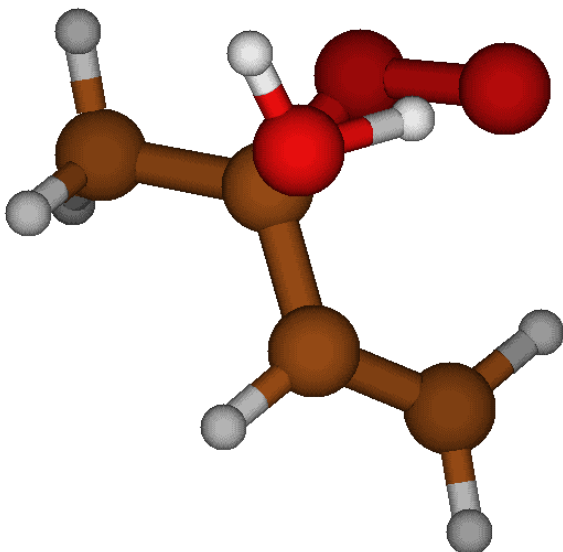

|                |           |   |           |           |           |
|----------------|-----------|---|-----------|-----------|-----------|
| 1              | 6         | 0 | -0.388508 | -0.350380 | -0.210752 |
| 2              | 8         | 0 | -0.311195 | 0.656681  | -1.023936 |
| 3              | 8         | 0 | 0.601097  | 1.645685  | -0.463307 |
| 4              | 8         | 0 | -0.678676 | 0.806967  | 1.410648  |
| 5              | 1         | 0 | -1.555363 | 1.198982  | 1.318992  |
| 6              | 1         | 0 | -0.027221 | 1.412091  | 0.748594  |
| 7              | 6         | 0 | 0.772650  | -1.023489 | 0.390931  |
| 8              | 6         | 0 | 2.037656  | -0.802011 | 0.040803  |
| 9              | 1         | 0 | 0.518239  | -1.797717 | 1.100519  |
| 10             | 1         | 0 | 2.291957  | -0.006970 | -0.641497 |
| 11             | 1         | 0 | 2.828880  | -1.412160 | 0.450715  |
| 12             | 6         | 0 | -1.621623 | -1.174340 | -0.395128 |
| 13             | 1         | 0 | -2.430924 | -0.569185 | -0.790990 |
| 14             | 1         | 0 | -1.908420 | -1.609399 | 0.558707  |
| 15             | 1         | 0 | -1.408009 | -1.988985 | -1.087403 |
| Frequencies -- | -674.5780 |   | 101.8342  |           | 148.5727  |
| Frequencies -- | 195.1035  |   | 268.4223  |           | 281.8501  |
| Frequencies -- | 314.7528  |   | 394.0978  |           | 396.6247  |
| Frequencies -- | 500.2505  |   | 605.5288  |           | 617.5990  |
| Frequencies -- | 664.3580  |   | 698.1845  |           | 791.3388  |
| Frequencies -- | 877.3650  |   | 990.8995  |           | 1009.3404 |
| Frequencies -- | 1018.1333 |   | 1021.4220 |           | 1089.3939 |
| Frequencies -- | 1159.3065 |   | 1250.3718 |           | 1344.9554 |
| Frequencies -- | 1409.2663 |   | 1451.0265 |           | 1465.6964 |
| Frequencies -- | 1493.0244 |   | 1536.3723 |           | 1609.0816 |
| Frequencies -- | 1689.2386 |   | 1824.0412 |           | 3068.0849 |
| Frequencies -- | 3141.3853 |   | 3174.9886 |           | 3176.1005 |
| Frequencies -- | 3203.7723 |   | 3280.3937 |           | 3804.9265 |

Geometry b

Relative energy = 11.00 kcal mol<sup>-1</sup>

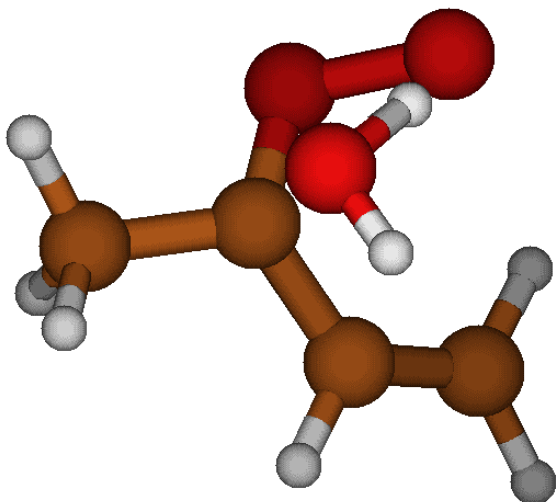

|                |           |   |           |           |           |
|----------------|-----------|---|-----------|-----------|-----------|
| 1              | 6         | 0 | -0.428855 | -0.318181 | -0.214489 |
| 2              | 8         | 0 | -0.313221 | 0.702025  | -1.004512 |
| 3              | 8         | 0 | 0.684613  | 1.612693  | -0.461079 |
| 4              | 8         | 0 | -0.673337 | 0.866203  | 1.388133  |
| 5              | 1         | 0 | 0.026316  | 1.433773  | 0.739005  |
| 6              | 1         | 0 | -0.134718 | 0.530033  | 2.112040  |
| 7              | 6         | 0 | 0.706631  | -1.096416 | 0.310396  |
| 8              | 6         | 0 | 1.985905  | -0.906269 | -0.011407 |
| 9              | 1         | 0 | 0.415112  | -1.934469 | 0.929974  |
| 10             | 1         | 0 | 2.282551  | -0.062393 | -0.613191 |
| 11             | 1         | 0 | 2.739967  | -1.596739 | 0.337253  |
| 12             | 6         | 0 | -1.728696 | -1.037255 | -0.364871 |
| 13             | 1         | 0 | -1.988267 | -1.516079 | 0.575210  |
| 14             | 1         | 0 | -1.625876 | -1.811000 | -1.126488 |
| 15             | 1         | 0 | -2.509427 | -0.341773 | -0.651905 |
| Frequencies -- | -696.1114 |   | 103.3479  |           | 118.4113  |
| Frequencies -- | 203.6312  |   | 272.2101  |           | 281.8229  |
| Frequencies -- | 316.3765  |   | 393.6546  |           | 401.9063  |
| Frequencies -- | 486.6747  |   | 614.5843  |           | 635.4449  |
| Frequencies -- | 674.1498  |   | 699.6737  |           | 796.5493  |
| Frequencies -- | 884.5974  |   | 983.6792  |           | 1013.6366 |
| Frequencies -- | 1021.5052 |   | 1030.7381 |           | 1085.6974 |
| Frequencies -- | 1132.4333 |   | 1246.3111 |           | 1344.4397 |
| Frequencies -- | 1411.6678 |   | 1445.7731 |           | 1457.4424 |
| Frequencies -- | 1491.9088 |   | 1506.4974 |           | 1570.4516 |
| Frequencies -- | 1683.7050 |   | 1870.9907 |           | 3068.2243 |
| Frequencies -- | 3144.8718 |   | 3170.5353 |           | 3184.8291 |
| Frequencies -- | 3187.6561 |   | 3280.2180 |           | 3831.2141 |

**VHPOH**

Geometry a

Relative energy = -26.98 kcal mol<sup>-1</sup>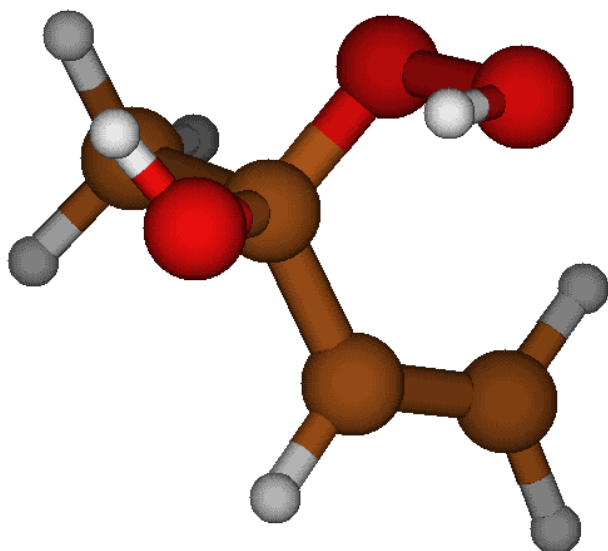

|                |           |   |           |           |           |
|----------------|-----------|---|-----------|-----------|-----------|
| 1              | 6         | 0 | -0.434176 | -0.223139 | 0.049316  |
| 2              | 8         | 0 | -0.160154 | 0.856789  | -0.832798 |
| 3              | 8         | 0 | 0.630349  | 1.851133  | -0.134189 |
| 4              | 8         | 0 | -1.108875 | 0.267069  | 1.199004  |
| 5              | 1         | 0 | -2.004795 | 0.501023  | 0.932304  |
| 6              | 1         | 0 | 0.059178  | 2.025786  | 0.630414  |
| 7              | 6         | 0 | 0.794731  | -0.936398 | 0.544691  |
| 8              | 6         | 0 | 1.981395  | -0.871087 | -0.042331 |
| 9              | 1         | 0 | 0.632025  | -1.554498 | 1.417612  |
| 10             | 1         | 0 | 2.144981  | -0.238779 | -0.901861 |
| 11             | 1         | 0 | 2.819228  | -1.437488 | 0.335679  |
| 12             | 6         | 0 | -1.326945 | -1.138142 | -0.775903 |
| 13             | 1         | 0 | -2.234171 | -0.610141 | -1.070451 |
| 14             | 1         | 0 | -1.593511 | -2.010144 | -0.183830 |
| 15             | 1         | 0 | -0.803526 | -1.463096 | -1.670639 |
| Frequencies -- | 97.3360   |   | 173.2096  |           | 221.3963  |
| Frequencies -- | 238.3839  |   | 285.0856  |           | 306.4104  |
| Frequencies -- | 327.0645  |   | 392.1530  |           | 449.3677  |
| Frequencies -- | 457.3646  |   | 568.7384  |           | 601.2449  |
| Frequencies -- | 697.1390  |   | 775.6259  |           | 882.3414  |
| Frequencies -- | 943.5583  |   | 962.9693  |           | 977.3258  |
| Frequencies -- | 1028.4957 |   | 1052.4216 |           | 1112.5386 |
| Frequencies -- | 1180.3117 |   | 1204.4873 |           | 1320.9402 |
| Frequencies -- | 1382.0702 |   | 1411.3412 |           | 1423.8875 |
| Frequencies -- | 1460.7418 |   | 1493.7442 |           | 1508.8581 |
| Frequencies -- | 1712.7621 |   | 3059.5616 |           | 3139.2879 |
| Frequencies -- | 3163.6236 |   | 3171.4476 |           | 3191.4398 |
| Frequencies -- | 3264.4236 |   | 3705.7594 |           | 3801.7305 |

Geometry b

Relative energy = -27.83 kcal mol<sup>-1</sup>

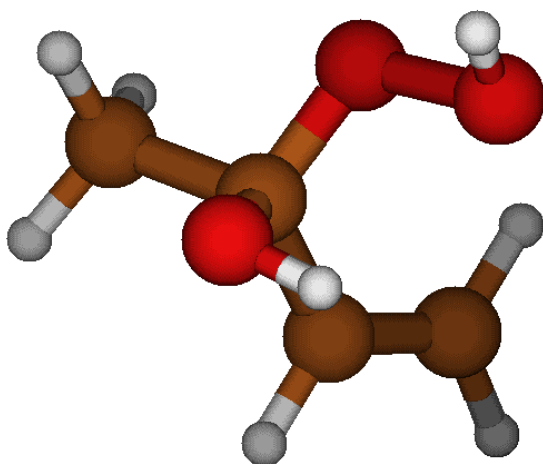

|                |           |   |           |           |           |
|----------------|-----------|---|-----------|-----------|-----------|
| 1              | 6         | 0 | -0.479325 | -0.185478 | 0.054686  |
| 2              | 8         | 0 | -0.043901 | 0.860097  | -0.822213 |
| 3              | 8         | 0 | 0.824881  | 1.746865  | -0.064732 |
| 4              | 8         | 0 | -1.093485 | 0.345171  | 1.202741  |
| 5              | 1         | 0 | 0.230724  | 2.502545  | 0.028156  |
| 6              | 1         | 0 | -0.387751 | 0.688009  | 1.761486  |
| 7              | 6         | 0 | 0.650511  | -1.107595 | 0.437219  |
| 8              | 6         | 0 | 1.868978  | -1.083358 | -0.087795 |
| 9              | 1         | 0 | 0.387891  | -1.836997 | 1.193870  |
| 10             | 1         | 0 | 2.139508  | -0.357824 | -0.839729 |
| 11             | 1         | 0 | 2.624074  | -1.786888 | 0.230389  |
| 12             | 6         | 0 | -1.551043 | -0.894863 | -0.751128 |
| 13             | 1         | 0 | -1.889533 | -1.771492 | -0.204763 |
| 14             | 1         | 0 | -1.149149 | -1.205883 | -1.711360 |
| 15             | 1         | 0 | -2.390446 | -0.220771 | -0.902306 |
| Frequencies -- | 104.1417  |   | 154.0731  |           | 208.2934  |
| Frequencies -- | 226.2055  |   | 251.2813  |           | 299.7956  |
| Frequencies -- | 325.5446  |   | 374.7833  |           | 438.7487  |
| Frequencies -- | 477.1720  |   | 561.6252  |           | 605.3659  |
| Frequencies -- | 705.1873  |   | 773.2915  |           | 882.3863  |
| Frequencies -- | 935.0130  |   | 968.1711  |           | 980.5835  |
| Frequencies -- | 1034.9798 |   | 1048.6518 |           | 1099.8717 |
| Frequencies -- | 1194.6209 |   | 1238.5412 |           | 1324.2960 |
| Frequencies -- | 1367.9514 |   | 1384.6870 |           | 1423.8268 |
| Frequencies -- | 1459.4309 |   | 1497.2096 |           | 1500.4669 |
| Frequencies -- | 1706.8475 |   | 3075.9029 |           | 3158.4723 |
| Frequencies -- | 3165.3588 |   | 3166.8158 |           | 3179.7441 |
| Frequencies -- | 3263.8458 |   | 3776.7739 |           | 3810.2997 |

*anti,cis...H<sub>2</sub>O=VHPOH'*

Geometry a

Relative energy = 11.74 kcal mol<sup>-1</sup>

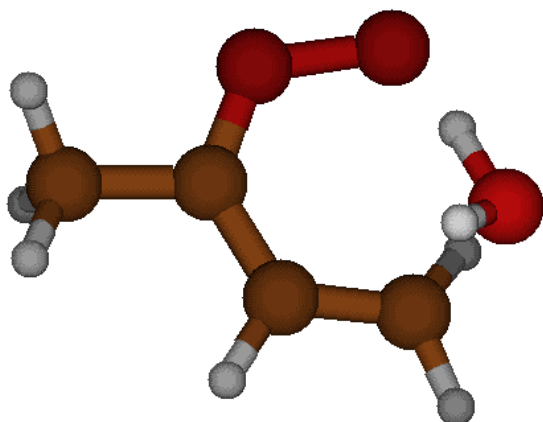

|                |           |   |           |           |           |
|----------------|-----------|---|-----------|-----------|-----------|
| 1              | 6         | 0 | 1.181696  | -1.105939 | -0.621422 |
| 2              | 6         | 0 | -0.123216 | -1.180428 | -0.152020 |
| 3              | 6         | 0 | -1.011849 | -0.110341 | -0.021072 |
| 4              | 8         | 0 | -0.739039 | 1.154097  | -0.083319 |
| 5              | 8         | 0 | 0.599650  | 1.560576  | -0.359944 |
| 6              | 6         | 0 | -2.459627 | -0.341139 | 0.286392  |
| 7              | 8         | 0 | 2.227800  | -0.005548 | 0.668072  |
| 8              | 1         | 0 | 1.775451  | -2.008299 | -0.617786 |
| 9              | 1         | 0 | 1.463794  | -0.353269 | -1.332398 |
| 10             | 1         | 0 | -0.483472 | -2.124135 | 0.229730  |
| 11             | 1         | 0 | -2.578998 | -1.209829 | 0.928832  |
| 12             | 1         | 0 | -2.891005 | 0.532767  | 0.765251  |
| 13             | 1         | 0 | -3.001900 | -0.532278 | -0.639758 |
| 14             | 1         | 0 | 1.549947  | 0.754006  | 0.378732  |
| 15             | 1         | 0 | 1.936864  | -0.304869 | 1.537654  |
| Frequencies -- | -451.3264 |   | 65.0174   |           | 110.6201  |
| Frequencies -- | 227.7562  |   | 278.6256  |           | 304.7792  |
| Frequencies -- | 319.7197  |   | 408.6109  |           | 448.6185  |
| Frequencies -- | 562.8341  |   | 613.3668  |           | 656.3177  |
| Frequencies -- | 704.6316  |   | 739.7717  |           | 831.8753  |
| Frequencies -- | 890.6157  |   | 991.4057  |           | 1040.1498 |
| Frequencies -- | 1057.7057 |   | 1112.3887 |           | 1157.8441 |
| Frequencies -- | 1229.5522 |   | 1258.1369 |           | 1290.5621 |
| Frequencies -- | 1416.7735 |   | 1448.8475 |           | 1485.2244 |
| Frequencies -- | 1493.4663 |   | 1541.9056 |           | 1565.1270 |
| Frequencies -- | 1697.3704 |   | 2060.1566 |           | 3066.0558 |
| Frequencies -- | 3134.0600 |   | 3168.0256 |           | 3188.4964 |
| Frequencies -- | 3204.9873 |   | 3305.3259 |           | 3809.4140 |

Geometry b

Relative energy = 11.65 kcal mol<sup>-1</sup>

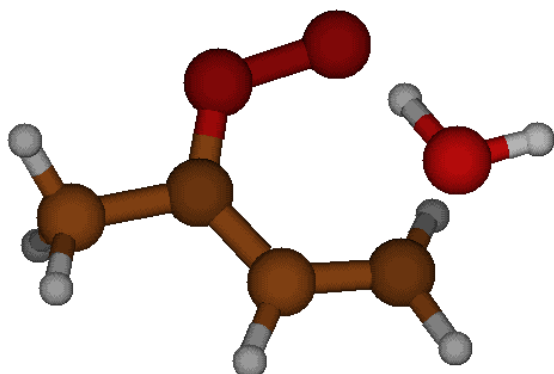

|                |           |   |           |           |           |
|----------------|-----------|---|-----------|-----------|-----------|
| 1              | 6         | 0 | 1.176175  | -1.119960 | -0.598814 |
| 2              | 6         | 0 | -0.134488 | -1.181748 | -0.143371 |
| 3              | 6         | 0 | -1.015770 | -0.108200 | -0.022925 |
| 4              | 8         | 0 | -0.739086 | 1.156601  | -0.097632 |
| 5              | 8         | 0 | 0.611049  | 1.541843  | -0.359195 |
| 6              | 6         | 0 | -2.464637 | -0.327176 | 0.288110  |
| 7              | 8         | 0 | 2.115162  | -0.049638 | 0.772260  |
| 8              | 1         | 0 | 1.758732  | -2.029269 | -0.572430 |
| 9              | 1         | 0 | 1.459437  | -0.382629 | -1.325916 |
| 10             | 1         | 0 | -0.495723 | -2.115499 | 0.259617  |
| 11             | 1         | 0 | -2.589570 | -1.205918 | 0.915094  |
| 12             | 1         | 0 | -2.882251 | 0.542530  | 0.786521  |
| 13             | 1         | 0 | -3.014704 | -0.493190 | -0.638297 |
| 14             | 1         | 0 | 1.483994  | 0.741569  | 0.412075  |
| 15             | 1         | 0 | 3.015408  | 0.174462  | 0.501871  |
| Frequencies -- | -519.6163 |   | 53.1173   |           | 109.6619  |
| Frequencies -- | 227.0268  |   | 285.2376  |           | 306.7603  |
| Frequencies -- | 321.4268  |   | 417.5422  |           | 439.8591  |
| Frequencies -- | 573.6071  |   | 613.3627  |           | 657.9144  |
| Frequencies -- | 732.2839  |   | 740.1208  |           | 835.3925  |
| Frequencies -- | 891.0237  |   | 983.4814  |           | 1040.2060 |
| Frequencies -- | 1059.3293 |   | 1104.9590 |           | 1120.0779 |
| Frequencies -- | 1207.9229 |   | 1254.7307 |           | 1292.0503 |
| Frequencies -- | 1416.7748 |   | 1445.4571 |           | 1485.1901 |
| Frequencies -- | 1493.8964 |   | 1537.9054 |           | 1551.6986 |
| Frequencies -- | 1718.6760 |   | 1890.5637 |           | 3066.4609 |
| Frequencies -- | 3135.6372 |   | 3168.8694 |           | 3184.9716 |
| Frequencies -- | 3210.8343 |   | 3299.5086 |           | 3782.1838 |

**VHPOH'**

Geometry a

Relative energy = -20.65 kcal mol<sup>-1</sup>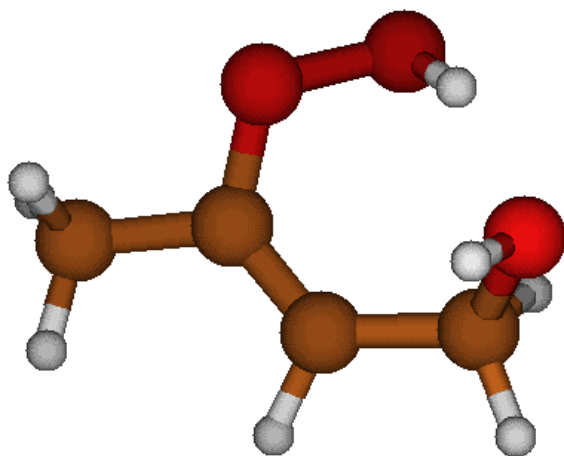

|                |           |   |           |           |           |
|----------------|-----------|---|-----------|-----------|-----------|
| 1              | 6         | 0 | 1.502722  | -0.866820 | -0.424407 |
| 2              | 6         | 0 | 0.028286  | -1.103276 | -0.299031 |
| 3              | 6         | 0 | -0.942073 | -0.215242 | -0.032206 |
| 4              | 8         | 0 | -0.834620 | 1.133058  | 0.142981  |
| 5              | 8         | 0 | 0.371928  | 1.700828  | -0.412714 |
| 6              | 6         | 0 | -2.375012 | -0.588153 | 0.191714  |
| 7              | 8         | 0 | 2.042984  | -0.075121 | 0.660001  |
| 8              | 1         | 0 | 2.017835  | -1.826773 | -0.458795 |
| 9              | 1         | 0 | 1.765791  | -0.313658 | -1.321493 |
| 10             | 1         | 0 | -0.304730 | -2.126605 | -0.386805 |
| 11             | 1         | 0 | -2.496462 | -1.666392 | 0.158629  |
| 12             | 1         | 0 | -2.712873 | -0.225529 | 1.162021  |
| 13             | 1         | 0 | -3.005813 | -0.129206 | -0.568223 |
| 14             | 1         | 0 | 1.056242  | 1.343666  | 0.193923  |
| 15             | 1         | 0 | 1.754139  | -0.484672 | 1.482180  |
| Frequencies -- | 116.9832  |   | 136.7951  |           | 170.9232  |
| Frequencies -- | 237.4197  |   | 272.5092  |           | 318.6126  |
| Frequencies -- | 356.1842  |   | 420.0098  |           | 486.2482  |
| Frequencies -- | 596.2211  |   | 679.0309  |           | 733.6570  |
| Frequencies -- | 769.3643  |   | 836.9906  |           | 914.3297  |
| Frequencies -- | 972.5143  |   | 1024.5142 |           | 1035.6495 |
| Frequencies -- | 1076.8781 |   | 1118.5148 |           | 1194.8865 |
| Frequencies -- | 1224.5794 |   | 1364.2247 |           | 1379.0228 |
| Frequencies -- | 1418.7083 |   | 1427.0220 |           | 1484.0339 |
| Frequencies -- | 1503.6347 |   | 1510.8655 |           | 1527.3541 |
| Frequencies -- | 1712.0466 |   | 3062.2105 |           | 3066.9710 |
| Frequencies -- | 3122.0853 |   | 3129.4466 |           | 3162.2357 |
| Frequencies -- | 3205.1317 |   | 3476.1743 |           | 3810.9337 |

Geometry b

Relative energy = -19.39 kcal mol<sup>-1</sup>

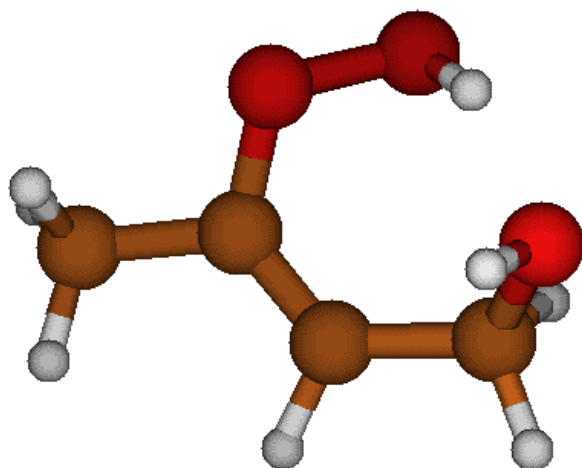

|                |           |   |           |           |           |
|----------------|-----------|---|-----------|-----------|-----------|
| 1              | 6         | 0 | 1.490886  | -0.866167 | -0.425176 |
| 2              | 6         | 0 | 0.023667  | -1.098123 | -0.255849 |
| 3              | 6         | 0 | -0.958991 | -0.213597 | -0.032898 |
| 4              | 8         | 0 | -0.886408 | 1.142335  | 0.080062  |
| 5              | 8         | 0 | 0.369535  | 1.697329  | -0.364033 |
| 6              | 6         | 0 | -2.385128 | -0.603828 | 0.207766  |
| 7              | 8         | 0 | 1.999327  | -0.121700 | 0.711889  |
| 8              | 1         | 0 | 1.992591  | -1.832336 | -0.470572 |
| 9              | 1         | 0 | 1.714718  | -0.316972 | -1.339932 |
| 10             | 1         | 0 | -0.297312 | -2.128072 | -0.265130 |
| 11             | 1         | 0 | -2.490620 | -1.683769 | 0.181673  |
| 12             | 1         | 0 | -2.717309 | -0.240502 | 1.179539  |
| 13             | 1         | 0 | -3.030243 | -0.160094 | -0.549227 |
| 14             | 1         | 0 | 0.998547  | 1.315318  | 0.284585  |
| 15             | 1         | 0 | 2.947393  | -0.006993 | 0.592666  |
| Frequencies -- | 114.1636  |   | 131.0879  |           | 164.6963  |
| Frequencies -- | 231.3946  |   | 270.9307  |           | 319.2052  |
| Frequencies -- | 362.3171  |   | 390.3695  |           | 483.7937  |
| Frequencies -- | 592.0545  |   | 651.4890  |           | 697.8492  |
| Frequencies -- | 765.7936  |   | 837.5721  |           | 918.0522  |
| Frequencies -- | 988.3888  |   | 1025.9377 |           | 1061.2584 |
| Frequencies -- | 1078.2323 |   | 1112.2956 |           | 1210.9950 |
| Frequencies -- | 1241.9220 |   | 1283.1551 |           | 1387.3697 |
| Frequencies -- | 1422.5277 |   | 1453.1533 |           | 1483.9119 |
| Frequencies -- | 1505.1795 |   | 1521.8337 |           | 1531.5533 |
| Frequencies -- | 1720.5676 |   | 3052.8464 |           | 3063.1287 |
| Frequencies -- | 3092.5907 |   | 3123.0977 |           | 3163.6576 |
| Frequencies -- | 3212.8775 |   | 3492.0836 |           | 3817.3314 |



### 5.3 MVK-oxide + SO<sub>2</sub>.

Syn-trans; endo

syn,trans...SO<sub>2</sub>

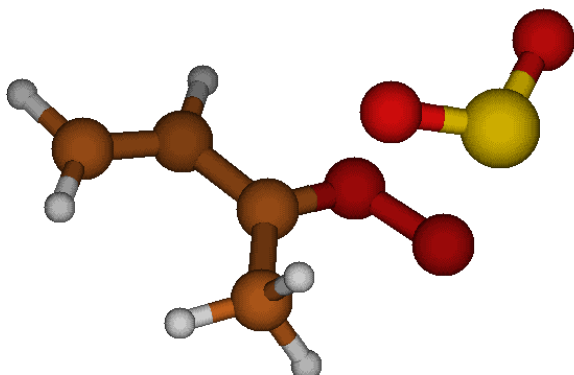

|                |           |   |           |           |           |
|----------------|-----------|---|-----------|-----------|-----------|
| 1              | 6         | 0 | 1.311109  | 0.345350  | -0.209375 |
| 2              | 8         | 0 | 0.362537  | 0.503429  | -1.056591 |
| 3              | 8         | 0 | -0.632142 | 1.399004  | -0.710766 |
| 4              | 6         | 0 | 1.409318  | 1.217912  | 0.974013  |
| 5              | 6         | 0 | 2.242344  | -0.684275 | -0.604152 |
| 6              | 1         | 0 | 1.155129  | 2.232114  | 0.669745  |
| 7              | 1         | 0 | 0.660746  | 0.906862  | 1.700368  |
| 8              | 1         | 0 | 2.397493  | 1.173493  | 1.416686  |
| 9              | 1         | 0 | 1.999064  | -1.194353 | -1.525464 |
| 10             | 6         | 0 | 3.318454  | -1.029680 | 0.110503  |
| 11             | 1         | 0 | 3.572002  | -0.548981 | 1.042587  |
| 12             | 1         | 0 | 3.967801  | -1.822831 | -0.226365 |
| 13             | 16        | 0 | -2.051709 | -0.120369 | 0.400535  |
| 14             | 8         | 0 | -0.930287 | -0.777883 | 1.093355  |
| 15             | 8         | 0 | -2.626639 | -0.864081 | -0.715005 |
| Frequencies -- | 43.9908   |   | 59.0891   |           | 107.1044  |
| Frequencies -- | 120.3070  |   | 151.7698  |           | 153.3231  |
| Frequencies -- | 201.5872  |   | 270.5415  |           | 291.4578  |
| Frequencies -- | 340.6993  |   | 359.4257  |           | 456.4786  |
| Frequencies -- | 496.1234  |   | 526.9041  |           | 600.8922  |
| Frequencies -- | 688.5251  |   | 809.4764  |           | 942.7130  |
| Frequencies -- | 995.3231  |   | 1014.8939 |           | 1028.0444 |
| Frequencies -- | 1049.5269 |   | 1071.1873 |           | 1106.3835 |
| Frequencies -- | 1278.9453 |   | 1312.2044 |           | 1343.8888 |
| Frequencies -- | 1398.1147 |   | 1454.0322 |           | 1471.3221 |
| Frequencies -- | 1504.1864 |   | 1506.2464 |           | 1675.7023 |
| Frequencies -- | 3074.6456 |   | 3138.7306 |           | 3182.0912 |
| Frequencies -- | 3189.5210 |   | 3209.4786 |           | 3275.2279 |

*syn-trans*...SO<sub>2</sub> = SOZ

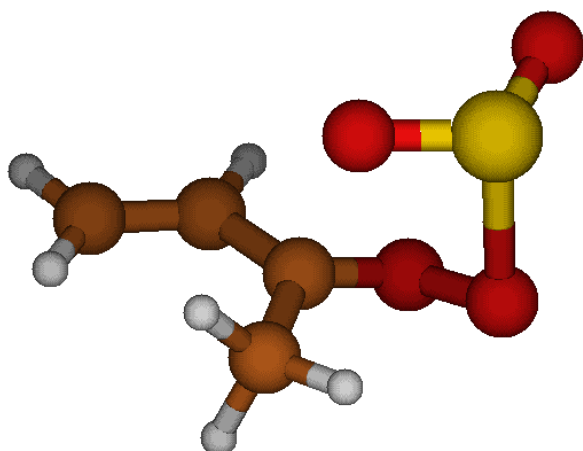

|                |           |   |           |           |           |
|----------------|-----------|---|-----------|-----------|-----------|
| 1              | 6         | 0 | -1.048953 | 0.326164  | 0.232035  |
| 2              | 8         | 0 | -0.167040 | 0.505860  | 1.168655  |
| 3              | 8         | 0 | 0.930174  | 1.285150  | 0.769924  |
| 4              | 6         | 0 | -1.349697 | 1.366447  | -0.783806 |
| 5              | 6         | 0 | -1.954410 | -0.760475 | 0.558780  |
| 6              | 1         | 0 | -0.507744 | 2.036212  | -0.890137 |
| 7              | 1         | 0 | -1.580017 | 0.907446  | -1.738432 |
| 8              | 1         | 0 | -2.222431 | 1.924200  | -0.436409 |
| 9              | 1         | 0 | -1.641755 | -1.390528 | 1.378690  |
| 10             | 6         | 0 | -3.082346 | -0.997546 | -0.113981 |
| 11             | 1         | 0 | -3.393034 | -0.385517 | -0.947113 |
| 12             | 1         | 0 | -3.718728 | -1.826951 | 0.153285  |
| 13             | 16        | 0 | 1.811584  | -0.131809 | -0.473040 |
| 14             | 8         | 0 | 0.483112  | -0.516972 | -1.065376 |
| 15             | 8         | 0 | 2.340104  | -1.119471 | 0.463120  |
| Frequencies -- | -172.4600 |   | 72.5411   |           | 96.7084   |
| Frequencies -- | 176.3007  |   | 188.1187  |           | 203.9954  |
| Frequencies -- | 244.3385  |   | 277.0329  |           | 354.5020  |
| Frequencies -- | 375.1692  |   | 427.1594  |           | 478.1019  |
| Frequencies -- | 495.1429  |   | 552.4431  |           | 596.1116  |
| Frequencies -- | 690.2365  |   | 801.6257  |           | 940.5472  |
| Frequencies -- | 978.0869  |   | 1001.8076 |           | 1008.0748 |
| Frequencies -- | 1028.9826 |   | 1068.6190 |           | 1077.9155 |
| Frequencies -- | 1243.4173 |   | 1310.4264 |           | 1349.2203 |
| Frequencies -- | 1401.5745 |   | 1443.9629 |           | 1464.9777 |
| Frequencies -- | 1497.4740 |   | 1504.4880 |           | 1683.5791 |
| Frequencies -- | 3058.6222 |   | 3161.8023 |           | 3181.6111 |
| Frequencies -- | 3215.2830 |   | 3218.4911 |           | 3272.7976 |

SOZ

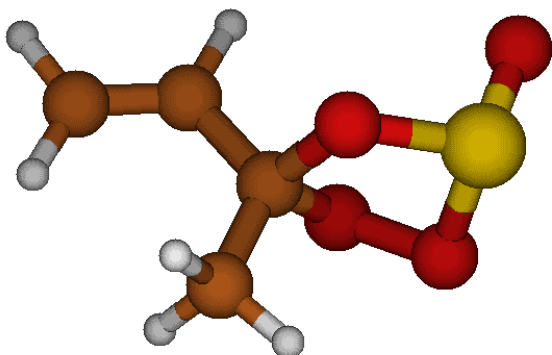

|                |           |   |           |           |           |
|----------------|-----------|---|-----------|-----------|-----------|
| 1              | 6         | 0 | -0.810866 | 0.210377  | -0.022436 |
| 2              | 8         | 0 | -0.115855 | 0.371045  | 1.209972  |
| 3              | 8         | 0 | 1.142045  | 1.007981  | 0.821016  |
| 4              | 6         | 0 | -1.420496 | 1.503020  | -0.509191 |
| 5              | 6         | 0 | -1.728288 | -0.951062 | 0.204200  |
| 6              | 1         | 0 | -0.645604 | 2.261924  | -0.563145 |
| 7              | 1         | 0 | -1.850944 | 1.365390  | -1.497444 |
| 8              | 1         | 0 | -2.191085 | 1.835134  | 0.181579  |
| 9              | 1         | 0 | -1.216624 | -1.851468 | 0.514245  |
| 10             | 6         | 0 | -3.044724 | -0.918906 | 0.041466  |
| 11             | 1         | 0 | -3.566516 | -0.026945 | -0.270702 |
| 12             | 1         | 0 | -3.641479 | -1.801243 | 0.215963  |
| 13             | 16        | 0 | 1.739115  | -0.003209 | -0.404496 |
| 14             | 8         | 0 | 0.207454  | -0.208514 | -0.981424 |
| 15             | 8         | 0 | 2.180438  | -1.269514 | 0.151336  |
| Frequencies -- | 72.1395   |   | 83.9393   |           | 185.3454  |
| Frequencies -- | 255.6892  |   | 287.8302  |           | 290.3490  |
| Frequencies -- | 323.3446  |   | 383.4275  |           | 426.5892  |
| Frequencies -- | 474.0264  |   | 485.8914  |           | 560.9295  |
| Frequencies -- | 643.5201  |   | 651.0299  |           | 664.1314  |
| Frequencies -- | 744.0322  |   | 788.4121  |           | 835.6166  |
| Frequencies -- | 895.6685  |   | 934.7505  |           | 986.8967  |
| Frequencies -- | 1034.2859 |   | 1036.2261 |           | 1117.0259 |
| Frequencies -- | 1187.2859 |   | 1259.7703 |           | 1299.4224 |
| Frequencies -- | 1332.1137 |   | 1421.2332 |           | 1461.7920 |
| Frequencies -- | 1501.2734 |   | 1508.2993 |           | 1709.3089 |
| Frequencies -- | 3081.2734 |   | 3162.8175 |           | 3168.5959 |
| Frequencies -- | 3177.2524 |   | 3205.3243 |           | 3264.6000 |

SOZ = SOZ'

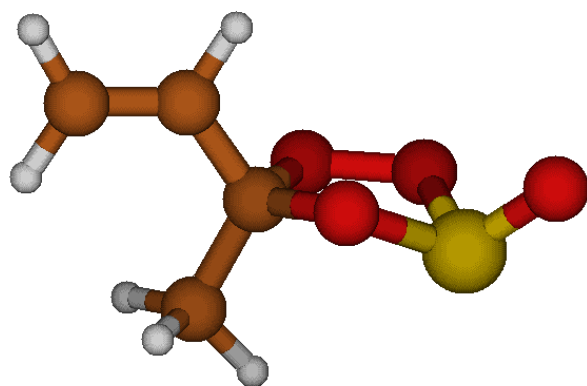

|                |           |   |           |           |           |
|----------------|-----------|---|-----------|-----------|-----------|
| 1              | 6         | 0 | -0.847639 | 0.162309  | -0.060086 |
| 2              | 16        | 0 | 1.700713  | 0.153586  | -0.346480 |
| 3              | 8         | 0 | 1.138013  | 0.406572  | 1.241100  |
| 4              | 8         | 0 | -0.302221 | 0.585166  | 1.238309  |
| 5              | 8         | 0 | 0.208035  | -0.466602 | -0.766873 |
| 6              | 6         | 0 | -1.334630 | 1.398666  | -0.782488 |
| 7              | 6         | 0 | -1.865589 | -0.890803 | 0.245541  |
| 8              | 1         | 0 | -2.098553 | 1.900783  | -0.194820 |
| 9              | 1         | 0 | -1.739638 | 1.131311  | -1.755411 |
| 10             | 1         | 0 | -0.502821 | 2.084971  | -0.922412 |
| 11             | 6         | 0 | -3.163093 | -0.797152 | -0.016721 |
| 12             | 1         | 0 | -1.448557 | -1.762579 | 0.730602  |
| 13             | 1         | 0 | -3.594198 | 0.067877  | -0.497806 |
| 14             | 1         | 0 | -3.837443 | -1.597243 | 0.248066  |
| 15             | 8         | 0 | 2.615612  | -0.965213 | -0.260288 |
| Frequencies -- | -180.1149 |   | 54.0427   |           | 89.1287   |
| Frequencies -- | 244.6280  |   | 271.3617  |           | 281.1275  |
| Frequencies -- | 295.3848  |   | 366.1179  |           | 392.3921  |
| Frequencies -- | 435.7800  |   | 468.1111  |           | 544.9621  |
| Frequencies -- | 599.8537  |   | 656.1245  |           | 694.0788  |
| Frequencies -- | 732.2315  |   | 810.4111  |           | 866.9843  |
| Frequencies -- | 931.2864  |   | 949.9810  |           | 981.3546  |
| Frequencies -- | 1030.7971 |   | 1042.1053 |           | 1113.1599 |
| Frequencies -- | 1192.3260 |   | 1271.7153 |           | 1288.2060 |
| Frequencies -- | 1331.2705 |   | 1422.6896 |           | 1461.8080 |
| Frequencies -- | 1494.3423 |   | 1509.3856 |           | 1707.9555 |
| Frequencies -- | 3074.2157 |   | 3153.6338 |           | 3161.6426 |
| Frequencies -- | 3176.4577 |   | 3202.1638 |           | 3263.2218 |

SOZ'

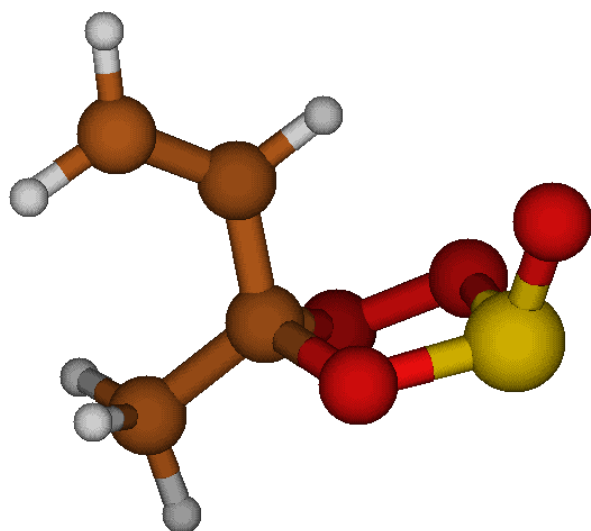

|                |           |   |           |           |           |
|----------------|-----------|---|-----------|-----------|-----------|
| 1              | 6         | 0 | 0.848155  | -0.372341 | -0.050003 |
| 2              | 16        | 0 | -1.700029 | -0.127067 | -0.332040 |
| 3              | 8         | 0 | -1.015350 | -0.443867 | 1.235632  |
| 4              | 8         | 0 | 0.269870  | -1.072385 | 1.042397  |
| 5              | 8         | 0 | -0.232607 | -0.358200 | -1.035797 |
| 6              | 6         | 0 | 1.946571  | -1.254082 | -0.587142 |
| 7              | 6         | 0 | 1.216625  | 1.033716  | 0.319336  |
| 8              | 1         | 0 | 2.732503  | -1.362162 | 0.155517  |
| 9              | 1         | 0 | 2.362417  | -0.814681 | -1.488923 |
| 10             | 1         | 0 | 1.531517  | -2.228815 | -0.822522 |
| 11             | 6         | 0 | 2.407956  | 1.579909  | 0.108251  |
| 12             | 1         | 0 | 0.425099  | 1.603019  | 0.784636  |
| 13             | 1         | 0 | 3.219323  | 1.045240  | -0.362458 |
| 14             | 1         | 0 | 2.603840  | 2.598932  | 0.405799  |
| 15             | 8         | 0 | -2.045672 | 1.282993  | -0.254989 |
| Frequencies -- | 70.7843   |   | 112.9503  |           | 188.8152  |
| Frequencies -- | 216.0415  |   | 250.8206  |           | 299.2589  |
| Frequencies -- | 337.5532  |   | 360.2643  |           | 387.9994  |
| Frequencies -- | 437.6159  |   | 495.8934  |           | 547.4546  |
| Frequencies -- | 606.2036  |   | 667.1724  |           | 703.4317  |
| Frequencies -- | 757.4715  |   | 784.7002  |           | 832.5222  |
| Frequencies -- | 908.0846  |   | 947.0281  |           | 979.6173  |
| Frequencies -- | 1036.3545 |   | 1042.5875 |           | 1122.9048 |
| Frequencies -- | 1186.0015 |   | 1251.4788 |           | 1310.2085 |
| Frequencies -- | 1352.0258 |   | 1421.1886 |           | 1466.4078 |
| Frequencies -- | 1500.7091 |   | 1506.7893 |           | 1708.8968 |
| Frequencies -- | 3086.5516 |   | 3169.2442 |           | 3174.5349 |
| Frequencies -- | 3177.4720 |   | 3213.5355 |           | 3260.3609 |

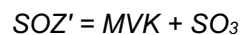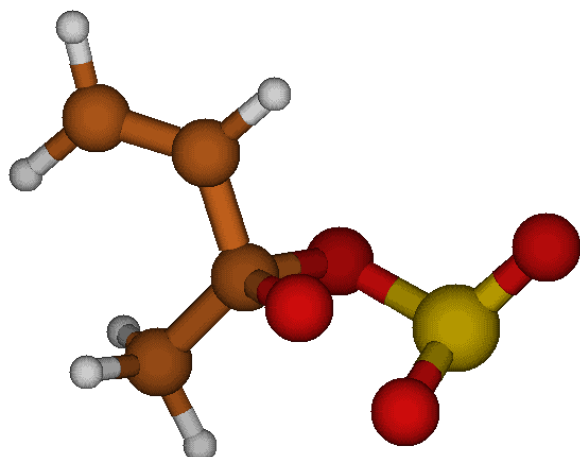

|                |           |   |           |           |           |
|----------------|-----------|---|-----------|-----------|-----------|
| 1              | 8         | 0 | 0.268666  | 0.387733  | 1.287376  |
| 2              | 6         | 0 | 0.854924  | 0.245856  | 0.094638  |
| 3              | 8         | 0 | -0.209985 | -0.312955 | -0.909070 |
| 4              | 16        | 0 | -1.690468 | -0.037483 | -0.364985 |
| 5              | 8         | 0 | -1.367533 | 1.082298  | 0.612173  |
| 6              | 8         | 0 | -2.299841 | -1.260266 | 0.130902  |
| 7              | 6         | 0 | 1.393812  | 1.503594  | -0.542399 |
| 8              | 6         | 0 | 1.790829  | -0.937246 | 0.239469  |
| 9              | 6         | 0 | 3.088824  | -0.885572 | -0.026553 |
| 10             | 1         | 0 | 0.596203  | 2.238434  | -0.594597 |
| 11             | 1         | 0 | 1.772095  | 1.305811  | -1.541350 |
| 12             | 1         | 0 | 2.191488  | 1.902718  | 0.079789  |
| 13             | 1         | 0 | 1.308823  | -1.828074 | 0.612782  |
| 14             | 1         | 0 | 3.572867  | 0.007988  | -0.389188 |
| 15             | 1         | 0 | 3.705215  | -1.761415 | 0.110345  |
| Frequencies -- | -450.0671 |   | 78.7750   |           | 90.7688   |
| Frequencies -- | 163.8373  |   | 254.1774  |           | 278.8818  |
| Frequencies -- | 291.2274  |   | 311.7642  |           | 359.7220  |
| Frequencies -- | 407.5348  |   | 434.9676  |           | 483.7795  |
| Frequencies -- | 549.3286  |   | 556.3118  |           | 616.6765  |
| Frequencies -- | 667.2262  |   | 775.1922  |           | 832.5499  |
| Frequencies -- | 907.0316  |   | 948.6545  |           | 968.4700  |
| Frequencies -- | 1020.6555 |   | 1042.7559 |           | 1090.9731 |
| Frequencies -- | 1187.1692 |   | 1252.4011 |           | 1290.6189 |
| Frequencies -- | 1327.4357 |   | 1417.1863 |           | 1448.0406 |
| Frequencies -- | 1498.4711 |   | 1502.8134 |           | 1687.5787 |
| Frequencies -- | 3079.7277 |   | 3159.8213 |           | 3172.1172 |
| Frequencies -- | 3176.9569 |   | 3221.7848 |           | 3265.9236 |

MVK

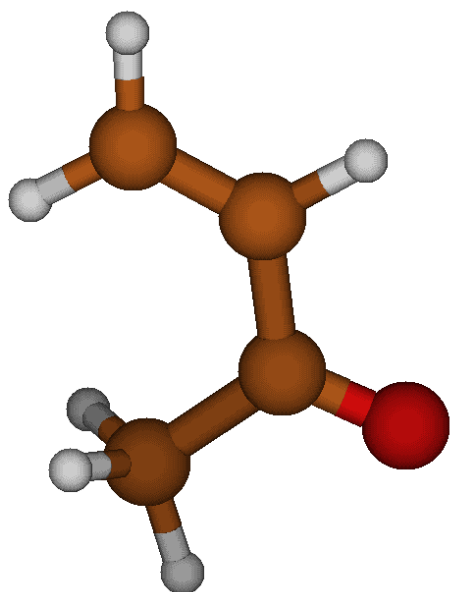

|                |           |   |           |           |           |
|----------------|-----------|---|-----------|-----------|-----------|
| 1              | 6         | 0 | -0.468498 | -1.879311 | 0.000000  |
| 2              | 6         | 0 | -0.887861 | -0.614171 | 0.000000  |
| 3              | 6         | 0 | 0.000000  | 0.574545  | 0.000000  |
| 4              | 8         | 0 | -0.490257 | 1.689933  | 0.000000  |
| 5              | 6         | 0 | 1.497998  | 0.373306  | 0.000000  |
| 6              | 1         | 0 | 0.581237  | -2.134287 | 0.000000  |
| 7              | 1         | 0 | -1.168614 | -2.701731 | 0.000000  |
| 8              | 1         | 0 | -1.942964 | -0.375221 | 0.000000  |
| 9              | 1         | 0 | 1.980827  | 1.344719  | 0.000000  |
| 10             | 1         | 0 | 1.810871  | -0.189581 | 0.878903  |
| 11             | 1         | 0 | 1.810871  | -0.189581 | -0.878903 |
| Frequencies -- | 121.9725  |   | 130.7326  |           | 281.7531  |
| Frequencies -- | 433.2220  |   | 489.3543  |           | 537.8415  |
| Frequencies -- | 700.4204  |   | 769.8615  |           | 951.4588  |
| Frequencies -- | 994.8900  |   | 1047.6423 |           | 1055.0048 |
| Frequencies -- | 1077.8724 |   | 1280.3410 |           | 1314.1765 |
| Frequencies -- | 1398.3095 |   | 1455.8343 |           | 1485.3347 |
| Frequencies -- | 1492.8355 |   | 1679.8415 |           | 1738.4354 |
| Frequencies -- | 3061.5825 |   | 3126.2050 |           | 3169.3574 |
| Frequencies -- | 3173.3711 |   | 3196.0384 |           | 3256.1623 |

**syn-trans; exo**  
syn-trans...SO<sub>2</sub>

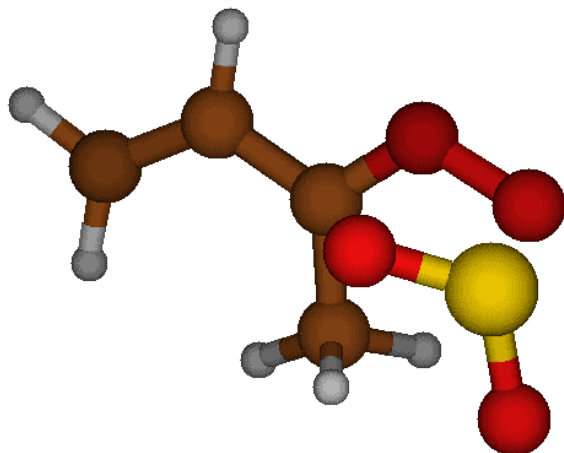

|                |           |   |           |           |           |
|----------------|-----------|---|-----------|-----------|-----------|
| 1              | 6         | 0 | 1.236440  | 0.390605  | 0.151715  |
| 2              | 8         | 0 | 0.531658  | 1.231267  | -0.511902 |
| 3              | 8         | 0 | -0.698475 | 1.566097  | 0.030360  |
| 4              | 6         | 0 | 0.853829  | -0.015215 | 1.518422  |
| 5              | 6         | 0 | 2.440205  | 0.006535  | -0.547209 |
| 6              | 1         | 0 | 0.373840  | 0.833874  | 2.001684  |
| 7              | 1         | 0 | 0.112485  | -0.809683 | 1.476293  |
| 8              | 1         | 0 | 1.720614  | -0.353260 | 2.075580  |
| 9              | 1         | 0 | 2.567783  | 0.448503  | -1.525056 |
| 10             | 6         | 0 | 3.332282  | -0.862677 | -0.061322 |
| 11             | 1         | 0 | 3.213087  | -1.333555 | 0.902154  |
| 12             | 1         | 0 | 4.204064  | -1.132818 | -0.636936 |
| 13             | 16        | 0 | -1.981897 | -0.265887 | -0.441372 |
| 14             | 8         | 0 | -0.833566 | -1.076429 | -0.884748 |
| 15             | 8         | 0 | -2.456875 | -0.535231 | 0.916114  |
| Frequencies -- | 57.0917   |   | 72.7004   |           | 84.0406   |
| Frequencies -- | 127.4748  |   | 152.7600  |           | 183.4696  |
| Frequencies -- | 224.9502  |   | 265.0922  |           | 313.7244  |
| Frequencies -- | 347.3043  |   | 366.5307  |           | 454.8247  |
| Frequencies -- | 497.4793  |   | 524.0630  |           | 602.8360  |
| Frequencies -- | 690.4562  |   | 809.0349  |           | 938.2261  |
| Frequencies -- | 999.9873  |   | 1007.4196 |           | 1027.3797 |
| Frequencies -- | 1051.0598 |   | 1072.4356 |           | 1101.9211 |
| Frequencies -- | 1265.6009 |   | 1312.3075 |           | 1346.9207 |
| Frequencies -- | 1400.8599 |   | 1451.5061 |           | 1470.9465 |
| Frequencies -- | 1502.7602 |   | 1510.9854 |           | 1676.4860 |
| Frequencies -- | 3079.0081 |   | 3147.2198 |           | 3180.5378 |
| Frequencies -- | 3186.1877 |   | 3210.9597 |           | 3275.6186 |



*syn-trans*...SO<sub>2</sub> = SOZ

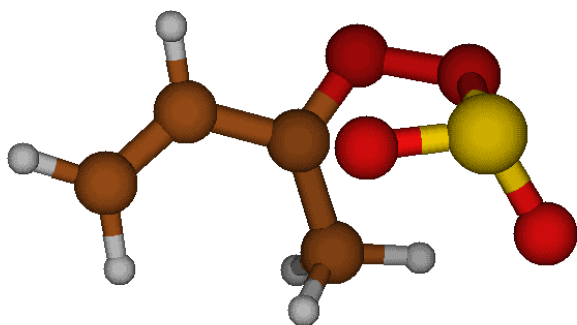

|                |           |   |           |           |           |
|----------------|-----------|---|-----------|-----------|-----------|
| 1              | 6         | 0 | 1.015510  | 0.302431  | 0.248281  |
| 2              | 8         | 0 | 0.388404  | 1.420436  | 0.019286  |
| 3              | 8         | 0 | -0.942872 | 1.412902  | 0.449094  |
| 4              | 6         | 0 | 0.745309  | -0.540890 | 1.442817  |
| 5              | 6         | 0 | 2.258943  | 0.236659  | -0.500454 |
| 6              | 1         | 0 | -0.251816 | -0.367311 | 1.822691  |
| 7              | 1         | 0 | 0.854319  | -1.590591 | 1.194434  |
| 8              | 1         | 0 | 1.485635  | -0.277088 | 2.201787  |
| 9              | 1         | 0 | 2.375865  | 0.984563  | -1.271158 |
| 10             | 6         | 0 | 3.192724  | -0.691806 | -0.285424 |
| 11             | 1         | 0 | 3.078440  | -1.456637 | 0.467523  |
| 12             | 1         | 0 | 4.096171  | -0.710615 | -0.875189 |
| 13             | 16        | 0 | -1.767337 | -0.163050 | -0.568130 |
| 14             | 8         | 0 | -0.420516 | -0.671740 | -1.012252 |
| 15             | 8         | 0 | -2.354532 | -0.888083 | 0.558706  |
| Frequencies -- | -167.7993 |   | 91.1538   |           | 110.1131  |
| Frequencies -- | 159.7578  |   | 187.1136  |           | 247.0902  |
| Frequencies -- | 266.6364  |   | 284.8685  |           | 345.7335  |
| Frequencies -- | 394.7844  |   | 410.2281  |           | 474.9027  |
| Frequencies -- | 501.1198  |   | 537.0575  |           | 602.0049  |
| Frequencies -- | 690.2732  |   | 801.1307  |           | 948.5216  |
| Frequencies -- | 983.4073  |   | 1000.2142 |           | 1006.4490 |
| Frequencies -- | 1028.6333 |   | 1066.6902 |           | 1080.4563 |
| Frequencies -- | 1232.2081 |   | 1309.2590 |           | 1351.2467 |
| Frequencies -- | 1407.1312 |   | 1438.6424 |           | 1464.6375 |
| Frequencies -- | 1495.2816 |   | 1507.5699 |           | 1684.6645 |
| Frequencies -- | 3055.7108 |   | 3161.6268 |           | 3182.1052 |
| Frequencies -- | 3213.7608 |   | 3218.5836 |           | 3273.3685 |

SOZ

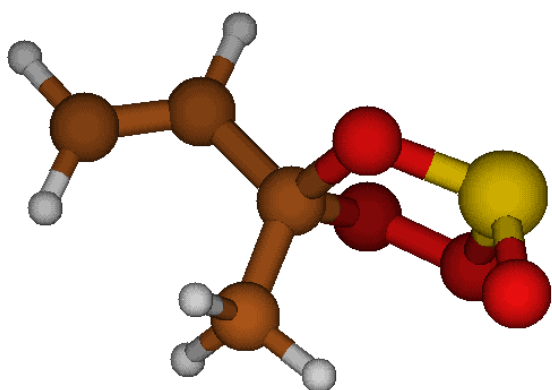

|                |           |   |           |           |           |
|----------------|-----------|---|-----------|-----------|-----------|
| 1              | 6         | 0 | -0.796759 | 0.007833  | 0.094681  |
| 2              | 8         | 0 | -0.321012 | -1.084616 | 0.869362  |
| 3              | 8         | 0 | 1.097683  | -0.838653 | 1.009361  |
| 4              | 6         | 0 | -0.802549 | 1.314193  | 0.854941  |
| 5              | 6         | 0 | -2.095677 | -0.456136 | -0.484579 |
| 6              | 1         | 0 | 0.184364  | 1.510115  | 1.260075  |
| 7              | 1         | 0 | -1.072421 | 2.127871  | 0.187250  |
| 8              | 1         | 0 | -1.518233 | 1.259142  | 1.671205  |
| 9              | 1         | 0 | -2.021490 | -1.380097 | -1.040618 |
| 10             | 6         | 0 | -3.252938 | 0.179585  | -0.353186 |
| 11             | 1         | 0 | -3.344714 | 1.104208  | 0.195975  |
| 12             | 1         | 0 | -4.150914 | -0.216053 | -0.802877 |
| 13             | 16        | 0 | 1.693998  | -0.232978 | -0.505424 |
| 14             | 8         | 0 | 0.157025  | 0.063183  | -1.012056 |
| 15             | 8         | 0 | 2.379677  | 0.991288  | -0.123588 |
| Frequencies -- | 71.8977   |   | 101.2198  |           | 193.7868  |
| Frequencies -- | 230.0141  |   | 257.3903  |           | 306.0574  |
| Frequencies -- | 344.3281  |   | 382.5171  |           | 385.3521  |
| Frequencies -- | 440.0113  |   | 498.3458  |           | 549.7680  |
| Frequencies -- | 619.0751  |   | 647.3337  |           | 662.0985  |
| Frequencies -- | 746.9057  |   | 790.1960  |           | 887.5937  |
| Frequencies -- | 897.4436  |   | 942.8491  |           | 991.9983  |
| Frequencies -- | 1031.1810 |   | 1034.3584 |           | 1118.5892 |
| Frequencies -- | 1187.8736 |   | 1248.3406 |           | 1311.2663 |
| Frequencies -- | 1332.2939 |   | 1427.3591 |           | 1462.2944 |
| Frequencies -- | 1504.4116 |   | 1511.8488 |           | 1710.5720 |
| Frequencies -- | 3084.0662 |   | 3162.3347 |           | 3178.0671 |
| Frequencies -- | 3181.2154 |   | 3204.8200 |           | 3266.0589 |

SOZ = SOZ'

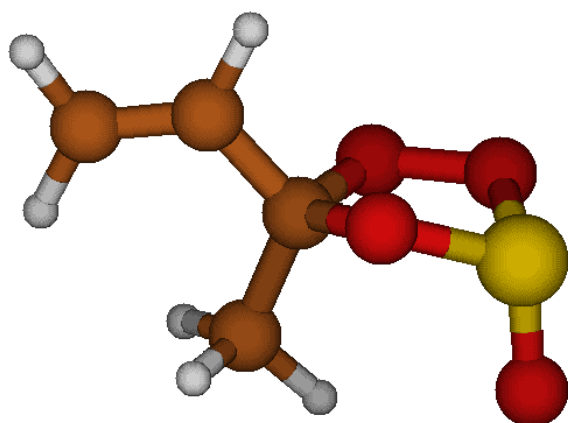

|                |           |   |           |           |           |
|----------------|-----------|---|-----------|-----------|-----------|
| 1              | 6         | 0 | -0.771401 | 0.079359  | 0.081826  |
| 2              | 16        | 0 | 1.705098  | -0.200138 | -0.494836 |
| 3              | 8         | 0 | 1.146660  | -1.153744 | 0.762592  |
| 4              | 8         | 0 | -0.241030 | -0.812745 | 1.099287  |
| 5              | 8         | 0 | 0.159946  | 0.018694  | -1.016757 |
| 6              | 8         | 0 | 2.235585  | 1.049767  | 0.028730  |
| 7              | 6         | 0 | -0.874703 | 1.481217  | 0.641405  |
| 8              | 6         | 0 | -2.039774 | -0.553881 | -0.401717 |
| 9              | 1         | 0 | -1.569386 | 1.490702  | 1.477379  |
| 10             | 1         | 0 | -1.224381 | 2.165439  | -0.127842 |
| 11             | 1         | 0 | 0.101665  | 1.804527  | 0.986063  |
| 12             | 6         | 0 | -3.244508 | -0.003603 | -0.322052 |
| 13             | 1         | 0 | -1.897695 | -1.539807 | -0.822492 |
| 14             | 1         | 0 | -3.403850 | 0.977072  | 0.099911  |
| 15             | 1         | 0 | -4.114903 | -0.530051 | -0.683232 |
| Frequencies -- | -128.6963 |   | 82.5424   |           | 136.2609  |
| Frequencies -- | 248.9685  |   | 255.3495  |           | 295.3057  |
| Frequencies -- | 352.5496  |   | 372.8959  |           | 388.6703  |
| Frequencies -- | 411.7868  |   | 507.3882  |           | 598.7262  |
| Frequencies -- | 641.4672  |   | 652.5990  |           | 689.8590  |
| Frequencies -- | 745.2134  |   | 802.6924  |           | 849.4882  |
| Frequencies -- | 886.9147  |   | 941.7272  |           | 985.4665  |
| Frequencies -- | 1029.0111 |   | 1034.8454 |           | 1116.2608 |
| Frequencies -- | 1182.5865 |   | 1244.6799 |           | 1290.5690 |
| Frequencies -- | 1331.4208 |   | 1424.6902 |           | 1460.5608 |
| Frequencies -- | 1503.5271 |   | 1509.7037 |           | 1708.3981 |
| Frequencies -- | 3080.4549 |   | 3158.4946 |           | 3176.8937 |
| Frequencies -- | 3180.8852 |   | 3200.6762 |           | 3264.4480 |

SOZ'

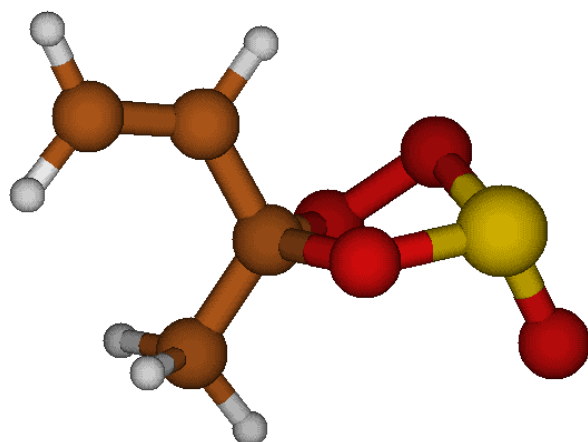

|                |           |   |           |           |           |
|----------------|-----------|---|-----------|-----------|-----------|
| 1              | 6         | 0 | -0.787569 | 0.291556  | 0.096676  |
| 2              | 16        | 0 | 1.642177  | -0.408203 | -0.454036 |
| 3              | 8         | 0 | 0.871613  | -1.005404 | 0.942438  |
| 4              | 8         | 0 | -0.060773 | 0.059587  | 1.299220  |
| 5              | 8         | 0 | 0.210895  | 0.230810  | -0.966674 |
| 6              | 8         | 0 | 2.525421  | 0.692026  | -0.113254 |
| 7              | 6         | 0 | -1.313489 | 1.702952  | 0.193916  |
| 8              | 6         | 0 | -1.782312 | -0.801371 | -0.150581 |
| 9              | 1         | 0 | -2.019966 | 1.785733  | 1.015723  |
| 10             | 1         | 0 | -1.808761 | 1.973030  | -0.734222 |
| 11             | 1         | 0 | -0.476298 | 2.373112  | 0.361054  |
| 12             | 6         | 0 | -3.072512 | -0.614991 | -0.399116 |
| 13             | 1         | 0 | -1.366201 | -1.798473 | -0.105191 |
| 14             | 1         | 0 | -3.515240 | 0.368479  | -0.451773 |
| 15             | 1         | 0 | -3.730327 | -1.455672 | -0.560219 |
| Frequencies -- | 68.6685   |   | 88.5478   |           | 179.9058  |
| Frequencies -- | 230.5303  |   | 262.9262  |           | 297.1211  |
| Frequencies -- | 333.8729  |   | 369.9032  |           | 424.6329  |
| Frequencies -- | 466.1481  |   | 483.9051  |           | 554.3839  |
| Frequencies -- | 635.3846  |   | 662.1696  |           | 692.3499  |
| Frequencies -- | 763.4537  |   | 782.9097  |           | 848.0047  |
| Frequencies -- | 854.4974  |   | 945.3141  |           | 979.8726  |
| Frequencies -- | 1032.5001 |   | 1037.4845 |           | 1124.6301 |
| Frequencies -- | 1189.4902 |   | 1259.8852 |           | 1302.3925 |
| Frequencies -- | 1337.6638 |   | 1419.4249 |           | 1465.4764 |
| Frequencies -- | 1500.2241 |   | 1507.3283 |           | 1710.2486 |
| Frequencies -- | 3084.2149 |   | 3166.5541 |           | 3173.4626 |
| Frequencies -- | 3177.3086 |   | 3200.0141 |           | 3259.5848 |

SOZ' = MVK + SO<sub>3</sub>

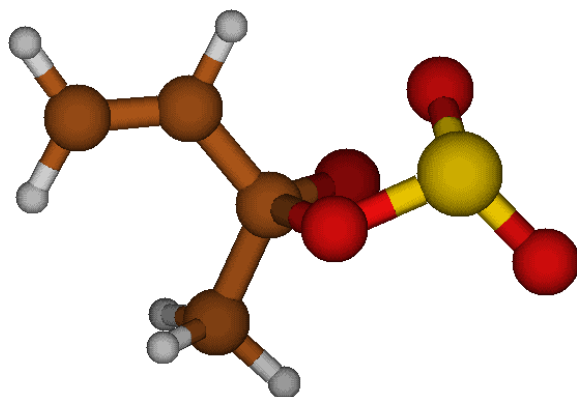

|                |           |   |           |           |           |
|----------------|-----------|---|-----------|-----------|-----------|
| 1              | 8         | 0 | -0.186754 | 0.192973  | 1.396827  |
| 2              | 6         | 0 | -0.837553 | 0.295080  | 0.233370  |
| 3              | 8         | 0 | 0.224710  | 0.295761  | -0.911001 |
| 4              | 16        | 0 | 1.598019  | -0.362493 | -0.406400 |
| 5              | 8         | 0 | 1.045713  | -1.107803 | 0.804439  |
| 6              | 8         | 0 | 2.614303  | 0.656553  | -0.204869 |
| 7              | 6         | 0 | -1.415870 | 1.711510  | 0.133287  |
| 8              | 6         | 0 | -1.756056 | -0.847164 | -0.075644 |
| 9              | 6         | 0 | -3.007592 | -0.729336 | -0.501939 |
| 10             | 1         | 0 | -0.625675 | 2.425789  | 0.337169  |
| 11             | 1         | 0 | -2.211042 | 1.818450  | 0.864416  |
| 12             | 1         | 0 | -1.806436 | 1.870237  | -0.867181 |
| 13             | 1         | 0 | -1.321978 | -1.819286 | 0.113177  |
| 14             | 1         | 0 | -3.468637 | 0.228894  | -0.689570 |
| 15             | 1         | 0 | -3.615890 | -1.604613 | -0.673224 |
| Frequencies -- | -473.4865 |   | 74.2209   |           | 96.4266   |
| Frequencies -- | 160.8422  |   | 250.7272  |           | 261.1170  |
| Frequencies -- | 285.6100  |   | 321.8525  |           | 356.5760  |
| Frequencies -- | 410.8617  |   | 439.1278  |           | 484.1888  |
| Frequencies -- | 550.4309  |   | 559.5446  |           | 620.4054  |
| Frequencies -- | 714.5322  |   | 776.5328  |           | 833.6393  |
| Frequencies -- | 896.7259  |   | 977.2618  |           | 981.8632  |
| Frequencies -- | 1002.5179 |   | 1033.9802 |           | 1076.8321 |
| Frequencies -- | 1200.8184 |   | 1252.2579 |           | 1281.5727 |
| Frequencies -- | 1329.7380 |   | 1395.5760 |           | 1463.9511 |
| Frequencies -- | 1494.6021 |   | 1505.6603 |           | 1704.4290 |
| Frequencies -- | 3087.7173 |   | 3173.3040 |           | 3176.9059 |
| Frequencies -- | 3186.7751 |   | 3202.0907 |           | 3259.1691 |

*syn-cis; endo*  
*syn-cis...SO<sub>2</sub>*

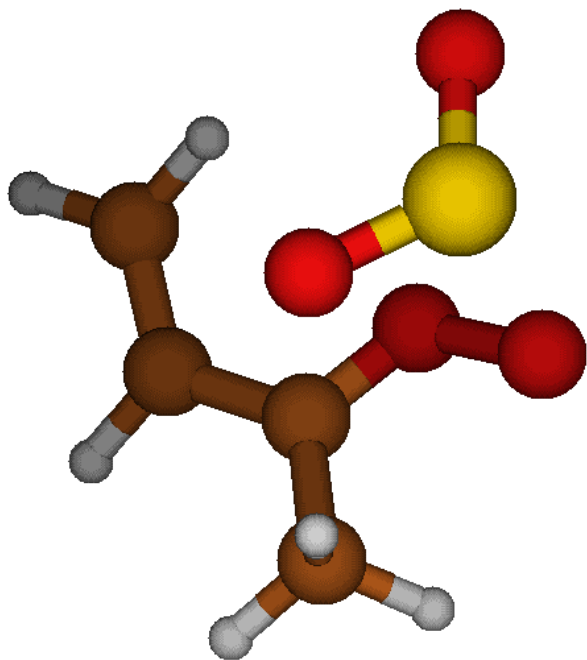

|                |           |   |           |           |           |
|----------------|-----------|---|-----------|-----------|-----------|
| 1              | 6         | 0 | -1.396102 | -0.416273 | -0.127917 |
| 2              | 8         | 0 | -0.540530 | -0.188874 | -1.048961 |
| 3              | 8         | 0 | 0.480149  | -1.133281 | -1.173323 |
| 4              | 6         | 0 | -1.486764 | -1.735925 | 0.522970  |
| 5              | 6         | 0 | -2.294559 | 0.687029  | 0.150232  |
| 6              | 1         | 0 | -1.295027 | -2.510968 | -0.217227 |
| 7              | 1         | 0 | -0.699473 | -1.807794 | 1.271641  |
| 8              | 1         | 0 | -2.454860 | -1.855646 | 0.999713  |
| 9              | 16        | 0 | 1.892903  | -0.070201 | 0.288799  |
| 10             | 8         | 0 | 0.873203  | 0.007544  | 1.351876  |
| 11             | 8         | 0 | 2.114468  | 1.181301  | -0.434241 |
| 12             | 1         | 0 | -3.266453 | 0.432495  | 0.547220  |
| 13             | 6         | 0 | -1.907238 | 1.958682  | 0.003600  |
| 14             | 1         | 0 | -0.902133 | 2.198807  | -0.311735 |
| 15             | 1         | 0 | -2.578839 | 2.771724  | 0.233492  |
| Frequencies -- | 43.2671   |   | 70.2224   |           | 104.1838  |
| Frequencies -- | 134.6299  |   | 158.8260  |           | 169.6804  |
| Frequencies -- | 205.9363  |   | 241.2487  |           | 308.6136  |
| Frequencies -- | 341.5754  |   | 361.2506  |           | 442.9580  |
| Frequencies -- | 515.1565  |   | 532.0978  |           | 617.5337  |
| Frequencies -- | 666.9368  |   | 812.7348  |           | 929.5168  |
| Frequencies -- | 1006.0134 |   | 1027.1538 |           | 1033.5241 |
| Frequencies -- | 1036.5175 |   | 1101.2979 |           | 1105.6093 |
| Frequencies -- | 1263.0818 |   | 1284.9026 |           | 1343.2089 |
| Frequencies -- | 1395.4818 |   | 1453.2569 |           | 1458.6708 |
| Frequencies -- | 1498.2911 |   | 1514.5928 |           | 1672.4294 |
| Frequencies -- | 3069.0380 |   | 3138.0126 |           | 3171.8518 |
| Frequencies -- | 3173.9184 |   | 3210.2599 |           | 3273.9748 |

*syn-cis*...SO<sub>2</sub> = SOZ

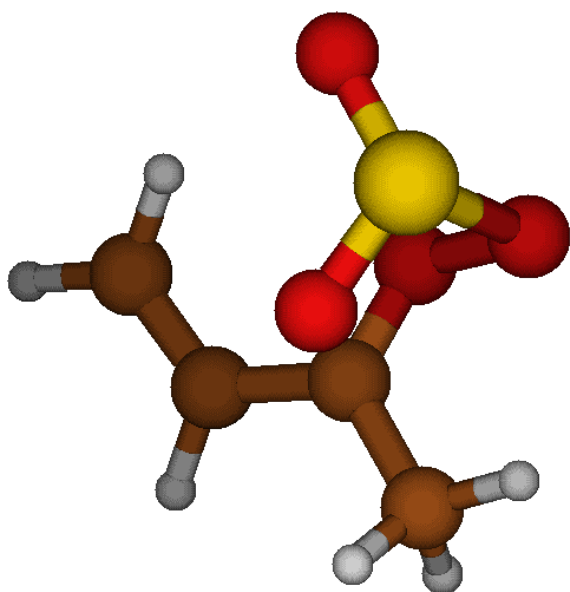

|                |           |   |           |           |           |
|----------------|-----------|---|-----------|-----------|-----------|
| 1              | 6         | 0 | 1.203998  | -0.416266 | 0.117429  |
| 2              | 8         | 0 | 0.439098  | -0.187720 | 1.137028  |
| 3              | 8         | 0 | -0.701695 | -1.011974 | 1.194873  |
| 4              | 6         | 0 | 1.398031  | -1.768751 | -0.454732 |
| 5              | 6         | 0 | 2.139276  | 0.664026  | -0.151845 |
| 6              | 1         | 0 | 0.568948  | -2.416370 | -0.206011 |
| 7              | 1         | 0 | 1.517635  | -1.701055 | -1.531027 |
| 8              | 1         | 0 | 2.323953  | -2.165313 | -0.027205 |
| 9              | 1         | 0 | 3.096366  | 0.383683  | -0.567964 |
| 10             | 6         | 0 | 1.799172  | 1.941646  | 0.037930  |
| 11             | 1         | 0 | 0.805490  | 2.204259  | 0.371847  |
| 12             | 1         | 0 | 2.495474  | 2.738171  | -0.176115 |
| 13             | 16        | 0 | -1.735547 | -0.070347 | -0.344503 |
| 14             | 8         | 0 | -0.546041 | -0.115784 | -1.253828 |
| 15             | 8         | 0 | -1.976610 | 1.260259  | 0.216405  |
| Frequencies -- | -129.5665 |   | 64.7575   |           | 104.4926  |
| Frequencies -- | 169.9394  |   | 190.3104  |           | 194.2593  |
| Frequencies -- | 237.0143  |   | 256.7082  |           | 349.0032  |
| Frequencies -- | 363.4854  |   | 432.7902  |           | 455.1087  |
| Frequencies -- | 525.1393  |   | 547.2784  |           | 612.8386  |
| Frequencies -- | 681.1048  |   | 809.8750  |           | 932.1484  |
| Frequencies -- | 981.2245  |   | 1010.1798 |           | 1027.1060 |
| Frequencies -- | 1032.5378 |   | 1066.4216 |           | 1094.6932 |
| Frequencies -- | 1229.5193 |   | 1292.0716 |           | 1346.1600 |
| Frequencies -- | 1409.7243 |   | 1420.0289 |           | 1477.7869 |
| Frequencies -- | 1490.4436 |   | 1497.8665 |           | 1675.8051 |
| Frequencies -- | 3043.4646 |   | 3150.8782 |           | 3171.6071 |
| Frequencies -- | 3206.2721 |   | 3219.4754 |           | 3272.1975 |

SOZ

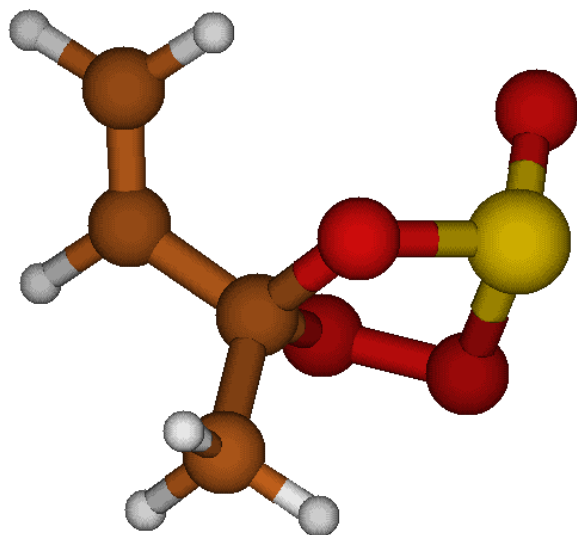

|                |           |   |           |           |           |
|----------------|-----------|---|-----------|-----------|-----------|
| 1              | 6         | 0 | 0.907295  | -0.405427 | -0.025360 |
| 2              | 8         | 0 | 0.190774  | -0.594452 | 1.193233  |
| 3              | 8         | 0 | -1.109741 | -1.094304 | 0.746435  |
| 4              | 6         | 0 | 1.394320  | -1.711856 | -0.615207 |
| 5              | 6         | 0 | 2.009227  | 0.558704  | 0.304050  |
| 6              | 1         | 0 | 0.561199  | -2.398470 | -0.735995 |
| 7              | 1         | 0 | 1.850396  | -1.525677 | -1.584498 |
| 8              | 1         | 0 | 2.132902  | -2.159123 | 0.046405  |
| 9              | 1         | 0 | 2.861998  | 0.119246  | 0.803097  |
| 10             | 6         | 0 | 1.966315  | 1.854067  | 0.022745  |
| 11             | 1         | 0 | 1.115177  | 2.290310  | -0.476584 |
| 12             | 1         | 0 | 2.787212  | 2.502629  | 0.288658  |
| 13             | 16        | 0 | -1.602317 | 0.056679  | -0.400700 |
| 14             | 8         | 0 | -0.045285 | 0.190147  | -0.937642 |
| 15             | 8         | 0 | -1.952593 | 1.310022  | 0.242067  |
| Frequencies -- | 44.9461   |   | 78.5191   |           | 189.8789  |
| Frequencies -- | 241.3992  |   | 251.7340  |           | 286.2888  |
| Frequencies -- | 331.3636  |   | 364.6086  |           | 421.6027  |
| Frequencies -- | 475.6638  |   | 546.6402  |           | 569.2323  |
| Frequencies -- | 607.3737  |   | 649.3898  |           | 679.1661  |
| Frequencies -- | 739.8702  |   | 801.4266  |           | 832.4554  |
| Frequencies -- | 896.7450  |   | 939.2530  |           | 997.2198  |
| Frequencies -- | 1018.4852 |   | 1045.0085 |           | 1137.7855 |
| Frequencies -- | 1181.3033 |   | 1254.2441 |           | 1271.6650 |
| Frequencies -- | 1332.7052 |   | 1418.0835 |           | 1457.5890 |
| Frequencies -- | 1498.1322 |   | 1501.3975 |           | 1705.1443 |
| Frequencies -- | 3074.1596 |   | 3153.8069 |           | 3164.8350 |
| Frequencies -- | 3177.4631 |   | 3197.9810 |           | 3273.2407 |



SOZ = SOZ'

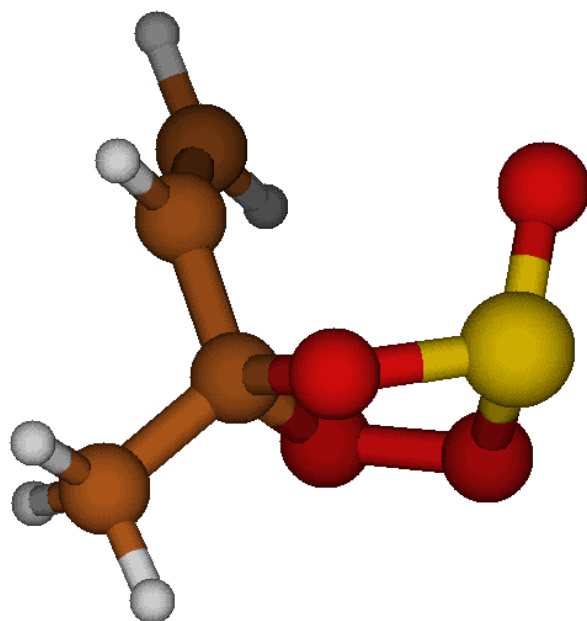

|                |           |   |           |           |           |
|----------------|-----------|---|-----------|-----------|-----------|
| 1              | 6         | 0 | 0.911327  | -0.378097 | -0.142746 |
| 2              | 16        | 0 | -1.635035 | -0.222030 | -0.250163 |
| 3              | 8         | 0 | -0.987060 | -0.576716 | 1.256376  |
| 4              | 8         | 0 | 0.467849  | -0.410597 | 1.230748  |
| 5              | 8         | 0 | -0.231095 | -0.716859 | -0.954211 |
| 6              | 6         | 0 | 1.938869  | -1.472741 | -0.335160 |
| 7              | 6         | 0 | 1.429591  | 0.987001  | -0.501228 |
| 8              | 1         | 0 | 2.772196  | -1.303076 | 0.342328  |
| 9              | 1         | 0 | 2.309369  | -1.456595 | -1.357764 |
| 10             | 1         | 0 | 1.484812  | -2.436986 | -0.124481 |
| 11             | 6         | 0 | 1.557798  | 1.990066  | 0.355837  |
| 12             | 1         | 0 | 1.720789  | 1.092907  | -1.538230 |
| 13             | 1         | 0 | 1.259404  | 1.885422  | 1.387439  |
| 14             | 1         | 0 | 1.950759  | 2.942716  | 0.035174  |
| 15             | 8         | 0 | -1.794981 | 1.213011  | -0.408173 |
| Frequencies -- | -120.1622 |   | 82.7292   |           | 128.5310  |
| Frequencies -- | 218.2618  |   | 255.5735  |           | 285.7301  |
| Frequencies -- | 300.8523  |   | 363.1113  |           | 385.3828  |
| Frequencies -- | 480.4077  |   | 531.5594  |           | 575.0967  |
| Frequencies -- | 612.1847  |   | 677.0763  |           | 712.8606  |
| Frequencies -- | 736.0692  |   | 797.6061  |           | 856.6195  |
| Frequencies -- | 879.9283  |   | 953.0834  |           | 987.1970  |
| Frequencies -- | 1024.8840 |   | 1041.6467 |           | 1139.7834 |
| Frequencies -- | 1177.9508 |   | 1237.2523 |           | 1262.4494 |
| Frequencies -- | 1326.4300 |   | 1414.6795 |           | 1454.6557 |
| Frequencies -- | 1493.6399 |   | 1496.7896 |           | 1707.8902 |
| Frequencies -- | 3072.5768 |   | 3154.7555 |           | 3165.7878 |
| Frequencies -- | 3175.5233 |   | 3189.8773 |           | 3271.0645 |

SOZ'

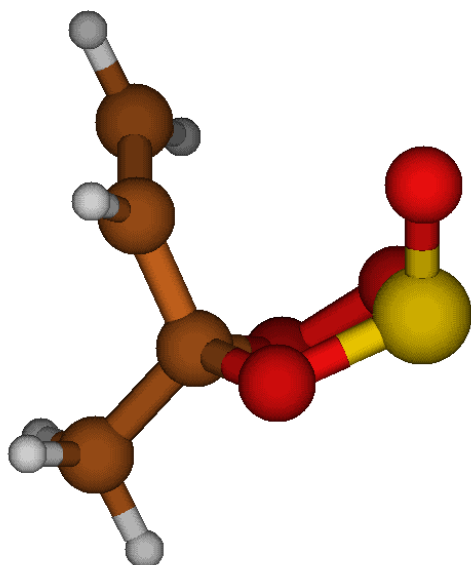

|                |           |   |           |           |           |
|----------------|-----------|---|-----------|-----------|-----------|
| 1              | 6         | 0 | 0.931326  | -0.385516 | -0.124795 |
| 2              | 16        | 0 | -1.628327 | -0.383650 | -0.049333 |
| 3              | 8         | 0 | -0.716347 | 0.154814  | 1.329453  |
| 4              | 8         | 0 | 0.616979  | -0.406876 | 1.249533  |
| 5              | 8         | 0 | -0.253763 | -0.953088 | -0.755124 |
| 6              | 6         | 0 | 2.071613  | -1.356405 | -0.329866 |
| 7              | 6         | 0 | 1.202454  | 0.985707  | -0.675468 |
| 8              | 1         | 0 | 2.937279  | -1.013712 | 0.231615  |
| 9              | 1         | 0 | 2.330764  | -1.389564 | -1.384874 |
| 10             | 1         | 0 | 1.776762  | -2.346517 | 0.005686  |
| 11             | 6         | 0 | 1.481012  | 2.041177  | 0.076343  |
| 12             | 1         | 0 | 1.178911  | 1.050211  | -1.754914 |
| 13             | 1         | 0 | 1.484456  | 1.975092  | 1.154018  |
| 14             | 1         | 0 | 1.692635  | 3.000023  | -0.371416 |
| 15             | 8         | 0 | -2.080119 | 0.849286  | -0.669873 |
| Frequencies -- | 77.6864   |   | 104.4866  |           | 171.3643  |
| Frequencies -- | 207.8023  |   | 252.7274  |           | 293.5452  |
| Frequencies -- | 303.9485  |   | 352.2568  |           | 386.0403  |
| Frequencies -- | 457.7828  |   | 519.8118  |           | 562.0009  |
| Frequencies -- | 605.7655  |   | 645.9559  |           | 707.9753  |
| Frequencies -- | 746.8007  |   | 796.8104  |           | 842.6741  |
| Frequencies -- | 899.6510  |   | 958.0061  |           | 982.9617  |
| Frequencies -- | 1024.1320 |   | 1053.8698 |           | 1129.8241 |
| Frequencies -- | 1204.2170 |   | 1251.8427 |           | 1269.6128 |
| Frequencies -- | 1325.1640 |   | 1415.0838 |           | 1456.9714 |
| Frequencies -- | 1495.4468 |   | 1496.9660 |           | 1708.3465 |
| Frequencies -- | 3077.5080 |   | 3161.0416 |           | 3169.5402 |
| Frequencies -- | 3174.5091 |   | 3195.2092 |           | 3266.9753 |

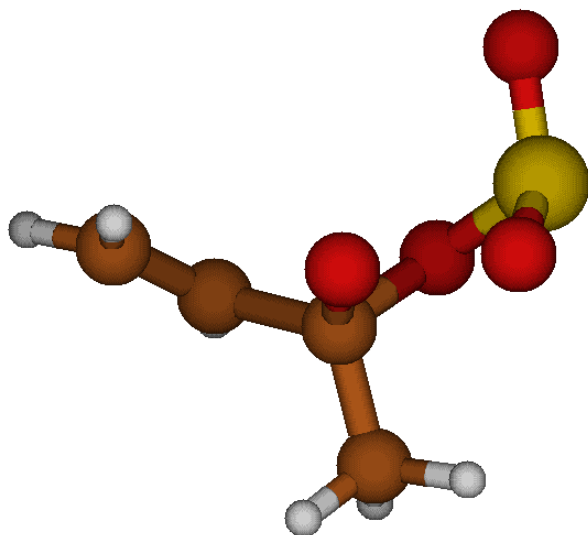

|                |           |   |           |           |           |
|----------------|-----------|---|-----------|-----------|-----------|
| 1              | 8         | 0 | 0.482112  | 0.096044  | 1.192693  |
| 2              | 6         | 0 | 0.888782  | 0.387026  | -0.046778 |
| 3              | 8         | 0 | -0.273751 | 0.037489  | -1.030527 |
| 4              | 16        | 0 | -1.672792 | -0.013135 | -0.247270 |
| 5              | 8         | 0 | -1.242972 | 0.775722  | 0.990566  |
| 6              | 8         | 0 | -2.128139 | -1.382450 | -0.084597 |
| 7              | 6         | 0 | 1.228913  | 1.838015  | -0.316405 |
| 8              | 6         | 0 | 1.959296  | -0.586127 | -0.497241 |
| 9              | 6         | 0 | 2.616486  | -1.396176 | 0.321589  |
| 10             | 1         | 0 | 0.385361  | 2.468266  | -0.049913 |
| 11             | 1         | 0 | 1.478920  | 1.987490  | -1.363823 |
| 12             | 1         | 0 | 2.085294  | 2.108879  | 0.297519  |
| 13             | 1         | 0 | 2.168133  | -0.546577 | -1.556916 |
| 14             | 1         | 0 | 2.402830  | -1.428247 | 1.378545  |
| 15             | 1         | 0 | 3.385258  | -2.050516 | -0.061156 |
| Frequencies -- | -503.0963 |   | 49.7067   |           | 114.2572  |
| Frequencies -- | 167.4532  |   | 238.4033  |           | 245.8125  |
| Frequencies -- | 278.7626  |   | 305.0201  |           | 349.8186  |
| Frequencies -- | 426.6553  |   | 438.4999  |           | 506.6686  |
| Frequencies -- | 559.1815  |   | 564.7677  |           | 620.5304  |
| Frequencies -- | 695.2147  |   | 773.8967  |           | 833.3841  |
| Frequencies -- | 884.3514  |   | 956.1887  |           | 987.0136  |
| Frequencies -- | 1017.9460 |   | 1054.3601 |           | 1085.3504 |
| Frequencies -- | 1208.7140 |   | 1238.4825 |           | 1259.3925 |
| Frequencies -- | 1335.8924 |   | 1413.3947 |           | 1449.7609 |
| Frequencies -- | 1493.8651 |   | 1498.2580 |           | 1691.5326 |
| Frequencies -- | 3073.4758 |   | 3153.3649 |           | 3166.4758 |
| Frequencies -- | 3176.1199 |   | 3203.1558 |           | 3271.4335 |

MVK

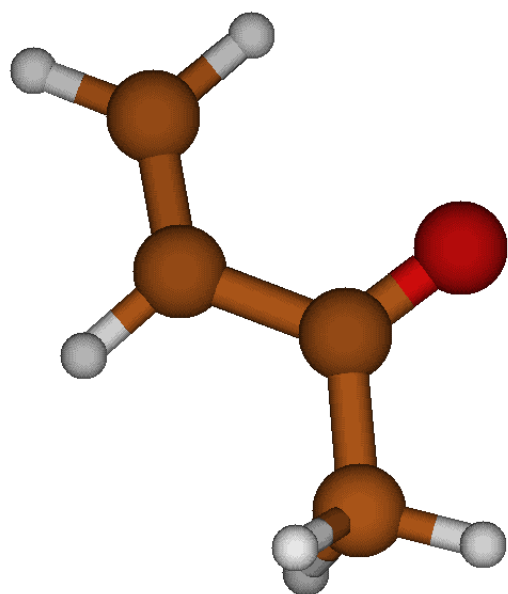

|                |           |   |           |           |           |
|----------------|-----------|---|-----------|-----------|-----------|
| 1              | 6         | 0 | -0.602979 | -1.916344 | 0.000000  |
| 2              | 6         | 0 | 0.344205  | -0.980834 | 0.000000  |
| 3              | 6         | 0 | 0.000000  | 0.471355  | 0.000000  |
| 4              | 8         | 0 | -1.152853 | 0.859147  | 0.000000  |
| 5              | 6         | 0 | 1.166490  | 1.427951  | 0.000000  |
| 6              | 1         | 0 | -1.644059 | -1.625329 | 0.000000  |
| 7              | 1         | 0 | -0.364261 | -2.969258 | 0.000000  |
| 8              | 1         | 0 | 1.392679  | -1.248799 | 0.000000  |
| 9              | 1         | 0 | 0.809026  | 2.452241  | 0.000000  |
| 10             | 1         | 0 | 1.791571  | 1.252604  | 0.876727  |
| 11             | 1         | 0 | 1.791571  | 1.252604  | -0.876727 |
| Frequencies -- | 95.1011   |   | 131.0806  |           | 269.1744  |
| Frequencies -- | 415.7426  |   | 462.4459  |           | 602.2285  |
| Frequencies -- | 687.4931  |   | 785.7875  |           | 967.0014  |
| Frequencies -- | 1013.9690 |   | 1033.2112 |           | 1051.5520 |
| Frequencies -- | 1087.8778 |   | 1208.6350 |           | 1333.8510 |
| Frequencies -- | 1393.9406 |   | 1447.6324 |           | 1477.1397 |
| Frequencies -- | 1488.2154 |   | 1670.7956 |           | 1760.3327 |
| Frequencies -- | 3051.0294 |   | 3111.7758 |           | 3165.6515 |
| Frequencies -- | 3172.4552 |   | 3186.9241 |           | 3262.9738 |

*syn-cis; exo*  
*syn-cis...SO<sub>2</sub>*

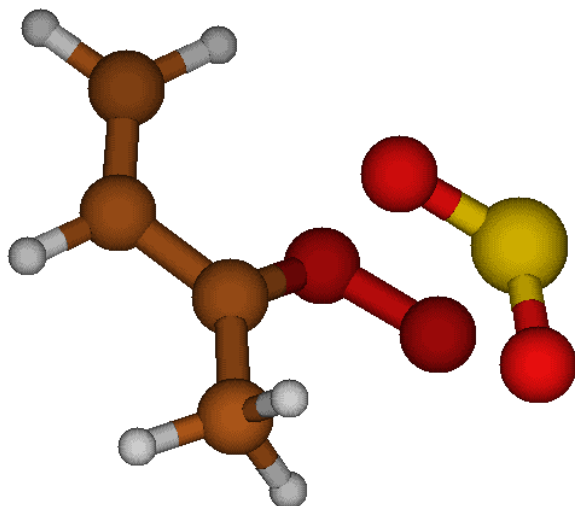

|                |           |   |           |           |           |
|----------------|-----------|---|-----------|-----------|-----------|
| 1              | 6         | 0 | -1.219190 | 0.620860  | 0.013608  |
| 2              | 8         | 0 | -0.754735 | 0.166576  | 1.114975  |
| 3              | 8         | 0 | 0.541528  | 0.573857  | 1.432524  |
| 4              | 6         | 0 | -0.568118 | 1.738745  | -0.697170 |
| 5              | 6         | 0 | -2.477938 | 0.038333  | -0.409795 |
| 6              | 1         | 0 | -0.118868 | 2.408720  | 0.034103  |
| 7              | 1         | 0 | 0.245201  | 1.360712  | -1.313128 |
| 8              | 1         | 0 | -1.291026 | 2.245408  | -1.329957 |
| 9              | 16        | 0 | 1.802481  | -0.662432 | 0.043243  |
| 10             | 8         | 0 | 0.644867  | -1.135470 | -0.741838 |
| 11             | 8         | 0 | 2.570187  | 0.423403  | -0.568268 |
| 12             | 1         | 0 | -3.085188 | 0.642949  | -1.067294 |
| 13             | 6         | 0 | -2.840666 | -1.203969 | -0.075669 |
| 14             | 1         | 0 | -2.194285 | -1.830054 | 0.520459  |
| 15             | 1         | 0 | -3.774832 | -1.619559 | -0.421066 |
| Frequencies -- | 56.1451   |   | 76.6191   |           | 93.8906   |
| Frequencies -- | 117.4857  |   | 161.1770  |           | 185.9439  |
| Frequencies -- | 212.7011  |   | 257.1847  |           | 316.8018  |
| Frequencies -- | 345.8488  |   | 363.2753  |           | 438.7743  |
| Frequencies -- | 507.8252  |   | 527.6101  |           | 618.6452  |
| Frequencies -- | 667.4510  |   | 811.7390  |           | 928.9049  |
| Frequencies -- | 1005.6513 |   | 1018.8100 |           | 1029.9406 |
| Frequencies -- | 1040.2637 |   | 1097.3132 |           | 1102.8004 |
| Frequencies -- | 1259.3446 |   | 1284.9025 |           | 1342.2884 |
| Frequencies -- | 1400.0391 |   | 1450.5955 |           | 1457.1662 |
| Frequencies -- | 1495.6403 |   | 1515.8685 |           | 1676.5034 |
| Frequencies -- | 3070.6281 |   | 3141.6053 |           | 3169.2440 |
| Frequencies -- | 3180.6319 |   | 3212.3966 |           | 3278.8832 |

*syn-cis*...SO<sub>2</sub> = SOZ

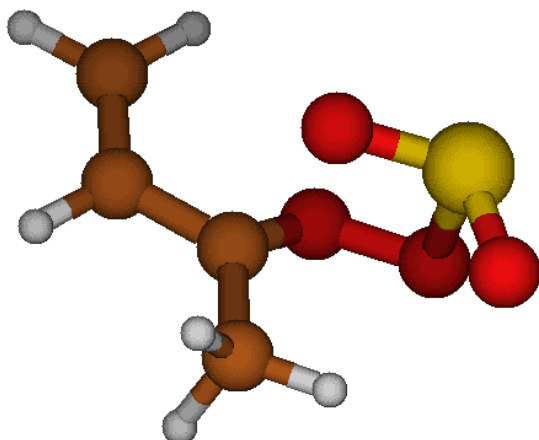

|                |           |   |           |           |           |
|----------------|-----------|---|-----------|-----------|-----------|
| 1              | 6         | 0 | -1.036423 | -0.569695 | -0.091739 |
| 2              | 8         | 0 | -0.683518 | 0.031185  | -1.183873 |
| 3              | 8         | 0 | 0.677129  | -0.108934 | -1.494635 |
| 4              | 6         | 0 | -0.408801 | -1.826235 | 0.386972  |
| 5              | 6         | 0 | -2.346039 | -0.169360 | 0.401100  |
| 6              | 1         | 0 | 0.593102  | -1.950930 | 0.001190  |
| 7              | 1         | 0 | -0.390329 | -1.835253 | 1.472045  |
| 8              | 1         | 0 | -1.049273 | -2.646082 | 0.046857  |
| 9              | 16        | 0 | 1.645514  | 0.703425  | 0.136307  |
| 10             | 8         | 0 | 0.388215  | 0.749438  | 0.954793  |
| 11             | 8         | 0 | 2.541390  | -0.410744 | 0.448493  |
| 12             | 6         | 0 | -2.854513 | 1.045537  | 0.185349  |
| 13             | 1         | 0 | -2.298019 | 1.791904  | -0.360689 |
| 14             | 1         | 0 | -3.824660 | 1.317313  | 0.572167  |
| 15             | 1         | 0 | -2.870130 | -0.900793 | 0.999201  |
| Frequencies -- | -123.7674 |   | 74.4108   |           | 107.6976  |
| Frequencies -- | 160.6666  |   | 169.4768  |           | 209.1505  |
| Frequencies -- | 246.9406  |   | 288.5004  |           | 335.6721  |
| Frequencies -- | 389.0692  |   | 417.0246  |           | 450.8684  |
| Frequencies -- | 504.2118  |   | 535.0754  |           | 615.6071  |
| Frequencies -- | 682.2739  |   | 807.3926  |           | 938.8246  |
| Frequencies -- | 991.0806  |   | 1013.9062 |           | 1017.7537 |
| Frequencies -- | 1020.2132 |   | 1064.8532 |           | 1092.7112 |
| Frequencies -- | 1234.3351 |   | 1293.9499 |           | 1343.9756 |
| Frequencies -- | 1415.3087 |   | 1421.3805 |           | 1475.7465 |
| Frequencies -- | 1489.8036 |   | 1501.7213 |           | 1682.0705 |
| Frequencies -- | 3038.9938 |   | 3149.7618 |           | 3180.8647 |
| Frequencies -- | 3208.7517 |   | 3221.1247 |           | 3278.1294 |

SOZ

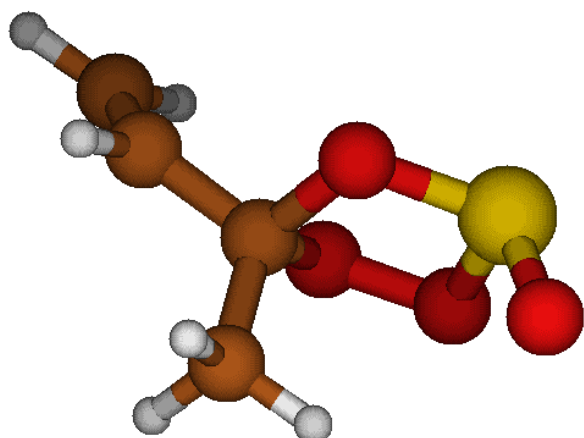

|                |           |   |           |           |           |
|----------------|-----------|---|-----------|-----------|-----------|
| 1              | 6         | 0 | -0.779585 | 0.384611  | 0.040320  |
| 2              | 8         | 0 | -0.589124 | -0.641560 | 0.992638  |
| 3              | 8         | 0 | 0.843265  | -0.732371 | 1.142240  |
| 4              | 6         | 0 | -0.464132 | 1.764846  | 0.580380  |
| 5              | 6         | 0 | -2.165273 | 0.268516  | -0.515729 |
| 6              | 1         | 0 | 0.536772  | 1.794889  | 0.998165  |
| 7              | 1         | 0 | -0.529988 | 2.491539  | -0.225891 |
| 8              | 1         | 0 | -1.189834 | 2.019051  | 1.349825  |
| 9              | 1         | 0 | -2.461803 | 1.095351  | -1.146347 |
| 10             | 6         | 0 | -2.994644 | -0.736625 | -0.265359 |
| 11             | 1         | 0 | -2.708221 | -1.564766 | 0.364084  |
| 12             | 1         | 0 | -3.987500 | -0.746076 | -0.688885 |
| 13             | 16        | 0 | 1.572727  | -0.539794 | -0.428120 |
| 14             | 8         | 0 | 0.157383  | 0.030750  | -1.030284 |
| 15             | 8         | 0 | 2.538319  | 0.525509  | -0.209432 |
| Frequencies -- | 36.1557   |   | 105.3336  |           | 175.9085  |
| Frequencies -- | 231.8567  |   | 241.0284  |           | 273.8856  |
| Frequencies -- | 324.7940  |   | 362.5611  |           | 405.7042  |
| Frequencies -- | 455.2395  |   | 529.9198  |           | 539.6025  |
| Frequencies -- | 605.7772  |   | 641.8940  |           | 670.6488  |
| Frequencies -- | 755.3290  |   | 786.1635  |           | 886.0549  |
| Frequencies -- | 915.8021  |   | 955.1147  |           | 994.7821  |
| Frequencies -- | 1024.3631 |   | 1050.3633 |           | 1112.5466 |
| Frequencies -- | 1199.6396 |   | 1249.0329 |           | 1289.5320 |
| Frequencies -- | 1338.1200 |   | 1424.4544 |           | 1463.0970 |
| Frequencies -- | 1501.1459 |   | 1504.3566 |           | 1706.9609 |
| Frequencies -- | 3076.6809 |   | 3152.9606 |           | 3177.4554 |
| Frequencies -- | 3178.1646 |   | 3198.5264 |           | 3271.0558 |

SOZ = SOZ'

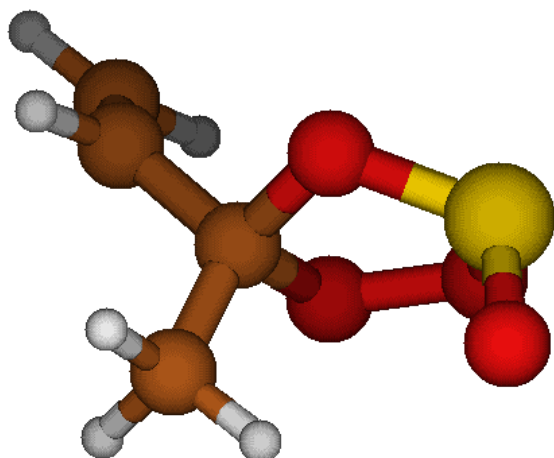

|                |           |   |           |           |           |
|----------------|-----------|---|-----------|-----------|-----------|
| 1              | 6         | 0 | -0.750870 | 0.425265  | 0.042461  |
| 2              | 16        | 0 | 1.596200  | -0.450413 | -0.467304 |
| 3              | 8         | 0 | 0.780782  | -1.214376 | 0.788980  |
| 4              | 8         | 0 | -0.509122 | -0.571852 | 1.051037  |
| 5              | 8         | 0 | 0.175153  | 0.143042  | -1.032326 |
| 6              | 8         | 0 | 2.414777  | 0.625546  | 0.070978  |
| 7              | 6         | 0 | -0.518499 | 1.811236  | 0.613785  |
| 8              | 6         | 0 | -2.134715 | 0.245429  | -0.511245 |
| 9              | 1         | 0 | -1.237852 | 1.990770  | 1.409681  |
| 10             | 1         | 0 | -0.659901 | 2.557137  | -0.165752 |
| 11             | 1         | 0 | 0.489889  | 1.892948  | 1.006593  |
| 12             | 6         | 0 | -2.933819 | -0.771690 | -0.217300 |
| 13             | 1         | 0 | -2.453715 | 1.035289  | -1.178297 |
| 14             | 1         | 0 | -2.620342 | -1.555008 | 0.454932  |
| 15             | 1         | 0 | -3.922574 | -0.834843 | -0.645858 |
| Frequencies -- | -133.2936 |   | 72.1887   |           | 142.1014  |
| Frequencies -- | 216.8127  |   | 248.0823  |           | 275.0878  |
| Frequencies -- | 326.4457  |   | 358.3408  |           | 391.6093  |
| Frequencies -- | 462.0406  |   | 536.0663  |           | 585.6902  |
| Frequencies -- | 610.0290  |   | 674.8926  |           | 684.2602  |
| Frequencies -- | 752.9529  |   | 804.1265  |           | 863.5861  |
| Frequencies -- | 898.1980  |   | 950.8904  |           | 996.1242  |
| Frequencies -- | 1023.8946 |   | 1042.0366 |           | 1128.0166 |
| Frequencies -- | 1170.1279 |   | 1247.7673 |           | 1266.3849 |
| Frequencies -- | 1331.6613 |   | 1422.3919 |           | 1455.2068 |
| Frequencies -- | 1499.6002 |   | 1502.1347 |           | 1705.9511 |
| Frequencies -- | 3072.7861 |   | 3149.2641 |           | 3175.7037 |
| Frequencies -- | 3176.5065 |   | 3193.3570 |           | 3272.4330 |



SOZ'

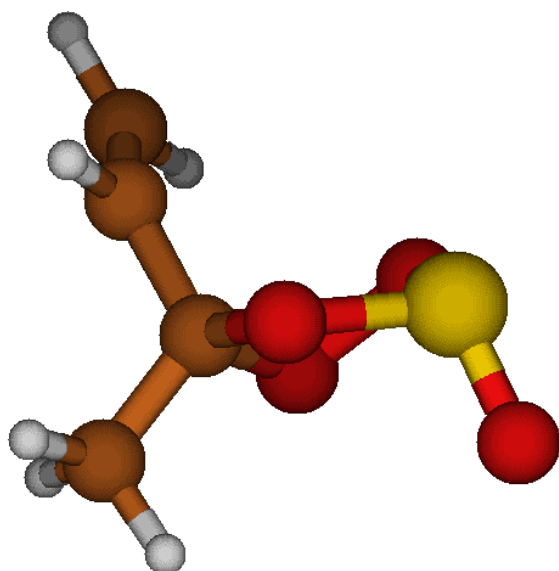

|                |           |   |           |           |           |
|----------------|-----------|---|-----------|-----------|-----------|
| 1              | 6         | 0 | -0.791668 | 0.527932  | -0.012448 |
| 2              | 16        | 0 | 1.563227  | -0.448364 | -0.429741 |
| 3              | 8         | 0 | 0.524135  | -1.160350 | 0.710682  |
| 4              | 8         | 0 | -0.308209 | -0.052998 | 1.180502  |
| 5              | 8         | 0 | 0.345890  | 0.554797  | -0.921788 |
| 6              | 8         | 0 | 2.562073  | 0.372741  | 0.229342  |
| 7              | 6         | 0 | -1.172831 | 1.952046  | 0.329694  |
| 8              | 6         | 0 | -1.891837 | -0.256105 | -0.667690 |
| 9              | 1         | 0 | -1.977449 | 1.947522  | 1.061019  |
| 10             | 1         | 0 | -1.519975 | 2.454752  | -0.569402 |
| 11             | 1         | 0 | -0.306641 | 2.472784  | 0.727433  |
| 12             | 6         | 0 | -2.547812 | -1.247738 | -0.080676 |
| 13             | 1         | 0 | -2.131355 | 0.062059  | -1.673848 |
| 14             | 1         | 0 | -2.299481 | -1.566149 | 0.920738  |
| 15             | 1         | 0 | -3.342954 | -1.767477 | -0.593274 |
| Frequencies -- | 68.2866   |   | 103.6043  |           | 160.2137  |
| Frequencies -- | 218.1171  |   | 272.8290  |           | 299.2199  |
| Frequencies -- | 313.5158  |   | 356.4622  |           | 422.0825  |
| Frequencies -- | 454.8566  |   | 532.9197  |           | 584.1393  |
| Frequencies -- | 609.8676  |   | 658.9598  |           | 705.9982  |
| Frequencies -- | 745.0954  |   | 793.4774  |           | 843.6220  |
| Frequencies -- | 863.4891  |   | 954.1695  |           | 985.1935  |
| Frequencies -- | 1028.9074 |   | 1051.8352 |           | 1130.4946 |
| Frequencies -- | 1191.6050 |   | 1260.8896 |           | 1267.7118 |
| Frequencies -- | 1324.8389 |   | 1414.8872 |           | 1458.2459 |
| Frequencies -- | 1496.0492 |   | 1497.6730 |           | 1708.5752 |
| Frequencies -- | 3076.6143 |   | 3159.2269 |           | 3170.8591 |
| Frequencies -- | 3172.5961 |   | 3190.7577 |           | 3265.5691 |

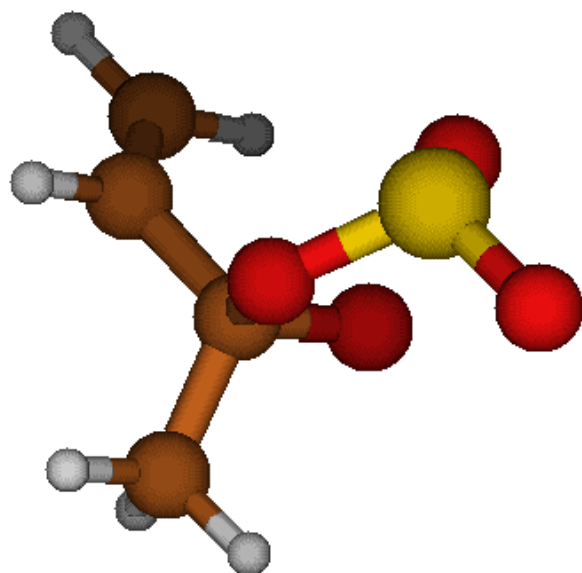

|                |           |   |           |           |           |
|----------------|-----------|---|-----------|-----------|-----------|
| 1              | 8         | 0 | -0.447442 | 0.071849  | 1.266523  |
| 2              | 6         | 0 | -0.857914 | 0.503795  | 0.074448  |
| 3              | 8         | 0 | 0.358966  | 0.598592  | -0.862650 |
| 4              | 16        | 0 | 1.532092  | -0.393748 | -0.366779 |
| 5              | 8         | 0 | 0.697451  | -1.262461 | 0.565033  |
| 6              | 8         | 0 | 2.637288  | 0.376643  | 0.177886  |
| 7              | 6         | 0 | -1.269315 | 1.981693  | 0.222449  |
| 8              | 6         | 0 | -1.871802 | -0.330398 | -0.652632 |
| 9              | 6         | 0 | -2.473618 | -1.370723 | -0.092318 |
| 10             | 1         | 0 | -0.455653 | 2.540364  | 0.673219  |
| 11             | 1         | 0 | -2.154854 | 2.027636  | 0.848700  |
| 12             | 1         | 0 | -1.496560 | 2.379623  | -0.762650 |
| 13             | 1         | 0 | -2.097241 | -0.016501 | -1.662953 |
| 14             | 1         | 0 | -2.231097 | -1.669281 | 0.916754  |
| 15             | 1         | 0 | -3.212284 | -1.945054 | -0.630622 |
| Frequencies -- | -447.2184 |   | 81.6922   |           | 108.8363  |
| Frequencies -- | 148.0682  |   | 239.3886  |           | 274.9905  |
| Frequencies -- | 288.8271  |   | 313.4491  |           | 344.0712  |
| Frequencies -- | 412.0518  |   | 448.3199  |           | 506.0042  |
| Frequencies -- | 554.9954  |   | 578.1282  |           | 651.6463  |
| Frequencies -- | 703.5862  |   | 762.4105  |           | 837.8981  |
| Frequencies -- | 897.4024  |   | 991.5857  |           | 993.4577  |
| Frequencies -- | 1027.1804 |   | 1050.9033 |           | 1058.3022 |
| Frequencies -- | 1103.8862 |   | 1253.0342 |           | 1297.1832 |
| Frequencies -- | 1322.7889 |   | 1394.3247 |           | 1451.2759 |
| Frequencies -- | 1489.4554 |   | 1498.5584 |           | 1702.4875 |
| Frequencies -- | 3081.3797 |   | 3170.8131 |           | 3172.1865 |
| Frequencies -- | 3184.0891 |   | 3193.7063 |           | 3266.4647 |

**Endo**

*syn-trans...SO<sub>2</sub> = syn-cis...SO<sub>2</sub>*  
geometry a

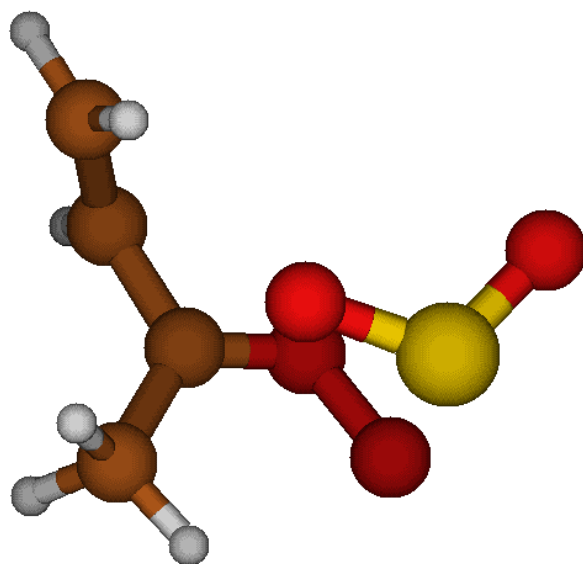

|                |           |   |           |           |           |
|----------------|-----------|---|-----------|-----------|-----------|
| 1              | 6         | 0 | -1.273420 | -0.513003 | -0.143486 |
| 2              | 8         | 0 | -0.402685 | -0.696295 | -1.053176 |
| 3              | 8         | 0 | 0.708753  | -1.471228 | -0.714010 |
| 4              | 6         | 0 | -1.360321 | -1.322892 | 1.087101  |
| 5              | 6         | 0 | -2.326425 | 0.451536  | -0.515511 |
| 6              | 1         | 0 | -0.527774 | -2.010361 | 1.157333  |
| 7              | 1         | 0 | -1.386183 | -0.659688 | 1.947609  |
| 8              | 1         | 0 | -2.312399 | -1.858843 | 1.054826  |
| 9              | 16        | 0 | 1.845490  | 0.149620  | 0.377155  |
| 10             | 8         | 0 | 0.621330  | 0.671981  | 1.032206  |
| 11             | 8         | 0 | 2.349667  | 0.968348  | -0.720124 |
| 12             | 6         | 0 | -2.334332 | 1.690946  | -0.037388 |
| 13             | 1         | 0 | -3.086395 | 0.093790  | -1.199168 |
| 14             | 1         | 0 | -1.550377 | 2.037002  | 0.619790  |
| 15             | 1         | 0 | -3.114234 | 2.382208  | -0.318343 |
| Frequencies -- | -137.3412 |   | 49.2487   |           | 83.9355   |
| Frequencies -- | 113.8335  |   | 155.7416  |           | 165.5789  |
| Frequencies -- | 205.5293  |   | 252.0622  |           | 285.1036  |
| Frequencies -- | 345.5625  |   | 375.5006  |           | 405.4768  |
| Frequencies -- | 526.2842  |   | 543.5276  |           | 605.0432  |
| Frequencies -- | 661.5901  |   | 806.8491  |           | 923.8679  |
| Frequencies -- | 990.9652  |   | 997.9811  |           | 1008.8129 |
| Frequencies -- | 1015.0531 |   | 1081.7154 |           | 1103.3945 |
| Frequencies -- | 1262.6065 |   | 1301.3353 |           | 1328.7103 |
| Frequencies -- | 1402.7698 |   | 1428.1997 |           | 1465.8226 |
| Frequencies -- | 1486.0751 |   | 1525.4642 |           | 1687.5889 |
| Frequencies -- | 3052.0485 |   | 3138.4154 |           | 3170.8435 |
| Frequencies -- | 3180.9613 |   | 3210.2552 |           | 3272.6398 |

*syn-trans...SO<sub>2</sub> = syn-cis...SO<sub>2</sub>*  
 geometry b

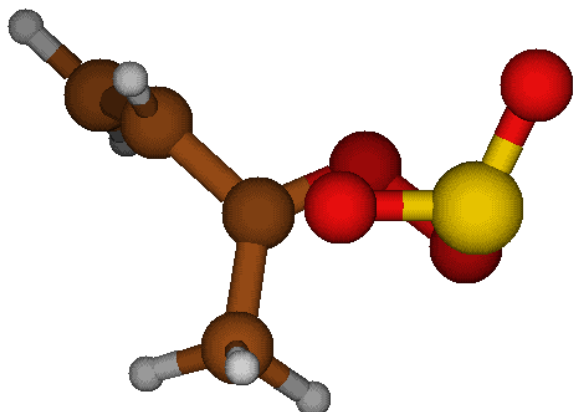

|                |           |   |           |           |           |
|----------------|-----------|---|-----------|-----------|-----------|
| 1              | 6         | 0 | -1.266771 | 0.268995  | 0.029727  |
| 2              | 8         | 0 | -0.501188 | -0.085406 | 0.978838  |
| 3              | 8         | 0 | 0.512342  | 0.808108  | 1.321553  |
| 4              | 6         | 0 | -1.258435 | 1.637503  | -0.517744 |
| 5              | 6         | 0 | -2.197186 | -0.783617 | -0.419262 |
| 6              | 1         | 0 | -0.930194 | 2.326887  | 0.256834  |
| 7              | 1         | 0 | -0.527677 | 1.682586  | -1.325353 |
| 8              | 1         | 0 | -2.240873 | 1.881066  | -0.910803 |
| 9              | 16        | 0 | 2.075935  | 0.063173  | -0.234613 |
| 10             | 8         | 0 | 1.056567  | -0.104028 | -1.290300 |
| 11             | 8         | 0 | 2.545248  | -1.172954 | 0.380938  |
| 12             | 6         | 0 | -3.405966 | -0.954173 | 0.102755  |
| 13             | 1         | 0 | -1.818610 | -1.413450 | -1.214539 |
| 14             | 1         | 0 | -3.776151 | -0.327131 | 0.901211  |
| 15             | 1         | 0 | -4.055059 | -1.738731 | -0.254629 |
| Frequencies -- | -143.2147 |   | 37.3977   |           | 47.3685   |
| Frequencies -- | 80.0180   |   | 139.0395  |           | 155.3255  |
| Frequencies -- | 192.9941  |   | 240.4993  |           | 277.9177  |
| Frequencies -- | 323.9631  |   | 355.2652  |           | 412.9535  |
| Frequencies -- | 516.4126  |   | 529.0533  |           | 617.9783  |
| Frequencies -- | 669.6472  |   | 798.8716  |           | 918.1594  |
| Frequencies -- | 988.8932  |   | 993.2423  |           | 1008.6899 |
| Frequencies -- | 1029.3298 |   | 1087.6807 |           | 1105.8856 |
| Frequencies -- | 1273.5181 |   | 1293.3621 |           | 1315.8431 |
| Frequencies -- | 1390.4512 |   | 1444.4492 |           | 1465.9561 |
| Frequencies -- | 1487.7166 |   | 1526.5271 |           | 1696.0014 |
| Frequencies -- | 3066.8804 |   | 3135.4638 |           | 3169.9656 |
| Frequencies -- | 3174.7734 |   | 3185.5434 |           | 3263.7766 |

SOZ; cis = trans  
geometry a

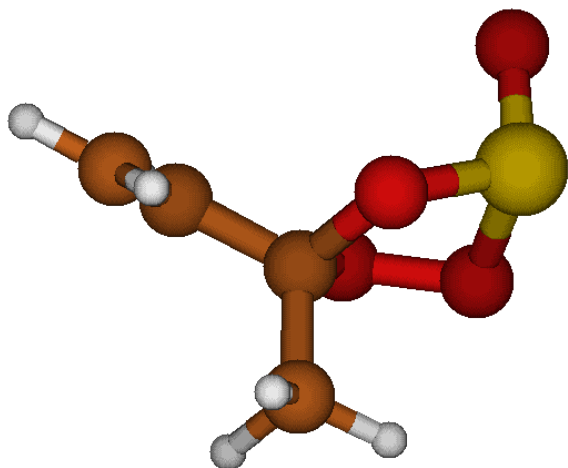

|                |           |   |           |           |           |
|----------------|-----------|---|-----------|-----------|-----------|
| 1              | 6         | 0 | -0.825407 | 0.343417  | 0.068557  |
| 2              | 8         | 0 | -0.003366 | 0.714184  | 1.164955  |
| 3              | 8         | 0 | 1.241652  | 1.129348  | 0.534996  |
| 4              | 6         | 0 | -1.370812 | 1.540569  | -0.679878 |
| 5              | 6         | 0 | -1.868915 | -0.569714 | 0.646799  |
| 6              | 1         | 0 | -0.554924 | 2.185322  | -0.994976 |
| 7              | 1         | 0 | -1.920711 | 1.202062  | -1.554498 |
| 8              | 1         | 0 | -2.045891 | 2.096189  | -0.033477 |
| 9              | 1         | 0 | -1.876912 | -0.637968 | 1.725787  |
| 10             | 6         | 0 | -2.719340 | -1.262484 | -0.098668 |
| 11             | 1         | 0 | -2.699873 | -1.216031 | -1.178169 |
| 12             | 1         | 0 | -3.448707 | -1.915528 | 0.355223  |
| 13             | 16        | 0 | 1.645742  | -0.189483 | -0.469211 |
| 14             | 8         | 0 | 0.051310  | -0.396470 | -0.834280 |
| 15             | 8         | 0 | 2.075652  | -1.321193 | 0.330158  |
| Frequencies -- | -96.9181  |   | 74.4658   |           | 182.5025  |
| Frequencies -- | 220.9202  |   | 260.6107  |           | 278.6742  |
| Frequencies -- | 316.0630  |   | 371.3625  |           | 443.3348  |
| Frequencies -- | 467.8152  |   | 507.5954  |           | 545.2081  |
| Frequencies -- | 601.5993  |   | 652.6251  |           | 682.3011  |
| Frequencies -- | 739.8253  |   | 787.5621  |           | 863.4692  |
| Frequencies -- | 898.1504  |   | 947.7932  |           | 977.4333  |
| Frequencies -- | 1012.6638 |   | 1049.2440 |           | 1118.2157 |
| Frequencies -- | 1191.4095 |   | 1260.7514 |           | 1273.5871 |
| Frequencies -- | 1329.6238 |   | 1417.3744 |           | 1463.2934 |
| Frequencies -- | 1494.7308 |   | 1499.9772 |           | 1706.0785 |
| Frequencies -- | 3075.1257 |   | 3156.7556 |           | 3164.1626 |
| Frequencies -- | 3170.2703 |   | 3200.0086 |           | 3260.6776 |

SOZ; cis = trans  
geometry b

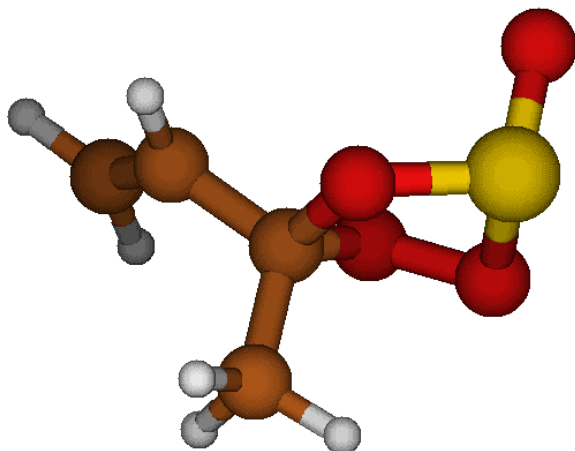

|                |           |   |           |           |           |
|----------------|-----------|---|-----------|-----------|-----------|
| 1              | 6         | 0 | -0.811085 | 0.267181  | -0.201655 |
| 2              | 8         | 0 | -0.333841 | 0.032089  | 1.116251  |
| 3              | 8         | 0 | 0.958814  | 0.715487  | 1.124231  |
| 4              | 6         | 0 | -1.298234 | 1.687901  | -0.398387 |
| 5              | 6         | 0 | -1.843209 | -0.786249 | -0.485868 |
| 6              | 1         | 0 | -0.512466 | 2.392837  | -0.140672 |
| 7              | 1         | 0 | -1.585197 | 1.832768  | -1.437135 |
| 8              | 1         | 0 | -2.166250 | 1.860672  | 0.233273  |
| 9              | 1         | 0 | -1.725135 | -1.297950 | -1.429676 |
| 10             | 6         | 0 | -2.830102 | -1.078940 | 0.351607  |
| 11             | 1         | 0 | -2.939832 | -0.576305 | 1.301801  |
| 12             | 1         | 0 | -3.549631 | -1.846545 | 0.110903  |
| 13             | 16        | 0 | 1.762687  | 0.073335  | -0.232126 |
| 14             | 8         | 0 | 0.334793  | 0.042510  | -1.065780 |
| 15             | 8         | 0 | 2.161646  | -1.299859 | 0.010468  |
| Frequencies -- | -75.8958  |   | 75.7866   |           | 192.3321  |
| Frequencies -- | 209.1616  |   | 252.5286  |           | 286.2159  |
| Frequencies -- | 325.3928  |   | 364.0805  |           | 421.0991  |
| Frequencies -- | 484.6492  |   | 488.5934  |           | 561.4365  |
| Frequencies -- | 617.8284  |   | 649.1694  |           | 685.4120  |
| Frequencies -- | 736.1086  |   | 798.1539  |           | 838.8671  |
| Frequencies -- | 894.8477  |   | 946.7115  |           | 980.8125  |
| Frequencies -- | 1019.1964 |   | 1052.7240 |           | 1144.0676 |
| Frequencies -- | 1170.7977 |   | 1263.8802 |           | 1271.3226 |
| Frequencies -- | 1324.3798 |   | 1416.3232 |           | 1462.8996 |
| Frequencies -- | 1496.5251 |   | 1498.1685 |           | 1700.3838 |
| Frequencies -- | 3074.1907 |   | 3155.8792 |           | 3163.4417 |
| Frequencies -- | 3170.5592 |   | 3212.0804 |           | 3260.9346 |

**Exo**

*syn-trans*...SO<sub>2</sub> = *syn-cis*...SO<sub>2</sub>

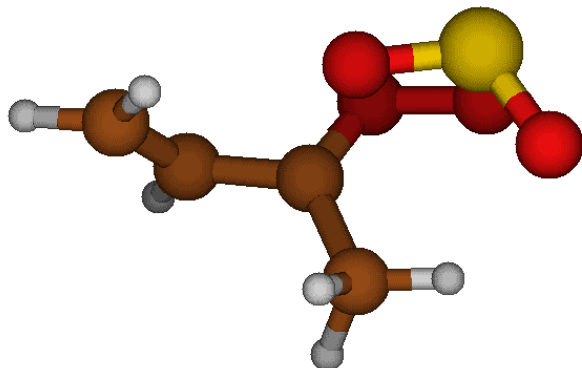

|                |           |   |           |           |           |
|----------------|-----------|---|-----------|-----------|-----------|
| 1              | 6         | 0 | -1.149908 | -0.588714 | 0.112488  |
| 2              | 8         | 0 | -0.582517 | -0.934356 | -0.975086 |
| 3              | 8         | 0 | 0.757829  | -1.316590 | -0.880511 |
| 4              | 6         | 0 | -0.634704 | -0.908268 | 1.459617  |
| 5              | 6         | 0 | -2.507615 | -0.041782 | -0.079261 |
| 6              | 1         | 0 | 0.348627  | -1.357838 | 1.416132  |
| 7              | 1         | 0 | -0.605422 | 0.000615  | 2.054298  |
| 8              | 1         | 0 | -1.359867 | -1.581435 | 1.925265  |
| 9              | 16        | 0 | 1.751506  | 0.558706  | -0.330879 |
| 10             | 8         | 0 | 0.473985  | 1.268003  | -0.066013 |
| 11             | 8         | 0 | 2.456565  | 0.083986  | 0.859583  |
| 12             | 6         | 0 | -2.750257 | 1.263475  | -0.042303 |
| 13             | 1         | 0 | -3.295077 | -0.768182 | -0.239628 |
| 14             | 1         | 0 | -1.950096 | 1.973357  | 0.103918  |
| 15             | 1         | 0 | -3.754255 | 1.637586  | -0.172959 |
| Frequencies -- | -137.2454 |   | 63.5784   |           | 82.8236   |
| Frequencies -- | 111.8508  |   | 161.8526  |           | 202.8914  |
| Frequencies -- | 208.9994  |   | 277.7327  |           | 295.2521  |
| Frequencies -- | 337.3578  |   | 379.4662  |           | 411.2342  |
| Frequencies -- | 520.6840  |   | 544.5149  |           | 606.8125  |
| Frequencies -- | 663.9245  |   | 807.1788  |           | 924.9610  |
| Frequencies -- | 990.5460  |   | 998.8587  |           | 1010.3478 |
| Frequencies -- | 1016.4557 |   | 1075.0346 |           | 1102.1108 |
| Frequencies -- | 1249.5330 |   | 1300.8653 |           | 1329.1910 |
| Frequencies -- | 1403.7664 |   | 1430.4841 |           | 1465.7504 |
| Frequencies -- | 1481.3702 |   | 1525.6310 |           | 1689.6678 |
| Frequencies -- | 3047.0326 |   | 3139.8321 |           | 3170.4656 |
| Frequencies -- | 3180.5097 |   | 3210.4498 |           | 3274.3671 |

SOZ'; cis = trans  
geometry a

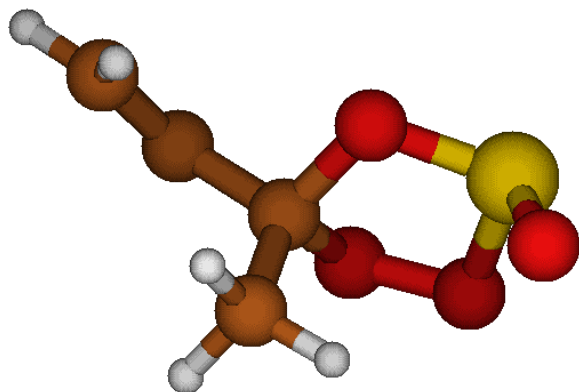

|                |           |   |           |           |           |
|----------------|-----------|---|-----------|-----------|-----------|
| 1              | 6         | 0 | 0.802265  | 0.238964  | 0.176963  |
| 2              | 8         | 0 | 0.227223  | 1.471521  | -0.219784 |
| 3              | 8         | 0 | -1.189799 | 1.279027  | -0.041198 |
| 4              | 6         | 0 | 0.716684  | -0.011677 | 1.668587  |
| 5              | 6         | 0 | 2.193444  | 0.245563  | -0.382838 |
| 6              | 1         | 0 | -0.310755 | 0.052771  | 2.012100  |
| 7              | 1         | 0 | 1.101299  | -1.004663 | 1.887015  |
| 8              | 1         | 0 | 1.326668  | 0.723316  | 2.188280  |
| 9              | 1         | 0 | 2.506097  | 1.180803  | -0.826619 |
| 10             | 6         | 0 | 2.991468  | -0.813592 | -0.359609 |
| 11             | 1         | 0 | 2.674967  | -1.756149 | 0.063717  |
| 12             | 1         | 0 | 3.982951  | -0.769724 | -0.783391 |
| 13             | 16        | 0 | -1.586169 | -0.333454 | -0.573674 |
| 14             | 8         | 0 | 0.003626  | -0.748263 | -0.550434 |
| 15             | 8         | 0 | -2.306759 | -0.883116 | 0.563799  |
| Frequencies -- | -85.2953  |   | 108.2796  |           | 164.6015  |
| Frequencies -- | 226.5849  |   | 247.3041  |           | 285.7631  |
| Frequencies -- | 323.0215  |   | 367.6012  |           | 394.3238  |
| Frequencies -- | 470.6404  |   | 506.7293  |           | 532.9293  |
| Frequencies -- | 590.6467  |   | 640.9903  |           | 679.1629  |
| Frequencies -- | 748.2718  |   | 783.7174  |           | 886.9478  |
| Frequencies -- | 918.1605  |   | 958.4712  |           | 980.5447  |
| Frequencies -- | 1013.7737 |   | 1050.6370 |           | 1116.2086 |
| Frequencies -- | 1190.7427 |   | 1248.7770 |           | 1286.3933 |
| Frequencies -- | 1329.5052 |   | 1424.2112 |           | 1464.4160 |
| Frequencies -- | 1498.3918 |   | 1503.0747 |           | 1707.3309 |
| Frequencies -- | 3079.1284 |   | 3156.7240 |           | 3170.4471 |
| Frequencies -- | 3177.3317 |   | 3198.1728 |           | 3260.8380 |



SOZ'; cis = trans  
geometry b

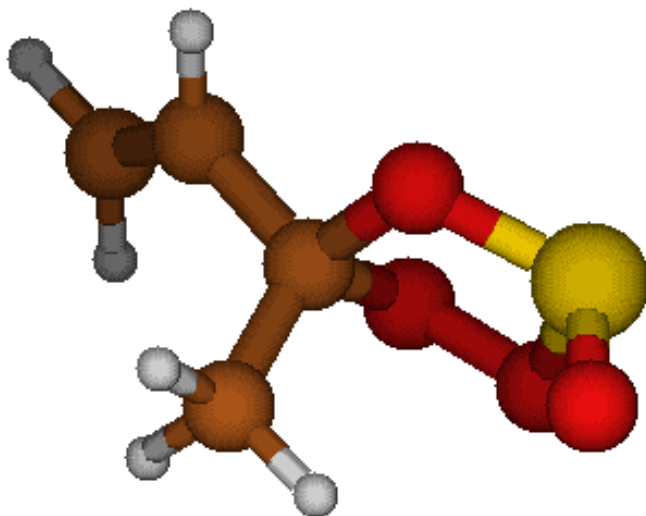

|                |           |   |           |           |           |
|----------------|-----------|---|-----------|-----------|-----------|
| 1              | 6         | 0 | -0.776471 | 0.225102  | -0.016391 |
| 2              | 8         | 0 | -0.542500 | -1.019942 | 0.625930  |
| 3              | 8         | 0 | 0.874359  | -0.997109 | 0.918638  |
| 4              | 6         | 0 | -0.663208 | 1.411817  | 0.919891  |
| 5              | 6         | 0 | -2.097256 | 0.114034  | -0.719034 |
| 6              | 1         | 0 | 0.302463  | 1.424109  | 1.415045  |
| 7              | 1         | 0 | -0.781565 | 2.329649  | 0.349149  |
| 8              | 1         | 0 | -1.457819 | 1.354279  | 1.659970  |
| 9              | 1         | 0 | -2.083319 | 0.371506  | -1.768108 |
| 10             | 6         | 0 | -3.208192 | -0.277765 | -0.108239 |
| 11             | 1         | 0 | -3.218239 | -0.547389 | 0.938131  |
| 12             | 1         | 0 | -4.139809 | -0.351690 | -0.648058 |
| 13             | 16        | 0 | 1.687166  | -0.326453 | -0.464242 |
| 14             | 8         | 0 | 0.262058  | 0.273024  | -1.033948 |
| 15             | 8         | 0 | 2.512883  | 0.719484  | 0.117428  |
| Frequencies -- | -71.8617  |   | 102.0041  |           | 170.8726  |
| Frequencies -- | 218.3242  |   | 245.3680  |           | 294.2465  |
| Frequencies -- | 308.4214  |   | 361.3665  |           | 407.1019  |
| Frequencies -- | 452.6191  |   | 503.4032  |           | 541.2898  |
| Frequencies -- | 613.9883  |   | 643.8508  |           | 682.6372  |
| Frequencies -- | 742.6893  |   | 804.5322  |           | 878.0768  |
| Frequencies -- | 898.6595  |   | 952.1154  |           | 982.0569  |
| Frequencies -- | 1019.2087 |   | 1053.6853 |           | 1147.0870 |
| Frequencies -- | 1164.9783 |   | 1250.1096 |           | 1283.0711 |
| Frequencies -- | 1325.1509 |   | 1423.2133 |           | 1463.6601 |
| Frequencies -- | 1499.3624 |   | 1501.4061 |           | 1702.2779 |
| Frequencies -- | 3078.1819 |   | 3155.5483 |           | 3170.4671 |
| Frequencies -- | 3176.7499 |   | 3209.7600 |           | 3260.9465 |

HPBF  
Conformer 1

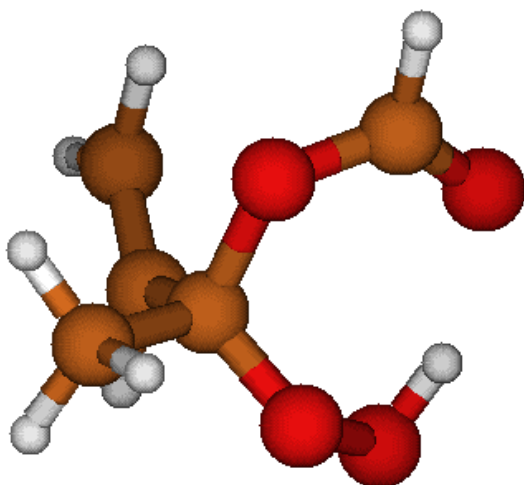

|                |           |   |           |           |           |
|----------------|-----------|---|-----------|-----------|-----------|
| 1              | 6         | 0 | 0.887132  | 1.833521  | 1.149484  |
| 2              | 6         | 0 | 1.033689  | 0.527588  | 0.972696  |
| 3              | 6         | 0 | 0.655613  | -0.227145 | -0.267388 |
| 4              | 6         | 0 | 1.835608  | -0.472676 | -1.191309 |
| 5              | 8         | 0 | -0.260085 | 0.585337  | -1.104488 |
| 6              | 6         | 0 | -1.552793 | 0.721494  | -0.833135 |
| 7              | 8         | 0 | -2.195196 | 0.212668  | 0.056200  |
| 8              | 8         | 0 | 0.132622  | -1.493107 | -0.001688 |
| 9              | 8         | 0 | -0.587135 | -1.525235 | 1.253677  |
| 10             | 1         | 0 | 0.420651  | 2.462359  | 0.406039  |
| 11             | 1         | 0 | 1.231685  | 2.308060  | 2.055470  |
| 12             | 1         | 0 | 1.500777  | -0.089177 | 1.726790  |
| 13             | 1         | 0 | 2.187882  | 0.473424  | -1.590896 |
| 14             | 1         | 0 | 2.634065  | -0.953481 | -0.633335 |
| 15             | 1         | 0 | 1.526081  | -1.122352 | -2.006823 |
| 16             | 1         | 0 | -1.997569 | 1.392848  | -1.573025 |
| 17             | 1         | 0 | -1.380709 | -1.005674 | 1.004085  |
| Frequencies -- | 76.1711   |   | 98.5487   |           | 202.2302  |
| Frequencies -- | 212.1820  |   | 245.8493  |           | 273.2042  |
| Frequencies -- | 294.7566  |   | 305.7585  |           | 332.8620  |
| Frequencies -- | 358.8855  |   | 474.2877  |           | 526.6551  |
| Frequencies -- | 574.6422  |   | 651.1098  |           | 692.8068  |
| Frequencies -- | 702.5734  |   | 816.1616  |           | 842.2435  |
| Frequencies -- | 933.2481  |   | 971.5763  |           | 989.7281  |
| Frequencies -- | 1026.8053 |   | 1051.0905 |           | 1054.6095 |
| Frequencies -- | 1135.3447 |   | 1177.4427 |           | 1242.9183 |
| Frequencies -- | 1267.6844 |   | 1327.9383 |           | 1415.4150 |
| Frequencies -- | 1422.0319 |   | 1461.0597 |           | 1496.5182 |
| Frequencies -- | 1499.6406 |   | 1508.0581 |           | 1708.5395 |
| Frequencies -- | 1757.0750 |   | 3077.5436 |           | 3079.7063 |
| Frequencies -- | 3160.6890 |   | 3172.7467 |           | 3174.6443 |
| Frequencies -- | 3210.0141 |   | 3262.9315 |           | 3497.3191 |

Conformer 2

|                |           |   |           |           |           |
|----------------|-----------|---|-----------|-----------|-----------|
| 1              | 6         | 0 | 2.800298  | -0.078238 | -0.575578 |
| 2              | 6         | 0 | 1.782497  | -0.747966 | -0.051368 |
| 3              | 6         | 0 | 0.432501  | -0.145439 | 0.222837  |
| 4              | 6         | 0 | 0.223710  | 0.169153  | 1.691010  |
| 5              | 8         | 0 | -0.492656 | -1.270099 | -0.139905 |
| 6              | 6         | 0 | -1.787283 | -1.075385 | -0.335491 |
| 7              | 8         | 0 | -2.405703 | -0.033684 | -0.298248 |
| 8              | 8         | 0 | 0.282190  | 0.928971  | -0.645465 |
| 9              | 8         | 0 | -0.617024 | 1.935990  | -0.127875 |
| 10             | 1         | 0 | 2.700249  | 0.953942  | -0.873023 |
| 11             | 1         | 0 | 3.755913  | -0.558716 | -0.721603 |
| 12             | 1         | 0 | 1.877501  | -1.784268 | 0.241133  |
| 13             | 1         | 0 | -0.805109 | 0.443408  | 1.896868  |
| 14             | 1         | 0 | 0.490531  | -0.707676 | 2.275645  |
| 15             | 1         | 0 | 0.871135  | 0.996327  | 1.967941  |
| 16             | 1         | 0 | -2.264274 | -2.035198 | -0.552882 |
| 17             | 1         | 0 | -1.470738 | 1.470002  | -0.250589 |
| Frequencies -- | 72.6077   |   | 109.6505  |           | 174.0443  |
| Frequencies -- | 228.3544  |   | 254.0508  |           | 270.5366  |
| Frequencies -- | 291.2392  |   | 294.2404  |           | 351.8090  |
| Frequencies -- | 383.7694  |   | 472.9525  |           | 504.0488  |
| Frequencies -- | 563.2571  |   | 652.0546  |           | 686.6383  |
| Frequencies -- | 723.4533  |   | 807.2726  |           | 833.4947  |
| Frequencies -- | 930.3300  |   | 980.5030  |           | 990.2689  |
| Frequencies -- | 1030.8915 |   | 1052.6003 |           | 1062.0250 |
| Frequencies -- | 1102.4706 |   | 1204.3290 |           | 1252.8101 |
| Frequencies -- | 1280.8337 |   | 1329.9264 |           | 1419.0313 |
| Frequencies -- | 1421.4803 |   | 1456.2740 |           | 1496.2891 |
| Frequencies -- | 1500.3208 |   | 1502.3878 |           | 1707.3000 |
| Frequencies -- | 1744.7778 |   | 3079.4897 |           | 3084.3109 |
| Frequencies -- | 3163.5218 |   | 3176.6857 |           | 3180.1701 |
| Frequencies -- | 3202.7073 |   | 3271.2215 |           | 3511.0775 |

Conformer 3

|                |           |   |           |           |           |
|----------------|-----------|---|-----------|-----------|-----------|
| 1              | 6         | 0 | -2.700863 | 0.677522  | -0.396425 |
| 2              | 6         | 0 | -1.907555 | -0.354897 | -0.145113 |
| 3              | 6         | 0 | -0.436016 | -0.293236 | 0.160140  |
| 4              | 6         | 0 | -0.115599 | -0.828123 | 1.542376  |
| 5              | 8         | 0 | -0.083298 | 1.144070  | 0.126040  |
| 6              | 6         | 0 | 1.168304  | 1.567049  | 0.019593  |
| 7              | 8         | 0 | 2.177512  | 0.909985  | -0.102894 |
| 8              | 8         | 0 | 0.158020  | -0.992693 | -0.896774 |
| 9              | 8         | 0 | 1.411122  | -1.612816 | -0.519061 |
| 10             | 1         | 0 | -2.330660 | 1.690002  | -0.403682 |
| 11             | 1         | 0 | -3.749164 | 0.522127  | -0.602266 |
| 12             | 1         | 0 | -2.291444 | -1.365908 | -0.148592 |
| 13             | 1         | 0 | -0.705340 | -0.277363 | 2.270200  |
| 14             | 1         | 0 | -0.377204 | -1.882051 | 1.586777  |
| 15             | 1         | 0 | 0.939547  | -0.726421 | 1.769854  |
| 16             | 1         | 0 | 1.176309  | 2.659874  | 0.056525  |
| 17             | 1         | 0 | 1.981476  | -0.818516 | -0.470734 |
| Frequencies -- | 70.9725   |   | 83.0563   |           | 183.1175  |
| Frequencies -- | 225.3040  |   | 248.2182  |           | 255.7482  |
| Frequencies -- | 281.4223  |   | 308.5218  |           | 352.2594  |
| Frequencies -- | 411.3527  |   | 443.2096  |           | 499.0019  |
| Frequencies -- | 581.2000  |   | 645.2795  |           | 689.4894  |
| Frequencies -- | 702.6669  |   | 820.9861  |           | 848.7920  |
| Frequencies -- | 924.5984  |   | 965.8192  |           | 982.8748  |
| Frequencies -- | 1029.9415 |   | 1050.2296 |           | 1052.6445 |
| Frequencies -- | 1135.8451 |   | 1187.7340 |           | 1245.4425 |
| Frequencies -- | 1273.9436 |   | 1330.7779 |           | 1419.6062 |
| Frequencies -- | 1422.4236 |   | 1459.7448 |           | 1490.5004 |
| Frequencies -- | 1498.5693 |   | 1501.6175 |           | 1709.8954 |
| Frequencies -- | 1752.1261 |   | 3081.3073 |           | 3085.3122 |
| Frequencies -- | 3163.9066 |   | 3179.2747 |           | 3182.0759 |
| Frequencies -- | 3199.4308 |   | 3274.0408 |           | 3533.6429 |

Conformer 4

|                |           |   |           |           |           |
|----------------|-----------|---|-----------|-----------|-----------|
| 1              | 6         | 0 | 2.256691  | 0.310569  | -1.343272 |
| 2              | 6         | 0 | 0.990230  | 0.369548  | -0.951865 |
| 3              | 6         | 0 | 0.478134  | -0.196689 | 0.339340  |
| 4              | 6         | 0 | 1.474675  | -0.945423 | 1.195306  |
| 5              | 8         | 0 | -0.507320 | -1.274408 | -0.025416 |
| 6              | 6         | 0 | -1.723094 | -1.009747 | -0.476735 |
| 7              | 8         | 0 | -2.252354 | 0.069999  | -0.628895 |
| 8              | 8         | 0 | -0.101405 | 0.735899  | 1.200238  |
| 9              | 8         | 0 | -0.655706 | 1.876741  | 0.504841  |
| 10             | 1         | 0 | 3.031646  | -0.140918 | -0.742866 |
| 11             | 1         | 0 | 2.555588  | 0.729250  | -2.292392 |
| 12             | 1         | 0 | 0.248588  | 0.838287  | -1.578912 |
| 13             | 1         | 0 | 1.855298  | -1.810345 | 0.661139  |
| 14             | 1         | 0 | 2.291198  | -0.284501 | 1.468692  |
| 15             | 1         | 0 | 0.972995  | -1.278056 | 2.099917  |
| 16             | 1         | 0 | -2.229915 | -1.950814 | -0.708395 |
| 17             | 1         | 0 | -1.450921 | 1.461696  | 0.110020  |
| Frequencies -- | 66.3568   |   | 77.8885   |           | 190.0123  |
| Frequencies -- | 230.3490  |   | 260.2765  |           | 270.6017  |
| Frequencies -- | 295.5257  |   | 316.5064  |           | 332.6341  |
| Frequencies -- | 385.9255  |   | 431.7643  |           | 497.2633  |
| Frequencies -- | 555.9009  |   | 640.1973  |           | 673.5732  |
| Frequencies -- | 747.1058  |   | 796.5578  |           | 827.1998  |
| Frequencies -- | 929.0861  |   | 981.1652  |           | 987.1140  |
| Frequencies -- | 1029.8110 |   | 1039.1963 |           | 1053.2775 |
| Frequencies -- | 1098.1228 |   | 1196.3029 |           | 1249.1956 |
| Frequencies -- | 1319.5007 |   | 1347.1306 |           | 1417.1866 |
| Frequencies -- | 1423.5562 |   | 1465.3969 |           | 1500.1482 |
| Frequencies -- | 1502.9957 |   | 1509.3740 |           | 1708.8388 |
| Frequencies -- | 1743.1153 |   | 3079.0016 |           | 3086.9559 |
| Frequencies -- | 3167.8822 |   | 3176.3493 |           | 3178.8435 |
| Frequencies -- | 3227.3268 |   | 3263.0480 |           | 3515.1882 |

Conformer 5

|                |           |   |           |           |           |
|----------------|-----------|---|-----------|-----------|-----------|
| 1              | 6         | 0 | 1.862518  | -1.184768 | 1.034523  |
| 2              | 6         | 0 | 1.028076  | -0.154746 | 1.079421  |
| 3              | 6         | 0 | 0.442672  | 0.538891  | -0.116905 |
| 4              | 6         | 0 | 1.240147  | 1.769321  | -0.515581 |
| 5              | 8         | 0 | -0.864598 | 1.141518  | 0.312323  |
| 6              | 6         | 0 | -1.957120 | 0.419068  | 0.502308  |
| 7              | 8         | 0 | -2.122102 | -0.762068 | 0.290876  |
| 8              | 8         | 0 | 0.316997  | -0.188064 | -1.293753 |
| 9              | 8         | 0 | -0.021816 | -1.583978 | -1.105457 |
| 10             | 1         | 0 | 2.116602  | -1.670192 | 0.106395  |
| 11             | 1         | 0 | 2.296389  | -1.572963 | 1.943961  |
| 12             | 1         | 0 | 0.779032  | 0.314646  | 2.021722  |
| 13             | 1         | 0 | 0.761089  | 2.250422  | -1.365013 |
| 14             | 1         | 0 | 1.280144  | 2.466068  | 0.316859  |
| 15             | 1         | 0 | 2.246722  | 1.464274  | -0.784319 |
| 16             | 1         | 0 | -2.749873 | 1.063724  | 0.892065  |
| 17             | 1         | 0 | -0.895706 | -1.501825 | -0.666180 |
| Frequencies -- | 54.8229   |   | 92.8148   |           | 192.7587  |
| Frequencies -- | 219.1158  |   | 241.3391  |           | 261.0966  |
| Frequencies -- | 293.4826  |   | 303.5717  |           | 333.2831  |
| Frequencies -- | 345.7920  |   | 456.9745  |           | 495.2362  |
| Frequencies -- | 557.3205  |   | 649.4915  |           | 680.8286  |
| Frequencies -- | 720.5705  |   | 794.9812  |           | 828.8467  |
| Frequencies -- | 927.9457  |   | 982.7147  |           | 992.9715  |
| Frequencies -- | 1026.7125 |   | 1054.9495 |           | 1063.3596 |
| Frequencies -- | 1099.9610 |   | 1183.3088 |           | 1244.2319 |
| Frequencies -- | 1292.9000 |   | 1334.9112 |           | 1413.6882 |
| Frequencies -- | 1418.7588 |   | 1461.7528 |           | 1496.2354 |
| Frequencies -- | 1498.4557 |   | 1528.3866 |           | 1706.7823 |
| Frequencies -- | 1749.0698 |   | 3078.5776 |           | 3080.3184 |
| Frequencies -- | 3162.1624 |   | 3174.5581 |           | 3176.6790 |
| Frequencies -- | 3192.2964 |   | 3276.2387 |           | 3477.4975 |

Conformer 6

|                |           |   |           |           |           |
|----------------|-----------|---|-----------|-----------|-----------|
| 1              | 6         | 0 | -1.674338 | 1.722750  | -0.541696 |
| 2              | 6         | 0 | -0.454659 | 1.238912  | -0.347264 |
| 3              | 6         | 0 | -0.171135 | -0.034434 | 0.397970  |
| 4              | 6         | 0 | 0.358532  | 0.204850  | 1.800976  |
| 5              | 8         | 0 | 0.757458  | -0.881697 | -0.368160 |
| 6              | 6         | 0 | 2.001743  | -0.471506 | -0.646335 |
| 7              | 8         | 0 | 2.512511  | 0.572308  | -0.337010 |
| 8              | 8         | 0 | -1.287380 | -0.858438 | 0.595436  |
| 9              | 8         | 0 | -1.864228 | -1.227222 | -0.681641 |
| 10             | 1         | 0 | -2.555267 | 1.189274  | -0.220298 |
| 11             | 1         | 0 | -1.814029 | 2.671058  | -1.038620 |
| 12             | 1         | 0 | 0.421650  | 1.782799  | -0.666625 |
| 13             | 1         | 0 | 0.638567  | -0.743559 | 2.253615  |
| 14             | 1         | 0 | 1.220340  | 0.861903  | 1.760179  |
| 15             | 1         | 0 | -0.424830 | 0.671901  | 2.391634  |
| 16             | 1         | 0 | 2.504292  | -1.260193 | -1.216057 |
| 17             | 1         | 0 | -1.298470 | -1.976214 | -0.914732 |
| Frequencies -- | 94.0340   |   | 103.6592  |           | 157.2415  |
| Frequencies -- | 190.1500  |   | 220.9352  |           | 240.4219  |
| Frequencies -- | 244.4562  |   | 249.4702  |           | 300.9962  |
| Frequencies -- | 333.4790  |   | 383.8830  |           | 444.1606  |
| Frequencies -- | 503.3586  |   | 582.5964  |           | 697.1762  |
| Frequencies -- | 732.8237  |   | 807.6844  |           | 863.5570  |
| Frequencies -- | 918.6703  |   | 975.7838  |           | 982.8918  |
| Frequencies -- | 1041.8929 |   | 1045.2582 |           | 1064.5126 |
| Frequencies -- | 1119.1812 |   | 1183.6051 |           | 1212.0479 |
| Frequencies -- | 1289.0441 |   | 1332.9549 |           | 1399.6695 |
| Frequencies -- | 1409.8760 |   | 1416.0447 |           | 1462.5033 |
| Frequencies -- | 1498.3652 |   | 1505.3240 |           | 1707.8531 |
| Frequencies -- | 1778.2308 |   | 3061.1112 |           | 3079.9520 |
| Frequencies -- | 3160.4578 |   | 3175.8834 |           | 3184.6688 |
| Frequencies -- | 3218.8248 |   | 3268.4147 |           | 3759.2248 |

Conformer 7

|                |           |   |           |           |           |
|----------------|-----------|---|-----------|-----------|-----------|
| 1              | 6         | 0 | -1.154950 | 2.330792  | -0.297869 |
| 2              | 6         | 0 | -0.166662 | 1.519720  | 0.059372  |
| 3              | 6         | 0 | -0.284853 | 0.025600  | 0.181687  |
| 4              | 6         | 0 | -0.069336 | -0.470952 | 1.597731  |
| 5              | 8         | 0 | 0.660637  | -0.634168 | -0.742234 |
| 6              | 6         | 0 | 1.983137  | -0.476287 | -0.610022 |
| 7              | 8         | 0 | 2.562074  | 0.195441  | 0.202901  |
| 8              | 8         | 0 | -1.538893 | -0.317469 | -0.339124 |
| 9              | 8         | 0 | -1.755794 | -1.737260 | -0.177692 |
| 10             | 1         | 0 | -2.137316 | 1.962781  | -0.548197 |
| 11             | 1         | 0 | -0.992013 | 3.397291  | -0.341954 |
| 12             | 1         | 0 | 0.809941  | 1.902402  | 0.314622  |
| 13             | 1         | 0 | -0.066720 | -1.555864 | 1.619678  |
| 14             | 1         | 0 | 0.871984  | -0.093347 | 1.982129  |
| 15             | 1         | 0 | -0.886613 | -0.103740 | 2.213683  |
| 16             | 1         | 0 | 2.479600  | -1.069218 | -1.385580 |
| 17             | 1         | 0 | -1.347074 | -2.065893 | -0.990579 |
| Frequencies -- | 43.5490   |   | 98.7842   |           | 129.3191  |
| Frequencies -- | 204.3070  |   | 220.6656  |           | 228.5749  |
| Frequencies -- | 257.1323  |   | 286.9489  |           | 310.2734  |
| Frequencies -- | 329.8679  |   | 409.7847  |           | 462.0348  |
| Frequencies -- | 494.7611  |   | 565.4119  |           | 673.7914  |
| Frequencies -- | 728.2247  |   | 811.0002  |           | 882.7275  |
| Frequencies -- | 926.8690  |   | 968.2530  |           | 986.9309  |
| Frequencies -- | 1044.4577 |   | 1049.5988 |           | 1062.7698 |
| Frequencies -- | 1112.4270 |   | 1195.7764 |           | 1234.0116 |
| Frequencies -- | 1276.9768 |   | 1336.0482 |           | 1399.0534 |
| Frequencies -- | 1413.0014 |   | 1416.2748 |           | 1463.8452 |
| Frequencies -- | 1500.1601 |   | 1508.0085 |           | 1704.9298 |
| Frequencies -- | 1776.6319 |   | 3058.8456 |           | 3087.0457 |
| Frequencies -- | 3167.7082 |   | 3177.0361 |           | 3185.7857 |
| Frequencies -- | 3221.5582 |   | 3270.1645 |           | 3756.4166 |



Conformer 8

|                |           |   |           |           |           |
|----------------|-----------|---|-----------|-----------|-----------|
| 1              | 6         | 0 | 1.374023  | 2.111856  | -0.111803 |
| 2              | 6         | 0 | 0.491501  | 1.311409  | -0.693233 |
| 3              | 6         | 0 | -0.326886 | 0.267698  | 0.010845  |
| 4              | 6         | 0 | -0.264716 | 0.243469  | 1.519962  |
| 5              | 8         | 0 | -0.004544 | -1.053816 | -0.554967 |
| 6              | 6         | 0 | 1.197586  | -1.613519 | -0.342556 |
| 7              | 8         | 0 | 2.104060  | -1.171405 | 0.309191  |
| 8              | 8         | 0 | -1.626102 | 0.517698  | -0.476233 |
| 9              | 8         | 0 | -2.552744 | -0.439415 | 0.093444  |
| 10             | 1         | 0 | 1.583744  | 2.066793  | 0.945605  |
| 11             | 1         | 0 | 1.926988  | 2.833964  | -0.693269 |
| 12             | 1         | 0 | 0.306226  | 1.365362  | -1.757726 |
| 13             | 1         | 0 | -0.653922 | 1.185063  | 1.898671  |
| 14             | 1         | 0 | -0.884449 | -0.565279 | 1.891787  |
| 15             | 1         | 0 | 0.755498  | 0.101316  | 1.856682  |
| 16             | 1         | 0 | 1.226826  | -2.569634 | -0.876707 |
| 17             | 1         | 0 | -2.455328 | -1.167558 | -0.535813 |
| Frequencies -- | 52.1622   |   | 89.8422   |           | 135.6378  |
| Frequencies -- | 206.3076  |   | 224.1317  |           | 228.7328  |
| Frequencies -- | 249.9107  |   | 294.4314  |           | 321.0038  |
| Frequencies -- | 345.9323  |   | 416.8605  |           | 428.2077  |
| Frequencies -- | 500.8694  |   | 576.9841  |           | 649.4785  |
| Frequencies -- | 723.2063  |   | 814.0751  |           | 893.0125  |
| Frequencies -- | 915.3274  |   | 948.4706  |           | 985.5456  |
| Frequencies -- | 1028.1844 |   | 1034.5877 |           | 1043.4320 |
| Frequencies -- | 1123.9488 |   | 1192.9246 |           | 1202.0943 |
| Frequencies -- | 1309.1027 |   | 1335.3283 |           | 1390.6948 |
| Frequencies -- | 1415.4315 |   | 1418.8487 |           | 1462.9530 |
| Frequencies -- | 1504.6030 |   | 1516.2279 |           | 1713.2945 |
| Frequencies -- | 1784.8432 |   | 3053.8729 |           | 3092.9023 |
| Frequencies -- | 3172.8335 |   | 3177.1970 |           | 3193.3726 |
| Frequencies -- | 3194.1770 |   | 3266.4829 |           | 3757.5812 |

Conformer 9

|                |           |   |           |           |           |
|----------------|-----------|---|-----------|-----------|-----------|
| 1              | 6         | 0 | 0.627628  | 2.218261  | -0.568681 |
| 2              | 6         | 0 | -0.196589 | 1.185170  | -0.683224 |
| 3              | 6         | 0 | -0.352857 | 0.093177  | 0.333459  |
| 4              | 6         | 0 | 0.191471  | 0.361097  | 1.719807  |
| 5              | 8         | 0 | 0.183918  | -1.161909 | -0.220115 |
| 6              | 6         | 0 | 1.501334  | -1.305401 | -0.436957 |
| 7              | 8         | 0 | 2.373677  | -0.524157 | -0.170905 |
| 8              | 8         | 0 | -1.709244 | -0.212846 | 0.568126  |
| 9              | 8         | 0 | -2.374427 | -0.506072 | -0.683757 |
| 10             | 1         | 0 | 1.284994  | 2.345963  | 0.277405  |
| 11             | 1         | 0 | 0.673746  | 2.970015  | -1.342422 |
| 12             | 1         | 0 | -0.830933 | 1.074822  | -1.549560 |
| 13             | 1         | 0 | -0.336420 | 1.206486  | 2.151773  |
| 14             | 1         | 0 | 0.027127  | -0.517213 | 2.338472  |
| 15             | 1         | 0 | 1.252867  | 0.572415  | 1.673367  |
| 16             | 1         | 0 | 1.665968  | -2.283242 | -0.902688 |
| 17             | 1         | 0 | -2.154657 | -1.443186 | -0.779567 |
| Frequencies -- | 50.6800   |   | 98.0937   |           | 141.9017  |
| Frequencies -- | 203.3189  |   | 216.9084  |           | 237.9371  |
| Frequencies -- | 259.0828  |   | 292.6021  |           | 311.8059  |
| Frequencies -- | 369.4189  |   | 374.2639  |           | 428.9182  |
| Frequencies -- | 498.3528  |   | 594.6826  |           | 660.0609  |
| Frequencies -- | 731.4627  |   | 821.3215  |           | 853.9187  |
| Frequencies -- | 920.3430  |   | 965.4445  |           | 980.6762  |
| Frequencies -- | 1030.1599 |   | 1038.8639 |           | 1042.9657 |
| Frequencies -- | 1123.0195 |   | 1192.0355 |           | 1207.5967 |
| Frequencies -- | 1306.8671 |   | 1335.7605 |           | 1395.9644 |
| Frequencies -- | 1414.2006 |   | 1417.6825 |           | 1465.4207 |
| Frequencies -- | 1500.4944 |   | 1515.6410 |           | 1710.1232 |
| Frequencies -- | 1783.9694 |   | 3054.5957 |           | 3088.6734 |
| Frequencies -- | 3164.8523 |   | 3175.8920 |           | 3195.6310 |
| Frequencies -- | 3220.5255 |   | 3263.3052 |           | 3757.8764 |

**5.4 MVK-oxide + formic acid**  
**Planar minimum**

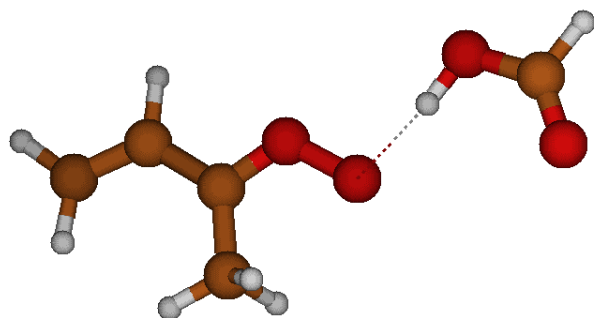

|                |           |   |           |           |           |
|----------------|-----------|---|-----------|-----------|-----------|
| 1              | 6         | 0 | 1.741217  | 0.130226  | 0.000189  |
| 2              | 8         | 0 | 0.555319  | -0.358983 | 0.000568  |
| 3              | 8         | 0 | -0.473966 | 0.542452  | 0.000064  |
| 4              | 8         | 0 | -3.904313 | 0.798072  | 0.000785  |
| 5              | 6         | 0 | -3.759207 | -0.399502 | -0.000162 |
| 6              | 8         | 0 | -2.604470 | -1.054101 | -0.000957 |
| 7              | 1         | 0 | -4.594850 | -1.110732 | -0.000285 |
| 8              | 1         | 0 | -1.846557 | -0.401643 | -0.000741 |
| 9              | 6         | 0 | 1.899630  | 1.592252  | -0.000496 |
| 10             | 6         | 0 | 2.776238  | -0.871954 | 0.000469  |
| 11             | 6         | 0 | 4.087061  | -0.601848 | -0.000134 |
| 12             | 1         | 0 | 2.939955  | 1.892743  | 0.000320  |
| 13             | 1         | 0 | 1.372547  | 1.997505  | 0.864787  |
| 14             | 1         | 0 | 1.374324  | 1.996632  | -0.867284 |
| 15             | 1         | 0 | 2.423735  | -1.894328 | 0.001128  |
| 16             | 1         | 0 | 4.469782  | 0.407095  | -0.000845 |
| 17             | 1         | 0 | 4.810873  | -1.401840 | 0.000045  |
| Frequencies -- | -11.2128  |   | 28.0164   |           | 28.5450   |
| Frequencies -- | 93.0419   |   | 114.4863  |           | 187.3679  |
| Frequencies -- | 187.6019  |   | 202.7433  |           | 283.9468  |
| Frequencies -- | 288.2781  |   | 374.3504  |           | 466.6073  |
| Frequencies -- | 499.7103  |   | 613.3722  |           | 688.0206  |
| Frequencies -- | 700.7362  |   | 816.1089  |           | 960.2787  |
| Frequencies -- | 971.2524  |   | 981.8794  |           | 1023.7979 |
| Frequencies -- | 1028.5016 |   | 1046.9966 |           | 1070.0874 |
| Frequencies -- | 1078.7956 |   | 1223.0542 |           | 1307.2149 |
| Frequencies -- | 1340.6752 |   | 1402.9329 |           | 1407.4447 |
| Frequencies -- | 1452.4933 |   | 1462.4560 |           | 1478.6718 |
| Frequencies -- | 1489.8396 |   | 1505.6518 |           | 1670.7873 |
| Frequencies -- | 1790.6366 |   | 3027.2501 |           | 3058.1226 |
| Frequencies -- | 3105.0973 |   | 3130.1696 |           | 3182.2002 |
| Frequencies -- | 3195.2472 |   | 3202.5521 |           | 3274.2473 |

*van der Waals minimum*

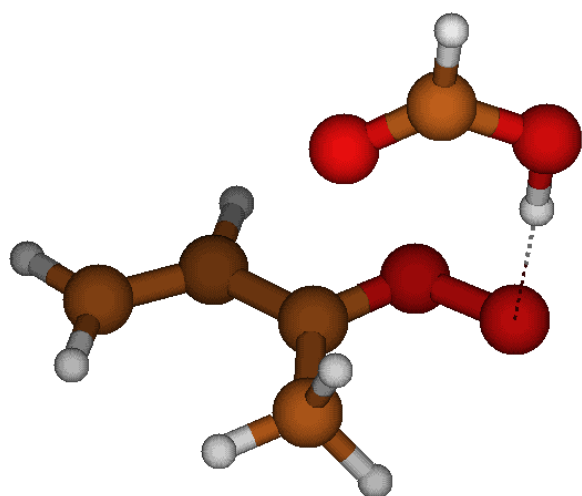

|                |           |   |           |           |           |
|----------------|-----------|---|-----------|-----------|-----------|
| 1              | 6         | 0 | 0.000000  | 0.000000  | 0.000000  |
| 2              | 8         | 0 | 0.000000  | 0.000000  | 1.275955  |
| 3              | 8         | 0 | 1.245775  | 0.000000  | 1.892005  |
| 4              | 8         | 0 | 0.606398  | -2.800437 | 0.381749  |
| 5              | 6         | 0 | 1.017466  | -3.231013 | 1.441733  |
| 6              | 8         | 0 | 1.418780  | -2.525602 | 2.475900  |
| 7              | 1         | 0 | 1.096188  | -4.304566 | 1.647652  |
| 8              | 1         | 0 | 1.354816  | -1.531258 | 2.273211  |
| 9              | 6         | 0 | 1.271230  | 0.075133  | -0.735745 |
| 10             | 6         | 0 | -1.329184 | -0.043379 | -0.564140 |
| 11             | 6         | 0 | -1.585380 | -0.054876 | -1.875686 |
| 12             | 1         | 0 | 1.115967  | 0.238392  | -1.795234 |
| 13             | 1         | 0 | 1.804535  | -0.859772 | -0.570167 |
| 14             | 1         | 0 | 1.877193  | 0.865388  | -0.294599 |
| 15             | 1         | 0 | -2.132100 | -0.086121 | 0.158207  |
| 16             | 1         | 0 | -0.802662 | -0.028630 | -2.617617 |
| 17             | 1         | 0 | -2.601700 | -0.103459 | -2.234886 |
| Frequencies -- | 46.8365   |   | 56.9407   |           | 93.3520   |
| Frequencies -- | 126.3653  |   | 148.3550  |           | 156.9454  |
| Frequencies -- | 221.9254  |   | 247.4525  |           | 269.3290  |
| Frequencies -- | 338.2014  |   | 358.9841  |           | 455.7681  |
| Frequencies -- | 493.3374  |   | 597.9164  |           | 688.1404  |
| Frequencies -- | 708.0896  |   | 808.8531  |           | 926.4019  |
| Frequencies -- | 991.7365  |   | 1019.5153 |           | 1028.1072 |
| Frequencies -- | 1041.7520 |   | 1047.0099 |           | 1071.0999 |
| Frequencies -- | 1116.5869 |   | 1260.2678 |           | 1313.3572 |
| Frequencies -- | 1342.3675 |   | 1392.1696 |           | 1408.1414 |
| Frequencies -- | 1457.3675 |   | 1471.1291 |           | 1492.7186 |
| Frequencies -- | 1502.5265 |   | 1519.0126 |           | 1678.8845 |
| Frequencies -- | 1747.2199 |   | 2799.5379 |           | 3051.0151 |
| Frequencies -- | 3073.7270 |   | 3135.1225 |           | 3183.0650 |
| Frequencies -- | 3193.5201 |   | 3207.7761 |           | 3275.1933 |

van der Waals minimum = HPBF

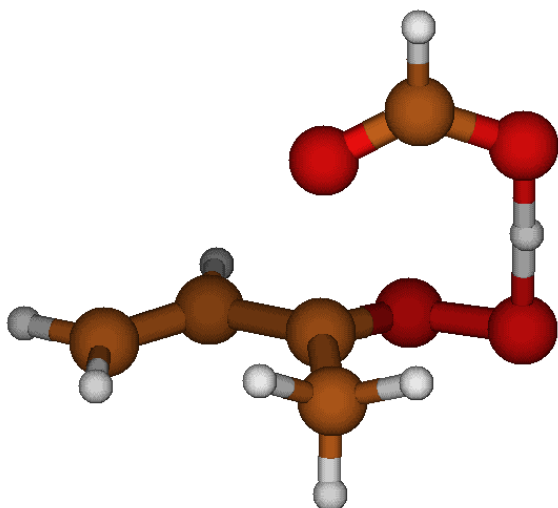

|                |           |   |           |           |           |
|----------------|-----------|---|-----------|-----------|-----------|
| 1              | 6         | 0 | 0.735502  | 0.454862  | 0.005429  |
| 2              | 8         | 0 | -0.012061 | 1.158611  | -0.764566 |
| 3              | 8         | 0 | -1.165269 | 1.718647  | -0.142895 |
| 4              | 8         | 0 | -0.488945 | -1.447803 | 0.047960  |
| 5              | 6         | 0 | -1.725710 | -1.379711 | -0.017457 |
| 6              | 8         | 0 | -2.456497 | -0.330435 | -0.094877 |
| 7              | 1         | 0 | -2.299636 | -2.314001 | -0.008477 |
| 8              | 1         | 0 | -1.862852 | 0.675446  | -0.120004 |
| 9              | 6         | 0 | 0.665065  | 0.556642  | 1.481842  |
| 10             | 6         | 0 | 1.860444  | -0.120030 | -0.717072 |
| 11             | 6         | 0 | 2.908772  | -0.687222 | -0.120910 |
| 12             | 1         | 0 | 1.082850  | -0.330317 | 1.941562  |
| 13             | 1         | 0 | 1.249719  | 1.432001  | 1.776493  |
| 14             | 1         | 0 | -0.355806 | 0.708391  | 1.801768  |
| 15             | 1         | 0 | 1.796939  | -0.048340 | -1.793121 |
| 16             | 1         | 0 | 2.983701  | -0.776058 | 0.951796  |
| 17             | 1         | 0 | 3.722827  | -1.086513 | -0.705978 |
| Frequencies -- | -598.0338 |   | 58.5295   |           | 83.8810   |
| Frequencies -- | 142.1704  |   | 169.6873  |           | 192.1403  |
| Frequencies -- | 250.3268  |   | 271.1921  |           | 305.4575  |
| Frequencies -- | 345.1720  |   | 376.8882  |           | 461.5846  |
| Frequencies -- | 484.5414  |   | 575.6331  |           | 662.7502  |
| Frequencies -- | 706.2328  |   | 774.5847  |           | 819.0039  |
| Frequencies -- | 939.2021  |   | 995.0411  |           | 1000.5989 |
| Frequencies -- | 1028.5869 |   | 1060.3462 |           | 1066.7508 |
| Frequencies -- | 1078.1853 |   | 1271.7963 |           | 1318.4128 |
| Frequencies -- | 1346.0554 |   | 1354.1718 |           | 1403.3264 |
| Frequencies -- | 1417.4923 |   | 1456.9270 |           | 1475.3778 |
| Frequencies -- | 1496.8015 |   | 1526.9577 |           | 1669.0611 |
| Frequencies -- | 1691.6501 |   | 1744.9004 |           | 3039.1798 |
| Frequencies -- | 3057.8435 |   | 3169.0449 |           | 3183.6576 |
| Frequencies -- | 3213.6016 |   | 3225.2961 |           | 3273.7312 |

HPBF

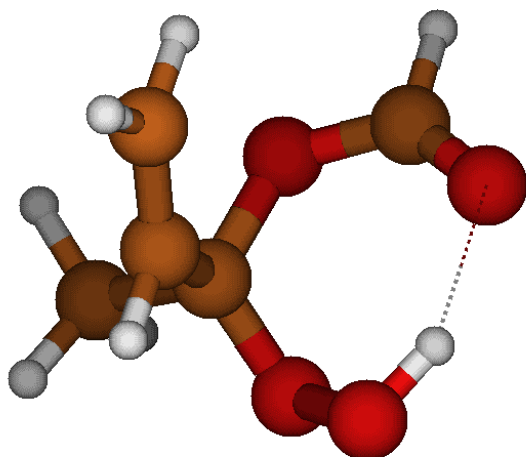

|                |           |   |           |           |           |
|----------------|-----------|---|-----------|-----------|-----------|
| 1              | 6         | 0 | -0.883500 | 1.834737  | 1.149530  |
| 2              | 6         | 0 | -1.034160 | 0.529419  | 0.971859  |
| 3              | 1         | 0 | -1.227925 | 2.310005  | 2.055163  |
| 4              | 1         | 0 | -0.413804 | 2.462367  | 0.407125  |
| 5              | 6         | 0 | -0.655954 | -0.226175 | -0.267616 |
| 6              | 1         | 0 | -1.504382 | -0.086180 | 1.724944  |
| 7              | 6         | 0 | -1.836046 | -0.471726 | -1.191482 |
| 8              | 8         | 0 | 0.260416  | 0.584631  | -1.104752 |
| 9              | 8         | 0 | -0.134272 | -1.492675 | -0.000581 |
| 10             | 1         | 0 | -2.188107 | 0.474285  | -1.591477 |
| 11             | 1         | 0 | -1.526585 | -1.121755 | -2.006710 |
| 12             | 1         | 0 | -2.634634 | -0.952142 | -0.633379 |
| 13             | 6         | 0 | 1.553524  | 0.719314  | -0.833830 |
| 14             | 8         | 0 | 0.585099  | -1.524915 | 1.255073  |
| 15             | 8         | 0 | 2.195498  | 0.210024  | 0.055430  |
| 16             | 1         | 0 | 1.998607  | 1.390186  | -1.573964 |
| 17             | 1         | 0 | 1.379722  | -1.006701 | 1.006175  |
| Frequencies -- | 76.0580   |   | 98.5864   |           | 202.2503  |
| Frequencies -- | 212.1732  |   | 245.6072  |           | 272.8544  |
| Frequencies -- | 294.5828  |   | 305.7747  |           | 332.8314  |
| Frequencies -- | 358.7746  |   | 474.4106  |           | 526.5001  |
| Frequencies -- | 574.6054  |   | 651.3611  |           | 692.4755  |
| Frequencies -- | 702.5520  |   | 816.2610  |           | 842.2525  |
| Frequencies -- | 933.1789  |   | 971.4580  |           | 989.3940  |
| Frequencies -- | 1026.7452 |   | 1051.0041 |           | 1054.5359 |
| Frequencies -- | 1135.5926 |   | 1177.0500 |           | 1242.5607 |
| Frequencies -- | 1267.6093 |   | 1327.8929 |           | 1415.3733 |
| Frequencies -- | 1422.0245 |   | 1461.0687 |           | 1496.5053 |
| Frequencies -- | 1499.6251 |   | 1507.1182 |           | 1708.6714 |
| Frequencies -- | 1757.4064 |   | 3077.6396 |           | 3079.7797 |
| Frequencies -- | 3160.8343 |   | 3172.7541 |           | 3174.8347 |
| Frequencies -- | 3210.0886 |   | 3263.1153 |           | 3498.3543 |

**Alkoxy**

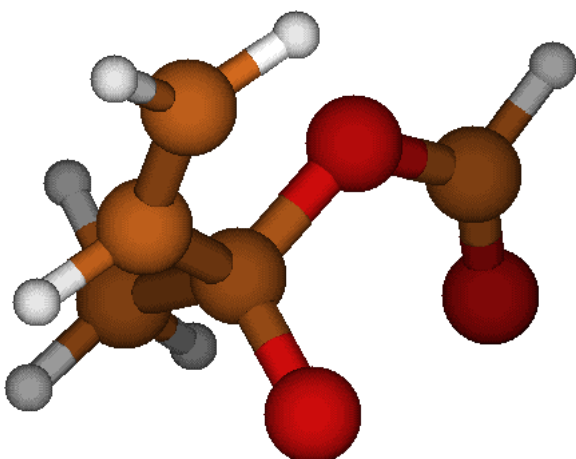

|                |           |   |           |           |           |
|----------------|-----------|---|-----------|-----------|-----------|
| 1              | 6         | 0 | 2.372674  | -1.020834 | -0.081462 |
| 2              | 6         | 0 | 1.802909  | 0.171921  | 0.034423  |
| 3              | 1         | 0 | 3.448819  | -1.110346 | -0.098440 |
| 4              | 1         | 0 | 1.785744  | -1.919485 | -0.181417 |
| 5              | 6         | 0 | 0.297368  | 0.406274  | 0.068797  |
| 6              | 1         | 0 | 2.382535  | 1.074785  | 0.156943  |
| 7              | 6         | 0 | -0.114558 | 1.570558  | -0.832022 |
| 8              | 8         | 0 | 0.074864  | 0.636804  | 1.370559  |
| 9              | 8         | 0 | -0.331173 | -0.831697 | -0.394272 |
| 10             | 1         | 0 | 0.095177  | 1.310963  | -1.866845 |
| 11             | 1         | 0 | 0.457472  | 2.451934  | -0.554932 |
| 12             | 1         | 0 | -1.172513 | 1.773592  | -0.706715 |
| 13             | 6         | 0 | -1.655823 | -0.957260 | -0.204460 |
| 14             | 8         | 0 | -2.399740 | -0.137245 | 0.260446  |
| 15             | 1         | 0 | -1.964267 | -1.948301 | -0.554118 |
| Frequencies -- | 62.0861   |   | 107.9899  |           | 173.0780  |
| Frequencies -- | 223.5841  |   | 239.7966  |           | 262.0089  |
| Frequencies -- | 307.7685  |   | 348.7095  |           | 425.4105  |
| Frequencies -- | 511.1594  |   | 545.8325  |           | 649.3337  |
| Frequencies -- | 691.0476  |   | 828.4077  |           | 891.6562  |
| Frequencies -- | 951.9134  |   | 987.3386  |           | 1018.9171 |
| Frequencies -- | 1034.7477 |   | 1043.9681 |           | 1102.8519 |
| Frequencies -- | 1162.2461 |   | 1169.2324 |           | 1230.4460 |
| Frequencies -- | 1324.1390 |   | 1399.1923 |           | 1412.1628 |
| Frequencies -- | 1443.1028 |   | 1491.2506 |           | 1513.5205 |
| Frequencies -- | 1685.8150 |   | 1784.4604 |           | 3057.9617 |
| Frequencies -- | 3078.6667 |   | 3160.3187 |           | 3178.1332 |
| Frequencies -- | 3184.1275 |   | 3215.5311 |           | 3276.1918 |

## 6. References

1. L. Sheps, D. W. Chandler (2013) Time-resolved broadband cavity-enhanced absorption spectroscopy for chemical kinetics. (Sandia National Laboratories (SNL-CA), Livermore, CA (United States)).
2. L. Sheps, Absolute ultraviolet absorption spectrum of a Criegee intermediate CH<sub>2</sub>OO. *J Phys Chem Lett* **4**, 4201-4205 (2013).
3. V. P. Barber *et al.*, Four-carbon Criegee intermediate from isoprene ozonolysis: methyl vinyl ketone oxide synthesis, infrared spectrum, and OH production. *J Am Chem Soc* **140**, 10866-10880 (2018).
4. D. L. Osborn *et al.*, The multiplexed chemical kinetic photoionization mass spectrometer: A new approach to isomer-resolved chemical kinetics. *Rev Sci Instrum* **79**, 104103 (2008).
5. S. Lias, Ionization energy evaluation. *NIST Chemistry WebBook, NIST Standard Reference Database* **69** (2005).
6. M.-N. Su, J. J.-M. Lin, Note: A transient absorption spectrometer using an ultra bright laser-driven light source. *Rev Sci Instrum* **84**, 086106 (2013).
7. W. Chao, J.-T. Hsieh, C.-H. Chang, J. J.-M. Lin, Direct kinetic measurement of the reaction of the simplest Criegee intermediate with water vapor. *Science* **347**, 751-754 (2015).
8. S. L. Manatt, A. L. Lane, A compilation of the absorption cross-sections of SO<sub>2</sub> from 106 to 403 nm. *J Quant Spectrosc Radiat Transf* **50**, 267-276 (1993).
9. T. C. Johns *et al.*, The second Hadley Centre coupled ocean-atmosphere GCM: model description, spinup and validation. *Clim Dynam* **13**, 103-134 (1997).
10. W. Collins, D. S. Stevenson, C. Johnson, R. Derwent, Tropospheric ozone in a global-scale three-dimensional Lagrangian model and its response to NO<sub>x</sub> emission controls. *J Atmos Chem* **26**, 223-274 (1997).
11. R. Derwent, W. Collins, M. Jenkin, C. Johnson, D. Stevenson, The global distribution of secondary particulate matter in a 3-D Lagrangian chemistry transport model. *J Atmos Chem* **44**, 57-95 (2003).
12. M. Jenkin, L. Watson, S. Utembe, D. Shallcross, A Common Representative Intermediates (CRI) mechanism for VOC degradation. Part 1: gas phase mechanism development. *Atmos Environ* **42**, 7185-7195 (2008).
13. L. Watson, D. Shallcross, S. Utembe, M. Jenkin, A Common Representative Intermediates (CRI) mechanism for VOC degradation. Part 2: gas phase mechanism reduction. *Atmos Environ* **42**, 7196-7204 (2008).
14. S. R. Utembe *et al.*, Simulating secondary organic aerosol in a 3-D Lagrangian chemistry transport model using the reduced Common Representative Intermediates mechanism (CRI v2-R5). *Atmos Environ* **45**, 1604-1614 (2011).
15. M. A. H. Khan *et al.*, A modeling study of secondary organic aerosol formation from sesquiterpenes using the STOCHEM global chemistry and transport model. *J Geophys Res Atmos* **122**, 4426-4439 (2017).
16. J. G. Olivier *et al.*, Description of EDGAR Version 2.0: A set of global emission inventories of greenhouse gases and ozone-depleting substances for all anthropogenic and most natural sources on a per country basis and on 1 degree x 1 degree grid. (1996).
17. J. Cofala, M. Amann, R. Mechler, Scenarios of world anthropogenic emissions of air pollutants and methane up to 2030. *International Institute for Applied Systems Analysis (IIASA), Laxenburg, Austria* (2005).
18. M. A. H. Khan *et al.*, Reassessing the photochemical production of methanol from peroxy radical self and cross reactions using the STOCHEM-CRI global chemistry and transport model. *Atmos Environ* **99**, 77-84 (2014).
19. M. R. McGillen *et al.*, Criegee Intermediate–Alcohol Reactions, A Potential Source of Functionalized Hydroperoxides in the Atmosphere. *ACS Earth Space Chem* **1**, 664-672 (2017).
20. R. Chhantyal-Pun *et al.*, Direct Kinetic and Atmospheric Modeling Studies of Criegee Intermediate Reactions with Acetone. *ACS Earth Space Chem* **3**, 2368-2371 (2019).
21. L. Sheps *et al.*, The reaction of Criegee intermediate CH<sub>2</sub>OO with water dimer: primary products and atmospheric impact. *Phys Chem Chem Phys* **19**, 21970-21979 (2017).



22. M. C. Smith *et al.*, Strong Negative Temperature Dependence of the Simplest Criegee Intermediate CH<sub>2</sub>OO Reaction with Water Dimer. *J Phys Chem Lett* **6**, 2708-2713 (2015).
23. Y. Fang *et al.*, Communication: Real time observation of unimolecular decay of Criegee intermediates to OH radical products. *J Chem Phys* **144**, 061102 (2016).
24. C. A. Taatjes *et al.*, Direct Measurements of Conformer-Dependent Reactivity of the Criegee Intermediate CH<sub>3</sub>CHOO. *Science* **12**, 177-180 (2013).
25. O. Welz *et al.*, Rate coefficients of C1 and C2 Criegee intermediate reactions with formic and acetic acid near the collision limit: direct kinetics measurements and atmospheric implications. *Angew Chem Int Ed* **53**, 4547-4550 (2014).
26. L.-C. Lin, W. Chao, C.-H. Chang, K. Takahashi, J. J.-M. Lin, Temperature dependence of the reaction of *anti*-CH<sub>3</sub>CHOO with water vapor. *Phys Chem Chem Phys* **18**, 28189-28197 (2016).
27. J. M. Anglada, A. Solé, Impact of the water dimer on the atmospheric reactivity of carbonyl oxides. *Phys Chem Chem Phys* **18**, 17698-17712 (2016).
28. L. Vereecken, A. Novelli, D. Taraborrelli, Unimolecular decay strongly limits the atmospheric impact of Criegee intermediates. *Phys Chem Chem Phys* **19**, 31599-31612 (2017).
29. Anonymous, MOLPRO, version 2012.1, A Package of Ab Initio Programs. Werner, H.-J.; Knowles, P. J.; Knizia, G.; Manby, F. R.; Schutz, M.; Celani, P.; Korona, T.; Lindh, R.; Mitrushenkov, A.; Rauhut, G.; *et al.* see <http://www.molpro.net>.
30. Anonymous, MRCC, A String-Based Quantum Chemical Program Suite; written by M. Kállay, see also Kállay, M.; Surján, P. R. Higher Excitations in Coupled-Cluster Theory. *J. Chem. Phys.* 2001, **115**, 2945-2954
31. Anonymous, Gaussian 09, Revision D.01, Frisch, M. J.; Trucks, G. W.; Schlegel, H. B.; Scuseria, G. E.; Robb, M. A.; Cheeseman, J. R.; Scalmani, G.; Barone, V.; Mennucci, B.; Petersson, G. A.; *et al.* Gaussian, Inc., Wallingford CT, 2009.
32. Y. Georgieskii, J. A. Miller, M. P. Burke, S. J. Klippenstein, Reformulation and Solution of the Master Equation for Multiple-Well Chemical Reactions. *J Phys Chem A* **46**, 12146-12154 (2013).
33. Y. Georgieskii, S. J. Klippenstein, MESS.2016.3.23; Argonne National Laboratory, see <https://tcg.cse.anl.gov/papr/codes/mess.html>. (2016).
34. Y. Georgieskii, L. B. Harding, S. J. Klippenstein, VaReCoF, Argonne National Laboratory, see <https://tcg.cse.anl.gov/papr/codes/varecof.html>. (2011).
35. O. Welz *et al.*, Direct kinetic measurements of Criegee intermediate (CH<sub>2</sub>OO) formed by reaction of CH<sub>2</sub>I with O<sub>2</sub>. *Science* **335**, 204-207 (2012).
36. P. Aplincourt, M. F. Ruiz-López, Theoretical investigation of reaction mechanisms for carboxylic acid formation in the atmosphere. *J Am Chem Soc* **122**, 8990-8997 (2000).
37. L. Jiang, Y.-s. Xu, A.-z. Ding, Reaction of Stabilized Criegee Intermediates from Ozonolysis of Limonene with Sulfur Dioxide: Ab Initio and DFT Study. *J Phys Chem A* **114**, 12452-12461 (2010).
38. T. Kurtén, J. R. Lane, S. Jørgensen, H. G. Kjaergaard, A computational study of the oxidation of SO<sub>2</sub> to SO<sub>3</sub> by gas-phase organic oxidants. *J Phys Chem A* **115**, 8669-8681 (2011).
39. L. Vereecken, H. Harder, A. Novelli, The reaction of Criegee intermediates with NO, RO<sub>2</sub>, and SO<sub>2</sub>, and their fate in the atmosphere. *Phys Chem Chem Phys* **14**, 14682-14695 (2012).
40. K. T. Kuwata *et al.*, A Computational Re-examination of the Criegee Intermediate-Sulfur Dioxide Reaction. *J Phys Chem A* **119**, 10316-10335 (2015).
41. M. Pfeifle *et al.*, Nascent energy distribution of the Criegee intermediate CH<sub>2</sub>OO from direct dynamics calculations of primary ozonide dissociation. *J Chem Phys* **148**, 174306 (2018).
42. T. H. Dunning Jr., K. A. Peterson, A. K. Wilson, Gaussian basis sets for use in correlated molecular calculations. X. The atoms aluminum through argon revisited. *J Chem Phys* **114**, 9244-9253 (2001).
43. Y. Georgievskii, S. J. Klippenstein, Long-range transition state theory. *J Chem Phys* **122**, 194103 (2005).
44. L. Vereecken, The reaction of Criegee intermediates with acids and enols. *Phys Chem Chem Phys* **19**, 28630-28640 (2017).
45. J.-D. Chai, M. Head-Gordon, Long-range corrected hybrid density functionals with damped atom-atom dispersion corrections. *Phys Chem Chem Phys* **10**, 6615-6620 (2008).

46. S. Grimme, J. Antony, S. Ehrlich, H. Krieg, A consistent and accurate ab initio parametrization of density functional dispersion correction (DFT-D) for the 94 elements H-Pu. *J Chem Phys* **132**, 154104 (2010).
47. G. Knizia, T. B. Adler, H.-J. Werner, Simplified CCSD(T)-F12 methods: Theory and benchmarks. *J Chem Phys* **130**, 054104 (2009).
48. J. Anglada, J. Gonzalez, M. Torrent-Sucarrat, Effects of the substituents on the reactivity of carbonyl oxides. A theoretical study on the reaction of substituted carbonyl oxides with water. *Phys Chem Chem Phys* **13**, 13034-13045 (2011).
49. P. Aplincourt, J. M. Anglada, Theoretical studies on isoprene ozonolysis under tropospheric conditions. 1. Reaction of substituted carbonyl oxides with water. *J Phys Chem A* **107**, 5798-5811 (2003).
50. K. T. Kuwata, M. R. Hermes, M. J. Carlson, C. K. Zogg, Computational studies of the isomerization and hydration reactions of acetaldehyde oxide and methyl vinyl carbonyl oxide. *J Phys Chem A* **114**, 9192-9204 (2010).
51. S. J. Klippenstein, L. B. Harding, B. Ruscic, Ab Initio Computations and Active Thermochemical Tables Hand in Hand: Heats of Formation of Core Combustion Species. *J Phys Chem A* **121**, 6580-6602 (2017).
52. B. Long, J. L. Bao, D. G. Truhlar, Atmospheric chemistry of Criegee intermediates: unimolecular reactions and reactions with water. *J Am Chem Soc* **138**, 14409-14422 (2016).
53. T. Berndt *et al.*, Kinetics of the unimolecular reaction of CH<sub>2</sub>OO and the bimolecular reactions with the water monomer, acetaldehyde and acetone under atmospheric conditions. *Phys Chem Chem Phys* **17**, 19862-19873 (2015).
54. B. Long, J. L. Bao, D. G. Truhlar, Unimolecular reaction of acetone oxide and its reaction with water in the atmosphere. *Proc Natl Acad U S A* **115**, 6135-6140 (2018).
55. C. Kuang, P. H. McMurry, A. V. McCormick, F. L. Eisele, Dependence of nucleation rates on sulfuric acid vapor concentration in diverse atmospheric locations. *J Geophys Res Atmos* **113** (2008).
56. J. Kirkby *et al.*, Role of sulphuric acid, ammonia and galactic cosmic rays in atmospheric aerosol nucleation. *Nature* **476**, 429 (2011).
